# Supplementary material for: Mechanisms and origins of the switchable regioselectivity of FeBr3-catalyzed [1,2]-aryl and [1,2]-alkyl shifts of α-aryl aldehydes
Source: Royal Society of Chemistry journal article supplement (doi:10.1039/c6ob00001k), 2016-01-01
Supplement: c6ob00001k1.pdf [file c6ob00001k1.pdf]

## Supporting Information

### Mechanisms and Origins of Switchable Regioselectivity of FeBr<sub>3</sub>-Catalyzed

#### [1,2]-Aryl and [1,2]-Alkyl Shift of $\alpha$ -Aryl Aldehydes

Congcong Liu,<sup>a</sup> Yuxia Liu,<sup>\*a</sup> Yanan Tang, Haosheng Liang<sup>a</sup> and Siwei Bi<sup>\*a</sup>

---

<sup>a</sup> College of Chemistry and Chemical Engineering, Qufu Normal University, Qufu 273165, P. R. China.  
E-mail: [liuyuxia2008@163.com](mailto:liuyuxia2008@163.com), [siweibi@126.com](mailto:siweibi@126.com); Fax: +86-537-4456305; Tel: +86-537-4458308

Table S1. Comparison of the relative free energies in toluene solvent of the doublet- and sextet-states for several mono-FeBr<sub>3</sub>-involved species and the singlet-, triplet- and eleven-states for several bis-FeBr<sub>3</sub>-involved species in the reaction under study. The free energies are given in kcal mol<sup>-1</sup>.

| mono-FeBr <sub>3</sub> -catalyzed mechanism |           |                        |                        |                        | bis-FeBr <sub>3</sub> -catalyzed mechanism |             |                         |                         |                         |
|---------------------------------------------|-----------|------------------------|------------------------|------------------------|--------------------------------------------|-------------|-------------------------|-------------------------|-------------------------|
|                                             | <b>1a</b> | <b>TS<sub>1a</sub></b> | <b>TS<sub>8a</sub></b> | <b>TS<sub>6a</sub></b> |                                            | <b>IM6a</b> | <b>TS<sub>10a</sub></b> | <b>TS<sub>14a</sub></b> | <b>TS<sub>12a</sub></b> |
| <i>Quartet-state</i>                        | 0.0       | 21.5                   | 19.1                   | 24.5                   | <i>Seven-state</i>                         | 7.5         | 16.4                    | 18.0                    | 23.2                    |
| Doublet-sate                                | 3.5       | 24.9                   | 25.9                   | 30.0                   | Triplet-sate                               | 12.7        | 21.5                    |                         |                         |
| Sextet-state                                | 3.0       | 25.1                   | 25.5                   | 27.8                   | Eleven-state                               | 11.6        | 17.5                    | 22.4                    | 24.2                    |
|                                             |           |                        |                        |                        | Singlet-state                              | 57.7        |                         |                         |                         |

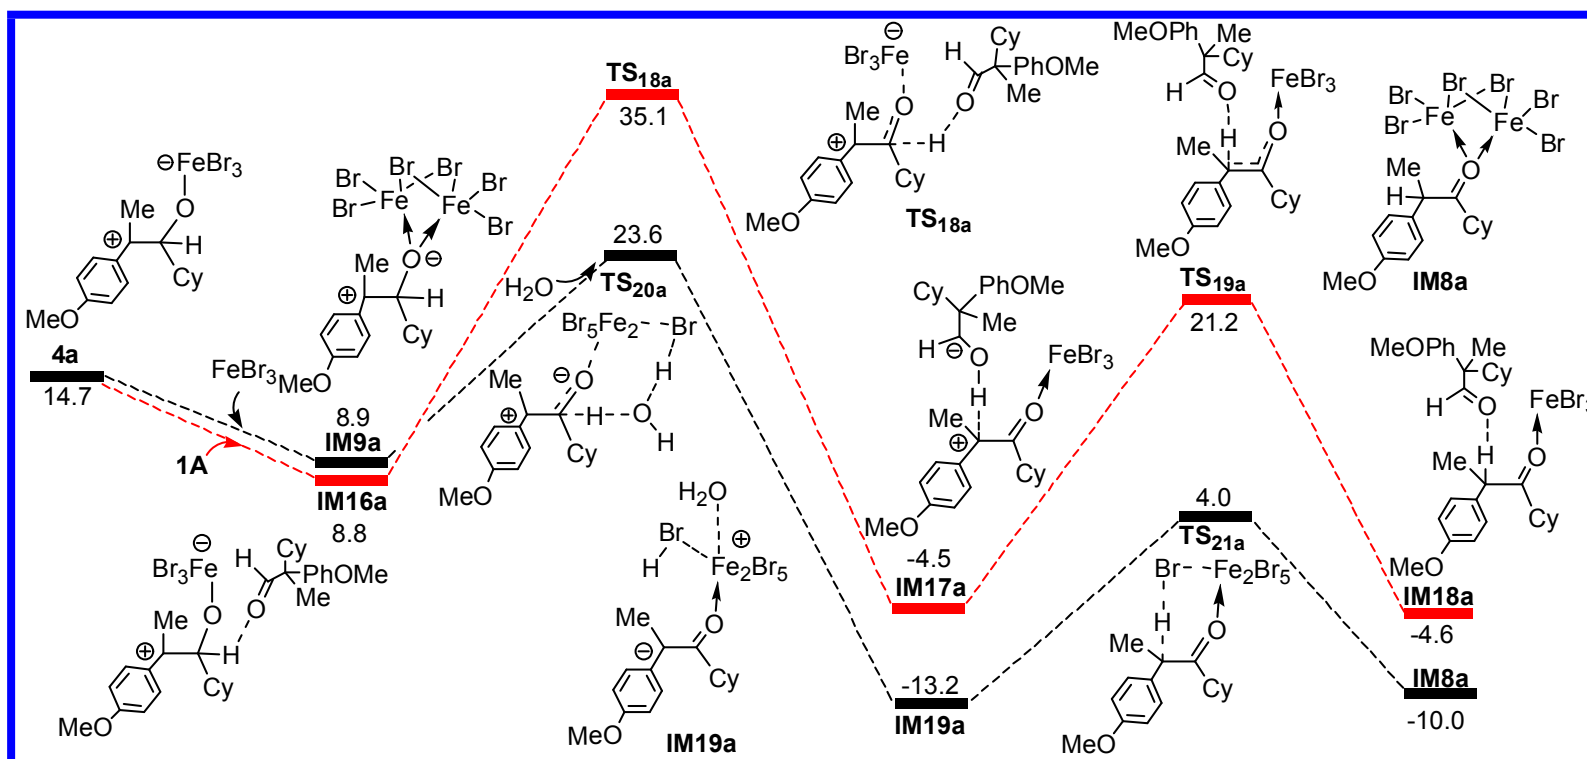

**Fig. S1** Single-point solvation-corrected free energy profiles in toluene along other possible H-shift pathways for **1A** involved system and schematic structures for the species involved. The relative free energies are given in kcal mol<sup>-1</sup>.

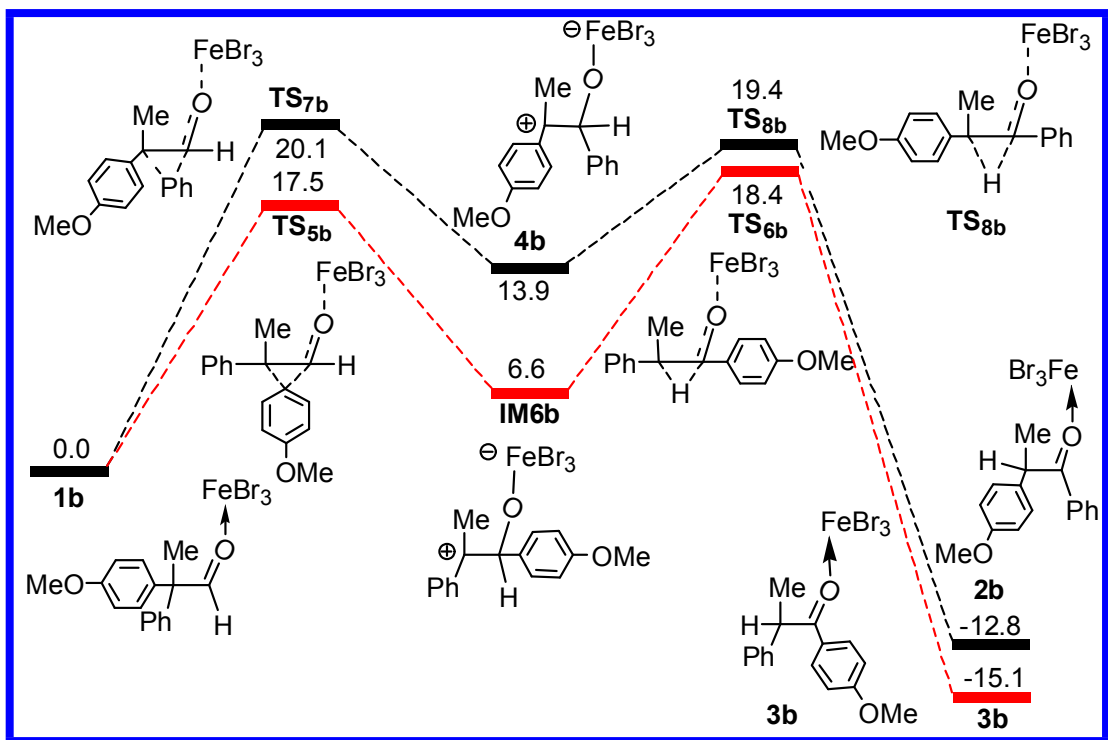

**Fig. S2** Single-point solvation-corrected free energy profiles in toluene for the mono- $\text{FeBr}_3$ -catalyzed rearrangement of the 2-phenyl,2-*p*- $\text{C}_6\text{H}_4\text{OMe}$ -propylaldehyde precursor (**1b**) via two competitive aryl-shifts. The relative free energies are given in  $\text{kcal mol}^{-1}$ .

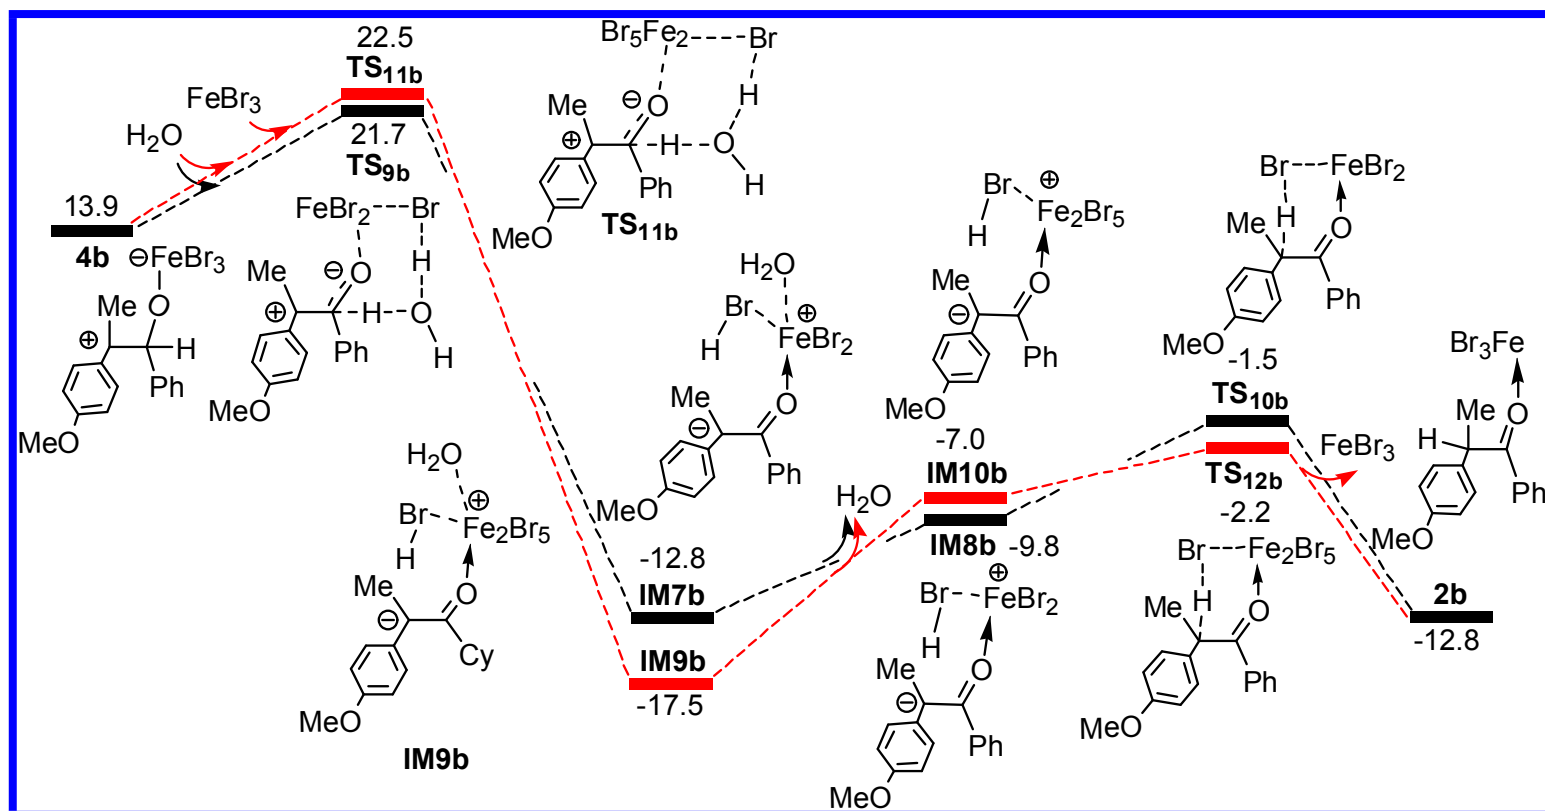

**Fig. S3** Single-point solvation-corrected free energy profiles in toluene along possible H-shift pathways from **4b** and schematic structures for the species involved. The relative free energies are given in kcal mol<sup>-1</sup>.

## Cartesian Coordinates for the Stationary Points Given in Fig. 1.

|                         |             |             |             |   |             |             |             |
|-------------------------|-------------|-------------|-------------|---|-------------|-------------|-------------|
| <b>FeBr<sub>3</sub></b> |             |             |             | C | -3.15735500 | -1.43183100 | -1.15760700 |
| SCF done: -164.3475177  |             |             |             | C | -3.06143800 | -0.49045900 | 1.04719900  |
| Fe                      | -0.39195300 | -0.00055100 | 0.00002300  | C | -3.93557100 | -2.48831500 | -0.68270500 |
| Br                      | -2.72669200 | -0.00011900 | -0.00000800 | H | -2.90862500 | -1.42398000 | -2.21180100 |
| Br                      | 1.50852700  | 1.59998900  | -0.00000500 | C | -3.82845500 | -1.53721900 | 1.53599500  |
| Br                      | 1.50933000  | -1.59946000 | -0.00000500 | H | -2.73507900 | 0.26774100  | 1.75162200  |
| <b>H<sub>2</sub>O</b>   |             |             |             | C | -4.27725700 | -2.54918100 | 0.67365600  |
| SCF done: -76.4663367   |             |             |             | H | -4.26222900 | -3.25349800 | -1.37643300 |
| O                       | 0.00000000  | 0.00000000  | 0.11884900  | H | -4.09199200 | -1.59553300 | 2.58666900  |
| H                       | 0.00000000  | 0.76007400  | -0.47539600 | O | -5.02356500 | -3.52827500 | 1.24465900  |
| H                       | 0.00000000  | -0.76007400 | -0.47539600 | C | -2.26959900 | 2.15065700  | -0.28405300 |
| <b>1a</b>               |             |             |             | C | -1.18358600 | 3.25165900  | -0.44924800 |
| SCF done: -937.9462798  |             |             |             | C | -3.61254100 | 2.62483300  | -0.86480600 |
| C                       | -1.82236400 | 0.75435200  | -0.85042700 | H | -2.42266600 | 2.01902500  | 0.79307000  |
| C                       | -1.70592000 | 0.75711100  | -2.38195300 | C | -1.78741600 | 4.67553900  | -0.45646900 |
| H                       | -1.10311500 | 1.60072100  | -2.72388900 | H | -0.61162500 | 3.10424400  | -1.37156800 |
| H                       | -1.21909000 | -0.14905400 | -2.74672200 | H | -0.46112600 | 3.16787900  | 0.37289400  |
| H                       | -2.69276000 | 0.83470800  | -2.84258100 | C | -4.15396800 | 3.83644000  | -0.06897700 |
| C                       | -0.50202500 | 0.39507300  | -0.22007800 | H | -3.47158300 | 2.90599600  | -1.91499800 |
| H                       | -0.43254200 | 0.47113600  | 0.87670200  | H | -4.34528000 | 1.81109200  | -0.85623500 |
| O                       | 0.48096400  | -0.00872200 | -0.85247900 | C | -3.02233300 | 4.75889200  | 0.44915000  |
| Fe                      | 2.34124900  | -0.63175400 | -0.26907200 | H | -2.07415800 | 4.95130100  | -1.47932500 |
| Br                      | 3.13532100  | -2.71475700 | -1.11187500 | H | -1.02608500 | 5.39927900  | -0.14731200 |
| Br                      | 3.70744700  | 1.55763400  | -0.14075100 | H | -4.75511000 | 3.48323800  | 0.77701300  |
| Br                      | 2.32800800  | 0.09564100  | 2.22447700  | H | -4.83484400 | 4.40429400  | -0.71320300 |
| C                       | -2.71668500 | -0.39946900 | -0.31799700 | H | -2.73562400 | 4.46639000  | 1.46782000  |
|                         |             |             |             | H | -3.37965800 | 5.79159700  | 0.52069400  |
|                         |             |             |             | C | -5.48235200 | -4.59719900 | 0.42589600  |

|   |             |             |             |
|---|-------------|-------------|-------------|
| H | -4.64596300 | -5.15025800 | -0.01861800 |
| H | -6.04221400 | -5.26030800 | 1.08616700  |
| H | -6.14426100 | -4.23783900 | -0.37180000 |

### TS1a

SCF done: -937.9103894

|    |             |             |             |
|----|-------------|-------------|-------------|
| C  | -1.32909700 | 0.38385400  | -1.10525600 |
| C  | -2.56157400 | -0.26022400 | -0.66083800 |
| C  | -2.58233100 | -1.04380800 | 0.51985600  |
| C  | -3.75098400 | -0.17526200 | -1.41081800 |
| C  | -3.73396900 | -1.69321100 | 0.92575900  |
| H  | -1.67124700 | -1.19011400 | 1.09068100  |
| C  | -4.91733200 | -0.81179700 | -1.00505100 |
| H  | -3.77834500 | 0.41819800  | -2.31898300 |
| C  | -4.91565300 | -1.58042700 | 0.17205200  |
| H  | -3.74381000 | -2.31454900 | 1.81457200  |
| H  | -5.81456800 | -0.71121800 | -1.60338500 |
| C  | -0.98743400 | 0.46069100  | -2.56290200 |
| H  | -0.20224900 | 1.19424400  | -2.74723400 |
| H  | -0.58275600 | -0.51986800 | -2.84658700 |
| H  | -1.85275400 | 0.65734100  | -3.19909800 |
| C  | -0.32149400 | 0.77776700  | -0.18190700 |
| H  | -0.50852200 | 0.60286100  | 0.88096300  |
| O  | 0.91921900  | 0.95302100  | -0.54943700 |
| Fe | 2.46085600  | -0.10590900 | -0.11555900 |
| Br | 4.71344400  | 0.71896100  | -0.27520300 |
| Br | 1.59725500  | -1.51791100 | 1.96583300  |
| Br | 1.79617500  | -2.53160700 | -0.94046400 |
| C  | -1.36485400 | 2.42661600  | -0.31484100 |
| C  | -2.38171200 | 2.49878800  | 0.83145900  |
| C  | -0.22093900 | 3.42800400  | -0.19691500 |
| H  | -1.84876500 | 2.56279500  | -1.28404400 |

|   |             |             |             |
|---|-------------|-------------|-------------|
| C | -2.29567300 | 3.85970300  | 1.56499700  |
| H | -2.23191400 | 1.69406800  | 1.55970000  |
| H | -3.39133200 | 2.36060100  | 0.43233100  |
| C | -0.80960300 | 4.86230200  | -0.24700000 |
| H | 0.31745300  | 3.26990500  | 0.74239200  |
| H | 0.50933100  | 3.28551400  | -0.99480400 |
| C | -2.12205700 | 5.01203800  | 0.56832100  |
| H | -1.45410000 | 3.85054200  | 2.26752400  |
| H | -3.19963000 | 3.99645900  | 2.16803700  |
| H | -0.98434800 | 5.14790700  | -1.29042800 |
| H | -0.04128100 | 5.54377400  | 0.13426600  |
| H | -2.98510500 | 5.02074100  | -0.11006900 |
| H | -2.13716600 | 5.97353600  | 1.09168200  |
| O | -5.98456300 | -2.25164200 | 0.65175200  |
| C | -7.20699500 | -2.22044500 | -0.08033300 |
| H | -7.90504100 | -2.84021300 | 0.48249400  |
| H | -7.60381400 | -1.20096700 | -0.15299900 |
| H | -7.07994600 | -2.63701500 | -1.08630300 |

### TS2a

SCF done: -937.9242407

|    |             |             |             |
|----|-------------|-------------|-------------|
| C  | -1.69881100 | -0.95840000 | -0.24435500 |
| C  | -0.69758000 | -1.61483400 | -1.14954400 |
| O  | -1.16548300 | 0.28704600  | -0.65056800 |
| Fe | 0.08918700  | 1.36742500  | 0.32564700  |
| Br | 0.20699700  | 0.85910200  | 2.70800200  |
| Br | 2.30488700  | 1.59929400  | -1.06708700 |
| Br | 0.16147600  | 3.77558100  | -0.65027600 |
| C  | -1.07974400 | -1.67556600 | -2.59568500 |
| H  | -1.85202300 | -2.44835000 | -2.70988200 |
| H  | -1.52122600 | -0.72466000 | -2.89764300 |
| H  | -0.26602100 | -1.92050500 | -3.27373700 |

|   |             |             |             |
|---|-------------|-------------|-------------|
| C | 0.57263000  | -2.06860400 | -0.66688800 |
| C | 0.80325000  | -2.30372700 | 0.72319700  |
| C | 1.66725200  | -2.30079000 | -1.54349600 |
| C | 2.01857300  | -2.74835100 | 1.18749200  |
| H | 0.01924600  | -2.12557600 | 1.44552700  |
| C | 2.89699600  | -2.73463500 | -1.08739600 |
| H | 1.56690300  | -2.10588000 | -2.60307700 |
| C | 3.08619900  | -2.96138400 | 0.29071700  |
| H | 2.18925200  | -2.91557500 | 2.24478100  |
| H | 3.70734300  | -2.87820700 | -1.79097000 |
| O | 4.23461900  | -3.37534300 | 0.84174500  |
| C | 5.38823700  | -3.55660800 | 0.01575100  |
| H | 5.66644100  | -2.62111600 | -0.48058200 |
| H | 6.18603600  | -3.86326900 | 0.69133400  |
| H | 5.21853400  | -4.33975600 | -0.73107300 |
| H | -1.52215500 | -1.14670900 | 0.81963900  |
| C | -3.19604100 | -1.12430800 | -0.50781900 |
| C | -3.65303000 | -2.57395500 | -0.19157500 |
| C | -4.00083100 | -0.11054600 | 0.32349500  |
| H | -3.38938900 | -0.90353800 | -1.56442100 |
| C | -5.13939300 | -2.64957100 | 0.23083200  |
| H | -3.02965600 | -2.99211000 | 0.61046800  |
| H | -3.48611600 | -3.21128700 | -1.06957000 |
| C | -5.50176500 | -0.15192000 | -0.04730400 |
| H | -3.86778300 | -0.34196500 | 1.38871400  |
| H | -3.59859400 | 0.89568100  | 0.17393000  |
| C | -5.96806700 | -1.56611700 | -0.47039000 |
| H | -5.22211500 | -2.51562400 | 1.31671000  |
| H | -5.53633000 | -3.64761700 | 0.01525500  |
| H | -5.70455100 | 0.55717500  | -0.85813900 |
| H | -6.08752900 | 0.19132100  | 0.81293700  |
| H | -5.86290000 | -1.68770100 | -1.55686900 |

|   |             |             |             |
|---|-------------|-------------|-------------|
| H | -7.03417100 | -1.69472500 | -0.25412900 |
|---|-------------|-------------|-------------|

### 5a

SCF done: -937.9287261

|    |             |             |             |
|----|-------------|-------------|-------------|
| C  | -1.06993500 | 1.20832500  | -0.72379000 |
| C  | -2.53749400 | 0.96024300  | -0.52353900 |
| C  | -3.48300800 | 1.50778200  | -1.40776900 |
| C  | -3.00308600 | 0.20929300  | 0.56130400  |
| C  | -4.84275900 | 1.31824500  | -1.20605300 |
| H  | -3.16195100 | 2.09434500  | -2.26218100 |
| C  | -4.36709200 | 0.00271700  | 0.76912300  |
| H  | -2.29117700 | -0.24517700 | 1.24214400  |
| C  | -5.29814900 | 0.56151400  | -0.11565100 |
| H  | -5.57506700 | 1.74215000  | -1.88490000 |
| H  | -4.68685300 | -0.59778100 | 1.61202900  |
| C  | -0.58553700 | 1.37925600  | -2.14723800 |
| H  | 0.50243500  | 1.33680500  | -2.21067300 |
| H  | -1.00200700 | 0.59484200  | -2.78458900 |
| H  | -0.91214400 | 2.34652500  | -2.54127300 |
| C  | -0.27959400 | 1.74849600  | 0.41602400  |
| H  | -0.85192200 | 1.90692300  | 1.33173800  |
| O  | -0.21913100 | 0.31006000  | 0.11219700  |
| Fe | 1.29041200  | -1.02459700 | -0.23106400 |
| Br | 3.17097300  | -0.29482800 | -1.53768000 |
| Br | 1.44329200  | -2.37320300 | 1.95465400  |
| Br | 0.08938900  | -3.25754900 | -0.69104100 |
| C  | 0.98484000  | 2.56741400  | 0.33071000  |
| C  | 0.61161100  | 4.07358600  | 0.21709400  |
| C  | 1.89528900  | 2.33110500  | 1.55179300  |
| H  | 1.54362200  | 2.26800800  | -0.56168200 |
| C  | 1.72248500  | 4.99633600  | 0.77104900  |
| H  | -0.32588300 | 4.26906000  | 0.75448200  |



|   |             |             |             |
|---|-------------|-------------|-------------|
| H | 0.41603300  | 4.30930100  | -0.83540100 |
| C | 3.24937000  | 3.05678700  | 1.37547200  |
| H | 1.37877300  | 2.69488700  | 2.45021300  |
| H | 2.06574500  | 1.25962100  | 1.71013100  |
| C | 3.11027700  | 4.37358700  | 0.57348500  |
| H | 1.55832800  | 5.17368400  | 1.84144600  |
| H | 1.66057300  | 5.97652900  | 0.28635000  |
| H | 3.95527800  | 2.39150900  | 0.86758300  |
| H | 3.67004900  | 3.26295200  | 2.36603500  |
| H | 3.26397300  | 4.17718400  | -0.49544700 |
| H | 3.89415900  | 5.07913000  | 0.86822200  |
| O | -6.64706200 | 0.42812600  | -0.01046100 |
| C | -7.16954000 | -0.34344300 | 1.06291500  |
| H | -8.25381900 | -0.32196600 | 0.94698800  |
| H | -6.82146500 | -1.38281600 | 1.01892800  |
| H | -6.90179600 | 0.08617000  | 2.03641400  |

### TS3a

SCF done: -937.8718511

|   |             |            |             |
|---|-------------|------------|-------------|
| C | -0.20441500 | 1.42429100 | -1.37501500 |
| C | -1.56613400 | 1.57170200 | -0.78809000 |
| C | -1.78124000 | 2.46048800 | 0.28143100  |
| C | -2.66097900 | 0.86025300 | -1.29433600 |
| C | -3.04586200 | 2.63248300 | 0.82502200  |
| H | -0.94706800 | 3.03481300 | 0.67512900  |
| C | -3.93320700 | 1.00961700 | -0.74595600 |
| H | -2.52184500 | 0.14727000 | -2.09990900 |
| C | -4.13325000 | 1.90130700 | 0.31807800  |
| H | -3.22184700 | 3.32388600 | 1.64218200  |
| H | -4.75157700 | 0.42323500 | -1.14463200 |
| C | -0.05318000 | 1.59206000 | -2.86875100 |
| H | -0.31157400 | 2.62012400 | -3.14320500 |

|    |             |             |             |
|----|-------------|-------------|-------------|
| H  | 0.96894600  | 1.38379700  | -3.19030900 |
| H  | -0.73282500 | 0.92434300  | -3.40636100 |
| C  | 0.95783700  | 1.46806400  | -0.48985900 |
| H  | -0.16330000 | 0.65738500  | 1.74559900  |
| O  | 0.61454600  | 0.18470300  | -0.88644300 |
| Fe | 0.41476600  | -1.85086900 | -0.17876700 |
| Br | 2.66591500  | -2.65643900 | 0.10214100  |
| Br | -0.23593200 | -0.65438900 | 2.37048200  |
| Br | -1.62260700 | -2.77882200 | -1.06787900 |
| C  | 2.34708600  | 2.01250200  | -0.54464900 |
| C  | 2.33065500  | 3.56524500  | -0.50621300 |
| C  | 3.25040700  | 1.44415000  | 0.57009500  |
| H  | 2.77498300  | 1.68204200  | -1.50684700 |
| C  | 3.65850300  | 4.15126200  | 0.02766500  |
| H  | 1.50084800  | 3.90925000  | 0.12356200  |
| H  | 2.13075800  | 3.94443500  | -1.51529700 |
| C  | 4.72123400  | 1.86528200  | 0.34578400  |
| H  | 2.88694600  | 1.82273600  | 1.53409500  |
| H  | 3.17334800  | 0.35346600  | 0.60785400  |
| C  | 4.84792500  | 3.25123600  | -0.33201200 |
| H  | 3.60683900  | 4.25327200  | 1.11901300  |
| H  | 3.79936500  | 5.16303100  | -0.36753600 |
| H  | 5.22955800  | 1.11006600  | -0.26373200 |
| H  | 5.23444000  | 1.87423700  | 1.31371700  |
| H  | 4.88799600  | 3.13388600  | -1.42301300 |
| H  | 5.79117700  | 3.72791900  | -0.04486700 |
| O  | -5.32711700 | 2.12853300  | 0.92026800  |
| C  | -6.46361600 | 1.39356400  | 0.47912800  |
| H  | -6.31895800 | 0.31465400  | 0.61086800  |
| H  | -7.29370800 | 1.72582200  | 1.10334500  |
| H  | -6.69461100 | 1.60375700  | -0.57227600 |

**IM1a**

SCF done: -937.9499742

|    |             |             |             |
|----|-------------|-------------|-------------|
| C  | 1.54515000  | -0.66386500 | 0.48375100  |
| C  | 2.95788400  | -0.74548000 | 0.17882300  |
| C  | 3.55018300  | 0.01291400  | -0.87032400 |
| C  | 3.80715400  | -1.64036800 | 0.87559300  |
| C  | 4.88725700  | -0.10900800 | -1.18561000 |
| H  | 2.92735200  | 0.65839300  | -1.47899300 |
| C  | 5.15926100  | -1.75218500 | 0.58497200  |
| H  | 3.40785600  | -2.22898900 | 1.69400900  |
| C  | 5.71357200  | -0.98706000 | -0.45548700 |
| H  | 5.32577500  | 0.44941100  | -2.00558700 |
| H  | 5.77272800  | -2.43004000 | 1.16567700  |
| C  | 0.79687000  | -1.89153500 | 0.92096700  |
| H  | 0.11180700  | -1.69065200 | 1.75208700  |
| H  | 1.46199500  | -2.70757400 | 1.20264000  |
| C  | 0.77767100  | 0.54768400  | 0.34589600  |
| O  | -0.49396500 | 0.49508700  | 0.35756400  |
| Fe | -2.11445400 | -0.59620800 | 0.30627900  |
| Br | -3.20365900 | -1.35058800 | 2.31003700  |
| Br | -3.88920400 | 1.19026800  | -1.25548900 |
| Br | -2.07769600 | -1.87010600 | -1.89100100 |
| H  | -3.42972600 | -0.00675500 | -2.02946400 |
| H  | 0.19017800  | -2.26323100 | 0.08058600  |
| O  | 7.00734300  | -1.02500400 | -0.83570100 |
| C  | 7.90204100  | -1.90817400 | -0.16184800 |
| H  | 8.87059100  | -1.77157100 | -0.64268900 |
| H  | 7.98462700  | -1.65606100 | 0.90166900  |
| H  | 7.58586500  | -2.95206900 | -0.26862700 |
| C  | 1.37262500  | 1.94290600  | 0.34208100  |
| C  | 0.93474100  | 2.76104200  | -0.90931500 |
| C  | 0.93316700  | 2.68144400  | 1.63368900  |

|   |             |            |             |
|---|-------------|------------|-------------|
| H | 2.46152100  | 1.86592900 | 0.36962500  |
| C | 0.88896700  | 4.28117100 | -0.63329600 |
| H | -0.05064000 | 2.41723900 | -1.23733800 |
| H | 1.63272900  | 2.55509800 | -1.73058000 |
| C | 1.67248300  | 4.03154900 | 1.76673800  |
| H | -0.15022000 | 2.83141900 | 1.58819300  |
| H | 1.12314900  | 2.05927300 | 2.51520100  |
| C | 1.94907200  | 4.69353900 | 0.39519000  |
| H | -0.10312800 | 4.55886800 | -0.25651000 |
| H | 1.02270400  | 4.82733100 | -1.57315300 |
| H | 2.61754900  | 3.88655800 | 2.30298600  |
| H | 1.06526100  | 4.69909900 | 2.38871400  |
| H | 2.93914500  | 4.39362300 | 0.02645000  |
| H | 1.98264300  | 5.78288800 | 0.50188600  |

**TS4a**

SCF done: -937.9418823

|   |             |             |             |
|---|-------------|-------------|-------------|
| C | 1.14985100  | -0.43525600 | 0.88451700  |
| C | 2.51656800  | -0.58483300 | 0.42773100  |
| C | 2.95581100  | -0.01118700 | -0.80228500 |
| C | 3.45080800  | -1.38803800 | 1.13018000  |
| C | 4.23727300  | -0.19695100 | -1.26874500 |
| H | 2.25734600  | 0.55911100  | -1.40625800 |
| C | 4.74656700  | -1.57569800 | 0.67437900  |
| H | 3.15971600  | -1.85323300 | 2.06470700  |
| C | 5.15526700  | -0.97863600 | -0.53257100 |
| H | 4.56448700  | 0.23216600  | -2.20950900 |
| H | 5.43218900  | -2.18069400 | 1.25493300  |
| C | 0.65771300  | -1.22186300 | 2.08889700  |
| H | 1.09787800  | -0.82097600 | 3.01220200  |
| H | -0.42757900 | -1.15786100 | 2.18709900  |
| H | 0.92879100  | -2.27811000 | 2.01714900  |

|    |             |             |             |
|----|-------------|-------------|-------------|
| C  | 0.36310500  | 0.80834900  | 0.59913000  |
| H  | 0.41874900  | -1.31061300 | -0.24326700 |
| O  | -0.87592800 | 0.76191300  | 0.55519700  |
| Fe | -2.53965100 | -0.40587000 | -0.06878800 |
| Br | -3.36632400 | -1.60480000 | 1.86565300  |
| Br | -3.52008200 | 0.85229100  | -1.87758800 |
| Br | -0.56257100 | -2.10623500 | -1.21662600 |
| O  | 6.38303000  | -1.09578700 | -1.07161100 |
| C  | 7.36572800  | -1.88853500 | -0.40441700 |
| H  | 8.25841300  | -1.83695200 | -1.02722200 |
| H  | 7.59000500  | -1.48649500 | 0.58995100  |
| H  | 7.04026900  | -2.93096900 | -0.31694500 |
| C  | 1.02152500  | 2.17350400  | 0.49694400  |
| C  | 0.52585800  | 2.97275100  | -0.74429500 |
| C  | 0.69082200  | 2.95510700  | 1.79894900  |
| H  | 2.10594800  | 2.04548500  | 0.45640500  |
| C  | 0.53478600  | 4.49874300  | -0.50120500 |
| H  | -0.48465300 | 2.64562900  | -1.00491800 |
| H  | 1.17252300  | 2.73104000  | -1.59697700 |
| C  | 1.47400000  | 4.28602100  | 1.84632300  |
| H  | -0.38916800 | 3.13367000  | 1.81521600  |
| H  | 0.92043600  | 2.35289800  | 2.68538300  |
| C  | 1.67196000  | 4.90771200  | 0.44308600  |
| H  | -0.42343400 | 4.80994400  | -0.06770300 |
| H  | 0.61801200  | 5.01838300  | -1.46138800 |
| H  | 2.44901100  | 4.12622500  | 2.32115600  |
| H  | 0.92685100  | 4.98254000  | 2.49171600  |
| H  | 2.62736200  | 4.57349000  | 0.01682100  |
| H  | 1.73928500  | 5.99782600  | 0.52117200  |

**6a**

SCF done: -937.9666997

|    |             |             |             |
|----|-------------|-------------|-------------|
| C  | 0.58206600  | 0.96728600  | 0.28803500  |
| O  | -0.48303000 | 0.77614400  | -0.32845100 |
| C  | 1.05338700  | -0.00447300 | 1.35669700  |
| H  | 0.32504500  | -0.82300800 | 1.37390000  |
| C  | 1.03136900  | 0.67007500  | 2.74281300  |
| H  | 0.00963300  | 0.95071900  | 3.01212000  |
| H  | 1.40059900  | -0.03531900 | 3.49223800  |
| H  | 1.65547000  | 1.56712900  | 2.78499000  |
| C  | 2.40321100  | -0.58078300 | 0.92865200  |
| C  | 2.43293400  | -1.55277300 | -0.08981400 |
| C  | 3.61798500  | -0.17935400 | 1.49131800  |
| C  | 3.63124300  | -2.10007100 | -0.52283100 |
| H  | 1.50363700  | -1.89691600 | -0.53770400 |
| C  | 4.83352300  | -0.72403400 | 1.06686500  |
| H  | 3.63607900  | 0.55814400  | 2.28762600  |
| C  | 4.84474000  | -1.68869000 | 0.05219400  |
| H  | 3.65394400  | -2.85616800 | -1.30043100 |
| H  | 5.75327200  | -0.39631100 | 1.53635300  |
| Fe | -1.96903700 | -0.58312200 | -0.39773600 |
| Br | -4.15975200 | 0.74830800  | -0.59885100 |
| Br | -1.41510000 | -2.61812700 | -1.53681700 |
| Br | -3.04145700 | -0.58309200 | 1.96642600  |
| O  | 5.96384000  | -2.28600700 | -0.43817300 |
| C  | 7.22195600  | -1.92465900 | 0.11313200  |
| H  | 7.27480700  | -2.15579100 | 1.18452600  |
| H  | 7.96496900  | -2.51955800 | -0.41942200 |
| H  | 7.43758200  | -0.85911000 | -0.03683600 |
| C  | 1.39317500  | 2.18964200  | -0.05435500 |
| C  | 1.83627900  | 2.16562000  | -1.55167200 |
| C  | 0.57665700  | 3.47510800  | 0.23674600  |
| H  | 2.28585100  | 2.18925400  | 0.57871000  |
| C  | 2.07246200  | 3.58763500  | -2.10956500 |

|   |             |            |             |
|---|-------------|------------|-------------|
| H | 1.06935000  | 1.65981300 | -2.14590100 |
| H | 2.74947200  | 1.56644100 | -1.62821300 |
| C | 1.46968000  | 4.72703500 | 0.07564300  |
| H | -0.26883200 | 3.50437400 | -0.45835300 |
| H | 0.14700400  | 3.44606800 | 1.24390300  |
| C | 2.55221800  | 4.54879800 | -1.01483500 |
| H | 1.14292800  | 3.97582200 | -2.54391100 |
| H | 2.79658500  | 3.53863400 | -2.92959900 |
| H | 1.94680600  | 4.96829000 | 1.03247100  |
| H | 0.82660800  | 5.57936800 | -0.17097500 |
| H | 3.47339600  | 4.15104500 | -0.56901700 |
| H | 2.81779200  | 5.52087500 | -1.44302800 |

### 3A

SCF done: -773.5947868

|   |             |             |             |
|---|-------------|-------------|-------------|
| C | -2.03681400 | 0.00887500  | 0.07364700  |
| C | -1.96762400 | -1.10260500 | -0.99273400 |
| C | -3.52357800 | 0.30204300  | 0.44025500  |
| C | -2.51822300 | -2.44021900 | -0.44402800 |
| H | -2.54275700 | -0.76843200 | -1.86294000 |
| C | -4.41907100 | -0.95558900 | 0.33429200  |
| H | -3.56688000 | 0.70941600  | 1.45766300  |
| C | -3.62284100 | -2.23456800 | 0.61848900  |
| H | -2.91323800 | -3.03064200 | -1.27953600 |
| H | -5.26840800 | -0.86327200 | 1.02041400  |
| H | -4.28586300 | -3.10638000 | 0.64876000  |
| H | -0.93642700 | -1.23259300 | -1.33785600 |
| H | -1.70149900 | -3.02965100 | -0.01103600 |
| H | -3.17270200 | -2.15913700 | 1.61727900  |
| H | -4.84641900 | -1.02117800 | -0.67437100 |
| H | -3.90469400 | 1.07876800  | -0.23101100 |
| H | -1.50608200 | -0.33587200 | 0.96949100  |

|   |             |             |             |
|---|-------------|-------------|-------------|
| C | -1.37048400 | 1.29206100  | -0.42012800 |
| O | -1.68095300 | 1.78839300  | -1.48971300 |
| C | -0.29168000 | 1.92278600  | 0.47306100  |
| C | 0.96052700  | 1.05089100  | 0.42143700  |
| C | 1.52883800  | 0.51673200  | 1.58838600  |
| C | 1.58777400  | 0.77013500  | -0.79785000 |
| C | 2.68126500  | -0.25850600 | 1.54247400  |
| H | 1.06398300  | 0.71754800  | 2.55071100  |
| C | 2.74655500  | -0.00751100 | -0.86358300 |
| H | 1.16501900  | 1.16148000  | -1.71944800 |
| C | 3.30033700  | -0.52637600 | 0.31313300  |
| H | 3.12256800  | -0.66800000 | 2.44537700  |
| H | 3.20095500  | -0.20151500 | -1.82798900 |
| O | 4.42575100  | -1.29680500 | 0.36995100  |
| H | -0.67119900 | 1.88504300  | 1.50349900  |
| C | -0.01691800 | 3.38265800  | 0.08695000  |
| H | -0.92493300 | 3.98622300  | 0.17923300  |
| H | 0.75519200  | 3.80886600  | 0.73388900  |
| H | 0.31823600  | 3.45309900  | -0.95030200 |
| C | 5.09532700  | -1.59682600 | -0.84407200 |
| H | 5.44790600  | -0.68779200 | -1.34841000 |
| H | 5.95481500  | -2.21096600 | -0.57081700 |
| H | 4.45369000  | -2.16159900 | -1.53288600 |

### TS5a

SCF done: -937.9124839

|   |             |             |             |
|---|-------------|-------------|-------------|
| C | -1.51868100 | -0.62849000 | -0.92377300 |
| C | -2.89916300 | -0.65522000 | -0.43754100 |
| C | -3.28851100 | -0.17825400 | 0.83790900  |
| C | -3.90739500 | -1.16860700 | -1.27646400 |
| C | -4.61101200 | -0.19422700 | 1.23467800  |
| H | -2.53573700 | 0.15070500  | 1.54711600  |

|    |             |             |             |   |             |             |             |
|----|-------------|-------------|-------------|---|-------------|-------------|-------------|
| C  | -5.24703800 | -1.15729000 | -0.90006600 | H | -8.02696100 | -0.56426700 | -0.89604200 |
| H  | -3.65270400 | -1.54108300 | -2.26272700 | C | -0.98250100 | 1.83303300  | -0.20399700 |
| C  | -5.61023200 | -0.67054800 | 0.36413200  | C | -0.17981100 | 2.38958700  | 0.99991600  |
| H  | -4.90341800 | 0.14001700  | 2.22406100  | C | -0.81638100 | 2.75009800  | -1.43508600 |
| H  | -5.99252200 | -1.53396200 | -1.58937100 | H | -2.04497800 | 1.81675100  | 0.05387600  |
| C  | -0.99269800 | -1.75435400 | -1.75112000 | C | -0.07436800 | 3.93169500  | 0.97511400  |
| H  | -0.58076300 | -1.35771000 | -2.68644400 | H | 0.82988200  | 1.96546400  | 1.00451900  |
| H  | -0.13681700 | -2.21209900 | -1.24062200 | H | -0.66003200 | 2.06059100  | 1.93065800  |
| H  | -1.73849100 | -2.52634500 | -1.93449200 | C | -1.42899900 | 4.14416800  | -1.16101100 |
| C  | -0.55716000 | 0.40338400  | -0.58583800 | H | 0.25009800  | 2.83253000  | -1.66316500 |
| H  | -0.63982900 | -0.33206400 | 0.38986000  | H | -1.28612600 | 2.29792000  | -2.31658300 |
| O  | 0.66266900  | 0.28538900  | -1.10429700 | C | -1.31054300 | 4.56401500  | 0.32404600  |
| Fe | 2.33678300  | -0.09374400 | -0.27312300 | H | 0.82006200  | 4.22948500  | 0.41484300  |
| Br | 4.13917600  | 1.47264800  | 0.00427400  | H | 0.06611100  | 4.30649900  | 1.99425500  |
| Br | 1.31023700  | -1.53421900 | 1.76578200  | H | -2.48356700 | 4.15434900  | -1.46149800 |
| Br | 2.85933500  | -2.65540100 | -0.65086900 | H | -0.92093500 | 4.87778700  | -1.79712700 |
| O  | -6.87103100 | -0.63320000 | 0.84482000  | H | -2.20635300 | 4.24759100  | 0.87556000  |
| C  | -7.93322400 | -1.13371400 | 0.03597000  | H | -1.27544800 | 5.65569300  | 0.40455600  |
| H  | -7.79094100 | -2.19571700 | -0.19507200 |   |             |             |             |
| H  | -8.83987100 | -1.00995000 | 0.62812900  |   |             |             |             |

### Cartesian Coordinates for the Stationary Points Given in Fig. 2.

#### TS6a

SCF done: -937.9066379

|    |             |             |             |    |             |             |             |
|----|-------------|-------------|-------------|----|-------------|-------------|-------------|
| C  | 1.79547000  | 0.80026000  | 0.31482600  | Br | -3.24605400 | 0.65528200  | 1.75120300  |
| C  | 0.37251000  | 0.61268500  | 0.30601600  | Br | -2.98420800 | 1.40800700  | -1.22747400 |
| H  | -0.21106000 | 1.51646900  | 0.11792000  | C  | 2.75250400  | -0.31024600 | 0.31135100  |
| O  | -0.23651400 | -0.52706700 | 0.09386300  | C  | 4.08873000  | -0.12427300 | 0.74857000  |
| Fe | -2.12836000 | -0.84026500 | -0.12759900 | C  | 2.39462900  | -1.59430700 | -0.15629700 |
| Br | -2.95100300 | -3.01875000 | -0.73101000 | C  | 5.00758300  | -1.15412500 | 0.71841100  |
|    |             |             |             | H  | 4.41205800  | 0.83681300  | 1.13290300  |
|    |             |             |             | C  | 3.31786800  | -2.63243400 | -0.20658300 |

|   |             |             |             |
|---|-------------|-------------|-------------|
| H | 1.37961400  | -1.76929800 | -0.48490900 |
| C | 4.63289200  | -2.42283900 | 0.23429200  |
| H | 6.02605600  | -1.01256200 | 1.06345200  |
| H | 3.00251700  | -3.59691500 | -0.58525400 |
| C | 0.74806100  | 0.73962700  | 2.09179000  |
| H | 0.93633000  | -0.29300900 | 2.37074300  |
| H | 1.47186100  | 1.42994600  | 2.52193200  |
| H | -0.26661100 | 1.05219600  | 2.34740800  |
| O | 5.60400200  | -3.35966000 | 0.23926200  |
| C | 5.29894800  | -4.67113500 | -0.23349700 |
| H | 4.99307200  | -4.65355200 | -1.28570300 |
| H | 6.22121200  | -5.24340200 | -0.13313900 |
| H | 4.51187800  | -5.13814700 | 0.36913800  |
| C | 2.32835900  | 2.21541300  | 0.13169100  |
| C | 2.90934000  | 2.29837500  | -1.32364300 |
| C | 1.36167900  | 3.39445700  | 0.35430000  |
| H | 3.16158600  | 2.35680100  | 0.83012400  |
| C | 3.02015600  | 3.75579100  | -1.82703700 |
| H | 2.27232900  | 1.72252800  | -2.00531900 |
| H | 3.88980600  | 1.81295800  | -1.33598500 |
| C | 2.14686300  | 4.72768300  | 0.34620000  |
| H | 0.60797700  | 3.40912800  | -0.44087000 |
| H | 0.81412300  | 3.30409200  | 1.29725700  |
| C | 3.31097500  | 4.72395900  | -0.67516800 |
| H | 2.08664400  | 4.05228800  | -2.32002700 |
| H | 3.80112000  | 3.81259700  | -2.59267000 |
| H | 2.53667000  | 4.93213500  | 1.35023000  |
| H | 1.44718500  | 5.53840900  | 0.11728300  |
| H | 4.24501900  | 4.42309700  | -0.18270200 |
| H | 3.48292900  | 5.73592600  | -1.05572000 |

## IM2a

SCF done: -937.9201298

|    |             |             |             |
|----|-------------|-------------|-------------|
| C  | 1.87575400  | 0.81948400  | 0.47882800  |
| C  | 0.37688900  | 0.65893500  | 0.73215800  |
| H  | -0.10308600 | 1.55224600  | 0.30389100  |
| O  | -0.18781500 | -0.48672000 | 0.21854900  |
| Fe | -0.86200400 | -1.02457100 | -1.44209600 |
| Br | 0.26058600  | -2.98851300 | -2.38889400 |
| Br | -3.45734000 | -0.70758100 | -1.67201900 |
| Br | -1.31932300 | 1.15945400  | -2.87525000 |
| C  | 2.76687000  | -0.27797000 | 0.43116400  |
| C  | 4.17536300  | -0.11132300 | 0.18767900  |
| C  | 2.30441400  | -1.62529200 | 0.60752700  |
| C  | 5.02511900  | -1.18186200 | 0.11717700  |
| H  | 4.59342500  | 0.87705800  | 0.04632700  |
| C  | 3.15717700  | -2.70556700 | 0.55053600  |
| H  | 1.24342500  | -1.78120900 | 0.75017800  |
| C  | 4.52508300  | -2.50030900 | 0.28436100  |
| H  | 6.08460700  | -1.05717900 | -0.07690700 |
| H  | 2.75197100  | -3.70308700 | 0.66033500  |
| C  | 0.13832400  | 0.70031800  | 2.27094800  |
| H  | 0.59088500  | -0.17874600 | 2.73749400  |
| H  | 0.52554600  | 1.59999800  | 2.75558900  |
| H  | -0.94298200 | 0.65555700  | 2.42128500  |
| O  | 5.42854600  | -3.47128100 | 0.16485200  |
| C  | 5.01440700  | -4.84380500 | 0.25948000  |
| H  | 4.27417900  | -5.07819300 | -0.51092000 |
| H  | 5.91804400  | -5.42956400 | 0.09699900  |
| H  | 4.60726900  | -5.05888900 | 1.25219000  |
| C  | 2.36266600  | 2.20986100  | 0.18728800  |
| C  | 2.23133800  | 2.38572500  | -1.38167600 |
| C  | 1.67658900  | 3.39311100  | 0.90541400  |

|   |            |            |             |
|---|------------|------------|-------------|
| H | 3.42358300 | 2.28543100 | 0.43769000  |
| C | 2.11623200 | 3.86979900 | -1.78396400 |
| H | 1.36049100 | 1.83865600 | -1.75685300 |
| H | 3.11189100 | 1.92346600 | -1.84106700 |
| C | 2.43155600 | 4.70616500 | 0.59140700  |
| H | 0.63399200 | 3.48092500 | 0.58645500  |
| H | 1.66324900 | 3.23387000 | 1.98718800  |
| C | 2.95301500 | 4.76677200 | -0.86641500 |
| H | 1.06605900 | 4.18174700 | -1.74853400 |
| H | 2.43015100 | 3.97280100 | -2.82828200 |
| H | 3.26961000 | 4.82281800 | 1.28851400  |
| H | 1.75375100 | 5.54473100 | 0.78363300  |
| H | 4.00022500 | 4.43870300 | -0.90661100 |
| H | 2.94630600 | 5.80039400 | -1.22675700 |

### TS7a

SCF done: -937.9041559

|    |             |             |             |
|----|-------------|-------------|-------------|
| C  | 1.81443300  | -0.41276600 | -0.90929600 |
| C  | 0.63834900  | -1.01024000 | -1.54957200 |
| O  | -0.50726600 | -0.36350000 | -1.60982900 |
| Fe | -1.96210600 | -0.13495200 | -0.37414900 |
| Br | -3.11765100 | 1.99072900  | -0.34140600 |
| Br | -3.27169500 | -2.38719300 | -0.08764100 |
| Br | -1.09243100 | -1.32298900 | 1.82060900  |
| H  | 1.45372700  | -0.57914100 | -2.39264800 |
| C  | 3.01336700  | -1.32207500 | -0.67879800 |
| C  | 4.40415800  | -0.76896000 | -1.11871900 |
| C  | 3.02209600  | -1.85502100 | 0.78675800  |
| H  | 2.83877800  | -2.21417700 | -1.27972700 |
| C  | 5.54411100  | -1.31458600 | -0.23717900 |
| H  | 4.42249600  | 0.32288100  | -1.12347800 |
| H  | 4.57330200  | -1.07899600 | -2.15737300 |

|   |             |             |             |
|---|-------------|-------------|-------------|
| C | 4.03049300  | -3.01670600 | 0.92082700  |
| H | 3.28208000  | -1.05351600 | 1.48228800  |
| H | 2.01892100  | -2.18540500 | 1.07382800  |
| C | 5.32395100  | -2.79745500 | 0.09169500  |
| H | 5.60908700  | -0.73908400 | 0.69586200  |
| H | 6.50105300  | -1.17002000 | -0.74989300 |
| H | 3.55158900  | -3.95373600 | 0.61488200  |
| H | 4.27575500  | -3.13206500 | 1.98216500  |
| H | 5.26353100  | -3.35741100 | -0.85087700 |
| H | 6.18779100  | -3.20314700 | 0.62805900  |
| C | 1.83016600  | 0.99629400  | -0.51723300 |
| C | 2.77954500  | 1.47000200  | 0.42920500  |
| C | 0.90540100  | 1.94815900  | -1.01540000 |
| C | 2.76589900  | 2.77270700  | 0.88454800  |
| H | 3.51759500  | 0.80162400  | 0.84822800  |
| C | 0.90364700  | 3.26655600  | -0.58659600 |
| H | 0.18080200  | 1.65344500  | -1.75942900 |
| C | 1.82029400  | 3.68980500  | 0.38812700  |
| H | 3.47366900  | 3.11137300  | 1.63318900  |
| H | 0.16686600  | 3.94442800  | -0.99812200 |
| O | 1.88081200  | 4.93382600  | 0.89849900  |
| C | 0.90658300  | 5.89551400  | 0.48681200  |
| H | -0.10813500 | 5.55184900  | 0.71385700  |
| H | 1.12478400  | 6.79785300  | 1.05780500  |
| H | 0.99172100  | 6.11190400  | -0.58406400 |
| C | 0.50701800  | -2.51566900 | -1.79989600 |
| H | 0.24537800  | -3.00936500 | -0.85887500 |
| H | -0.32699600 | -2.64589800 | -2.49008700 |
| H | 1.38774900  | -2.99974000 | -2.22341800 |

### IM3a

SCF done: -937.9609773

|    |             |             |             |
|----|-------------|-------------|-------------|
| C  | -1.78148300 | 0.73782500  | 1.39901000  |
| C  | -0.27362200 | 0.69747000  | 1.45191700  |
| O  | 0.37383200  | -0.09296800 | 0.74603700  |
| Fe | 2.34009100  | -0.52322900 | 0.48944000  |
| Br | 3.45900100  | -1.18638700 | 2.49795100  |
| Br | 2.52205900  | -1.44237100 | -1.89669500 |
| Br | 3.20816200  | 1.44085400  | -0.96950500 |
| C  | -2.18459700 | 1.98967800  | 0.50920500  |
| C  | -1.69042800 | 1.91348900  | -0.95645900 |
| C  | -3.70111700 | 2.24121700  | 0.55375100  |
| H  | -1.70522700 | 2.85656100  | 0.98555700  |
| C  | -2.53057000 | 2.80364600  | -1.90489100 |
| H  | -1.73407900 | 0.88104600  | -1.31409000 |
| H  | -0.63674600 | 2.21388600  | -1.00215900 |
| C  | -4.04231700 | 3.62888800  | -0.04276300 |
| H  | -4.20665600 | 1.44873400  | -0.00851100 |
| H  | -4.07569400 | 2.17282900  | 1.58162800  |
| C  | -3.07471300 | 4.03924600  | -1.17886100 |
| H  | -3.37391100 | 2.22500600  | -2.30252500 |
| H  | -1.92399200 | 3.09314700  | -2.76929200 |
| H  | -4.02160500 | 4.38789800  | 0.74812000  |
| H  | -5.07173700 | 3.60510000  | -0.41810400 |
| H  | -2.23286800 | 4.61165100  | -0.76746000 |
| H  | -3.58120400 | 4.70957800  | -1.88140300 |
| C  | -2.47973300 | -0.56848700 | 1.05702700  |
| C  | -3.55474000 | -0.97255300 | 1.86974100  |
| C  | -2.14209000 | -1.39489100 | -0.02272000 |
| C  | -4.26747600 | -2.13578700 | 1.61553000  |
| H  | -3.83856600 | -0.36229300 | 2.72389300  |
| C  | -2.84682500 | -2.57183300 | -0.28999500 |
| H  | -1.30460500 | -1.14721400 | -0.66189700 |
| C  | -3.91845200 | -2.94847800 | 0.52691500  |

|   |             |             |             |
|---|-------------|-------------|-------------|
| H | -5.09349000 | -2.44055000 | 2.24948100  |
| H | -2.54441100 | -3.18267000 | -1.13204500 |
| O | -4.67092200 | -4.06991400 | 0.35598900  |
| C | -4.34863700 | -4.93975300 | -0.72011700 |
| H | -3.33186800 | -5.34087200 | -0.62451800 |
| H | -5.06515300 | -5.76053300 | -0.66761900 |
| H | -4.44690500 | -4.43603200 | -1.69007600 |
| C | 0.45148400  | 1.65652500  | 2.35594400  |
| H | -0.21111200 | 2.38785500  | 2.81966400  |
| H | 0.94646900  | 1.07039300  | 3.14086300  |
| H | 1.24254400  | 2.16720700  | 1.79690800  |
| H | -2.09713200 | 1.01956600  | 2.41181300  |

### TS8a

SCF done: -937.9149435

|    |             |             |             |
|----|-------------|-------------|-------------|
| C  | -1.52556100 | 0.85688000  | -0.40298700 |
| C  | -1.35037100 | 0.85841700  | -1.88334500 |
| H  | -0.65223800 | 1.67696200  | -2.11094700 |
| H  | -0.86746300 | -0.04961200 | -2.23652600 |
| H  | -2.28356900 | 1.04485300  | -2.41866600 |
| C  | -0.79037700 | -0.11666000 | 0.40787800  |
| O  | 0.26370800  | -0.75669600 | -0.12300700 |
| Fe | 2.04962800  | -0.13557500 | -0.25225200 |
| Br | 2.23148900  | 2.00414900  | -1.45006100 |
| Br | 3.26728700  | -0.44654400 | 2.05067400  |
| Br | 3.75823300  | -2.07356700 | -0.53082000 |
| H  | -0.69676800 | 0.17479600  | 1.46376700  |
| C  | -2.16471500 | -0.93599600 | 0.26306000  |
| C  | -3.21988600 | -0.85561000 | 1.20048800  |
| C  | -2.21165700 | -1.94962800 | -0.71271900 |
| C  | -4.27533600 | -1.74447300 | 1.15630600  |
| H  | -3.19984700 | -0.10990700 | 1.98815600  |



|   |             |             |             |    |             |             |             |
|---|-------------|-------------|-------------|----|-------------|-------------|-------------|
| C | -3.26796800 | -2.84676400 | -0.76928700 | H  | -0.66792800 | -2.66918400 | 1.69692600  |
| H | -1.37054400 | -2.06314200 | -1.38628800 | H  | 0.33908500  | -3.76409200 | 0.72802300  |
| C | -4.31658000 | -2.74481600 | 0.16302500  | H  | 0.98514900  | -3.03415400 | 2.20559800  |
| H | -5.08086100 | -1.70313300 | 1.88124700  | C  | 0.63956500  | -0.33674500 | 1.34463800  |
| H | -3.26140200 | -3.62959900 | -1.51767000 | O  | -0.73394700 | -0.11244200 | 1.55449900  |
| O | -5.38990600 | -3.55606500 | 0.20079500  | Fe | -2.15988500 | -0.04175400 | 0.49448100  |
| C | -5.50214400 | -4.60785200 | -0.75894900 | Br | -4.28489800 | -1.02121000 | 0.09350300  |
| H | -6.43822000 | -5.11660400 | -0.52979200 | Br | -2.60713000 | 2.15365800  | -0.40548200 |
| H | -5.54208900 | -4.21094200 | -1.77943300 | Br | -0.45179100 | -1.55863000 | -1.13731100 |
| H | -4.67046800 | -5.31542800 | -0.67024000 | H  | 1.05654600  | -0.56769300 | 2.33891300  |
| C | -2.25218100 | 1.99164800  | 0.25776400  | C  | 1.33997800  | 0.93905000  | 0.88806700  |
| C | -1.22345100 | 3.18315300  | 0.39224700  | C  | 2.11850000  | 1.63963900  | 1.82644400  |
| C | -3.54311900 | 2.46067500  | -0.43422700 | C  | 1.19704300  | 1.49964200  | -0.38769000 |
| H | -2.50073800 | 1.69657900  | 1.28105800  | C  | 2.74942300  | 2.83228400  | 1.50311500  |
| C | -1.95132800 | 4.54343700  | 0.45954600  | H  | 2.22926700  | 1.24297100  | 2.83272300  |
| H | -0.50257900 | 3.18821100  | -0.42980300 | C  | 1.82965600  | 2.69501500  | -0.73181000 |
| H | -0.63825000 | 3.01824000  | 1.30260700  | H  | 0.58608900  | 1.01102900  | -1.13598000 |
| C | -4.27387000 | 3.51021400  | 0.43439500  | C  | 2.61031100  | 3.37078400  | 0.21445100  |
| H | -3.29294600 | 2.89453400  | -1.40860700 | H  | 3.35053000  | 3.36888700  | 2.22943700  |
| H | -4.20139900 | 1.60669700  | -0.63030900 | H  | 1.69334400  | 3.09196800  | -1.73035600 |
| C | -3.29067300 | 4.43353600  | 1.19739600  | O  | 3.26438700  | 4.54061300  | -0.01277100 |
| H | -2.12504100 | 4.92350800  | -0.55463400 | C  | 3.12838400  | 5.15492400  | -1.28748800 |
| H | -1.29285700 | 5.26883200  | 0.94867400  | H  | 3.71372300  | 6.07413800  | -1.24110800 |
| H | -4.93342500 | 3.00340200  | 1.14851400  | H  | 3.52259700  | 4.51562800  | -2.08752800 |
| H | -4.92517400 | 4.10733400  | -0.21302800 | H  | 2.08216300  | 5.40191500  | -1.50556400 |
| H | -3.10915500 | 4.03908100  | 2.20576800  | C  | 2.30289600  | -1.83242200 | -0.00014900 |
| H | -3.73575700 | 5.42405100  | 1.33610000  | C  | 3.36781000  | -1.74824900 | 1.14487100  |
|   |             |             |             | C  | 2.53986700  | -3.12345400 | -0.80771200 |
|   |             |             |             | H  | 2.47995600  | -0.98146900 | -0.66676700 |
|   |             |             |             | C  | 4.70913600  | -2.40897200 | 0.74412200  |
|   |             |             |             | H  | 2.99535300  | -2.22952100 | 2.05623300  |
|   |             |             |             | H  | 3.53384600  | -0.69566300 | 1.39028800  |

#### IM4a

SCF done: -937.9388699

|   |            |             |            |
|---|------------|-------------|------------|
| C | 0.88208500 | -1.66186600 | 0.55706300 |
| C | 0.34315900 | -2.85776100 | 1.33417100 |

|   |            |             |             |
|---|------------|-------------|-------------|
| C | 3.88548100 | -3.04403700 | -1.56498100 |
| H | 2.54961900 | -3.98082600 | -0.12391900 |
| H | 1.72656000 | -3.30068100 | -1.51670100 |
| C | 4.96722300 | -2.28253800 | -0.76139100 |
| H | 4.69971600 | -3.47150500 | 1.01785100  |
| H | 5.52158100 | -1.95263100 | 1.31995600  |
| H | 3.73397400 | -2.55519600 | -2.53418500 |
| H | 4.22680300 | -4.06222800 | -1.78350100 |
| H | 4.96172300 | -1.21962200 | -1.03456800 |
| H | 5.96439400 | -2.65722000 | -1.01525900 |

### TS9a

SCF done: -937.9094338

|    |             |             |             |
|----|-------------|-------------|-------------|
| C  | -1.19483700 | -1.56364900 | -0.76302100 |
| C  | -0.33491300 | -2.73123400 | -1.08247900 |
| H  | 0.13857100  | -3.06000100 | -0.14863200 |
| H  | -0.92340700 | -3.57493200 | -1.45714700 |
| H  | 0.46490800  | -2.45696100 | -1.77193300 |
| C  | -0.75458200 | -0.23548400 | -1.26012500 |
| O  | 0.57945000  | -0.03763400 | -1.38684800 |
| Fe | 1.88737700  | -0.10773000 | -0.03550500 |
| Br | 4.17763500  | -1.07853600 | -0.77410700 |
| Br | 3.60723600  | 1.79850300  | 0.21248700  |
| Br | 0.67953500  | -1.07642100 | 1.93745700  |
| H  | -1.18427200 | -0.57099300 | -2.27734100 |
| C  | -1.57362900 | 0.99655200  | -0.90254200 |
| C  | -2.51691800 | 1.51164100  | -1.80566600 |
| C  | -1.35765300 | 1.68430300  | 0.29695900  |
| C  | -3.23449600 | 2.66539100  | -1.51748300 |
| H  | -2.67888900 | 1.01701200  | -2.76105000 |
| C  | -2.07356000 | 2.84181100  | 0.60159300  |
| H  | -0.63728600 | 1.30724200  | 1.01551300  |

|   |             |             |             |
|---|-------------|-------------|-------------|
| C | -3.01673300 | 3.34149700  | -0.30787300 |
| H | -3.95686900 | 3.07120300  | -2.21769000 |
| H | -1.88470600 | 3.34355600  | 1.54287800  |
| O | -3.76189000 | 4.46168600  | -0.11333700 |
| C | -3.55082400 | 5.21862000  | 1.07186000  |
| H | -4.22822600 | 6.07092900  | 1.00668600  |
| H | -3.78855700 | 4.63632700  | 1.97084700  |
| H | -2.51780300 | 5.58095600  | 1.13899700  |
| C | -2.56495800 | -1.77352400 | -0.23068900 |
| C | -3.55768200 | -2.09159800 | -1.41754800 |
| C | -2.65599400 | -2.89743100 | 0.83132000  |
| H | -2.89066600 | -0.83297600 | 0.22307500  |
| C | -4.80773000 | -2.85256200 | -0.92424200 |
| H | -3.04878300 | -2.67716500 | -2.19154900 |
| H | -3.83974600 | -1.13617900 | -1.87077600 |
| C | -4.05032200 | -2.86604900 | 1.49731000  |
| H | -2.48754600 | -3.86785700 | 0.35101900  |
| H | -1.87218600 | -2.76884700 | 1.58221100  |
| C | -5.17415300 | -2.46150900 | 0.51222200  |
| H | -4.62835500 | -3.93349800 | -0.97050300 |
| H | -5.63754200 | -2.64815100 | -1.60946300 |
| H | -4.03404400 | -2.17204000 | 2.34437100  |
| H | -4.25496200 | -3.85858800 | 1.91343500  |
| H | -5.34191100 | -1.37791300 | 0.55469600  |
| H | -6.12033300 | -2.92732100 | 0.80505100  |

### IM5a

SCF done: -937.9689996

|   |             |            |             |
|---|-------------|------------|-------------|
| C | 0.07250700  | 2.42951900 | -1.46483000 |
| C | -0.28558000 | 2.14848800 | -2.94316300 |
| H | -1.03939000 | 1.36005000 | -3.01209900 |
| H | -0.67399000 | 3.04970600 | -3.42136800 |

|    |             |             |             |   |             |             |             |
|----|-------------|-------------|-------------|---|-------------|-------------|-------------|
| H  | 0.59597800  | 1.82868200  | -3.50818100 | H | 6.28515800  | -0.74281600 | 1.86114300  |
| C  | 0.75198700  | 1.18164400  | -0.92354000 | H | 6.83695500  | -0.86257700 | 0.16144500  |
| O  | 0.04745900  | 0.14106100  | -0.89221400 | C | -1.15777700 | 2.79092300  | -0.58331000 |
| Fe | -0.63684700 | -1.61250400 | -0.28439900 | C | -0.75087700 | 2.97151300  | 0.90527600  |
| Br | -3.21398500 | -1.55504000 | -0.48811800 | C | -1.89968900 | 4.04959600  | -1.06590900 |
| Br | 0.72267700  | -3.54179100 | -0.76105200 | H | -1.85058400 | 1.94284200  | -0.65448800 |
| Br | -1.55976900 | -1.21816400 | 2.10832500  | C | -1.75592200 | 3.83207700  | 1.70775000  |
| H  | 0.77022400  | 3.27114400  | -1.43812100 | H | 0.24246300  | 3.43715900  | 0.96149200  |
| C  | 2.14937100  | 1.14266600  | -0.50524300 | H | -0.65927600 | 1.98453800  | 1.37283500  |
| C  | 2.93392300  | 2.31147100  | -0.34656600 | C | -3.23859000 | 4.22603400  | -0.30645500 |
| C  | 2.75908700  | -0.10335100 | -0.23854200 | H | -1.25420000 | 4.92374600  | -0.90106800 |
| C  | 4.24675000  | 2.23540800  | 0.07343000  | H | -2.09857700 | 4.01364200  | -2.14096500 |
| H  | 2.50840100  | 3.28980800  | -0.53366000 | C | -3.17407400 | 3.69221300  | 1.14319700  |
| C  | 4.07879800  | -0.19234100 | 0.17253200  | H | -1.45898900 | 4.88837800  | 1.66809800  |
| H  | 2.19613000  | -1.01971700 | -0.37734800 | H | -1.72662900 | 3.54569100  | 2.76430200  |
| C  | 4.83477800  | 0.98252000  | 0.33886800  | H | -4.03922800 | 3.71111900  | -0.84965200 |
| H  | 4.84930600  | 3.12670000  | 0.20938300  | H | -3.50377400 | 5.28988400  | -0.30272500 |
| H  | 4.51064600  | -1.16811100 | 0.35704100  | H | -3.46382100 | 2.63430400  | 1.16792100  |
| O  | 6.11901900  | 1.01476100  | 0.74015200  | H | -3.89687000 | 4.22189300  | 1.77310700  |
| C  | 6.78401400  | -0.21316700 | 1.04218000  |   |             |             |             |
| H  | 7.79170300  | 0.06602100  | 1.34930100  |   |             |             |             |

### Cartesian Coordinates for the Stationary Points Given in Fig. 3.

48

IM6a SCF done: -1102.293735

|   |            |             |             |   |            |             |             |
|---|------------|-------------|-------------|---|------------|-------------|-------------|
| C | 2.12390000 | 0.11534100  | 1.02247100  | H | 4.85223500 | 0.01955500  | 1.54740600  |
| C | 3.28115300 | -0.33310000 | 0.10763700  | C | 4.04512100 | -1.32329600 | -1.98639100 |
| C | 4.60680000 | -0.34232100 | 0.55430900  | H | 2.00271600 | -0.91920800 | -1.54677700 |
| C | 3.02232300 | -0.85180400 | -1.17378400 | C | 5.37025600 | -1.31033200 | -1.52873300 |
| C | 5.64532400 | -0.82421000 | -0.24357300 | H | 6.65642000 | -0.81557500 | 0.14528500  |
|   |            |             |             | H | 3.83852000 | -1.71891500 | -2.97494000 |
|   |            |             |             | C | 1.67415500 | -1.07621600 | 1.88878500  |

|    |             |             |             |
|----|-------------|-------------|-------------|
| H  | 0.82254300  | -0.84245800 | 2.53216700  |
| H  | 1.41100000  | -1.93255400 | 1.26358900  |
| H  | 2.50309200  | -1.38336500 | 2.53185400  |
| C  | 1.03457500  | 0.63318800  | 0.14005300  |
| H  | 1.28839300  | 1.48261500  | -0.50654800 |
| O  | -0.14126000 | 0.22436300  | 0.08973100  |
| Fe | -1.65283300 | -1.31158300 | 0.91758500  |
| Br | -1.89230600 | -2.40851200 | 3.01644700  |
| Br | -2.75437600 | -1.12616200 | -1.58171400 |
| Br | -0.60801100 | -3.14988900 | -0.79119600 |
| Fe | -1.80669200 | 1.36656900  | -0.84636600 |
| Br | -2.96728400 | 1.10685500  | 1.34831700  |
| Br | -0.80065000 | 3.82172600  | -0.72858600 |
| Br | -1.21003900 | 2.07834200  | -3.22163600 |
| C  | 2.52128500  | 1.36494500  | 1.93431900  |
| C  | 3.26630700  | 2.51102700  | 1.18219100  |
| C  | 1.33217700  | 1.94249300  | 2.73238900  |
| H  | 3.21167000  | 0.93248600  | 2.67007700  |
| C  | 3.05336000  | 3.89161500  | 1.84028700  |
| H  | 2.96246100  | 2.56571700  | 0.13107000  |
| H  | 4.33625600  | 2.28515800  | 1.15929200  |
| C  | 1.82252700  | 2.91336800  | 3.83016700  |
| H  | 0.65653300  | 2.47591400  | 2.05095300  |
| H  | 0.73506200  | 1.15184900  | 3.19406000  |
| C  | 3.02601000  | 3.77126000  | 3.36801700  |
| H  | 2.11161000  | 4.33390700  | 1.49286800  |
| H  | 3.84777900  | 4.57199400  | 1.51536200  |
| H  | 2.09423900  | 2.34343200  | 4.72635900  |
| H  | 0.98560800  | 3.55810600  | 4.11928200  |
| H  | 3.96606000  | 3.31290200  | 3.70293300  |
| H  | 2.98832000  | 4.76110100  | 3.83447900  |
| O  | 6.30237000  | -1.79286600 | -2.39149400 |

|   |            |             |             |
|---|------------|-------------|-------------|
| C | 7.66062900 | -1.82666300 | -1.97390100 |
| H | 7.79438300 | -2.46046600 | -1.08838100 |
| H | 8.21967400 | -2.25216300 | -2.80796800 |
| H | 8.04211100 | -0.82043600 | -1.75957300 |

### TS10a

SCF done: -1102.279164

|    |             |             |             |
|----|-------------|-------------|-------------|
| C  | 2.03873200  | -1.04582200 | -0.48550300 |
| C  | 3.37326200  | -0.61347900 | -0.91087600 |
| C  | 3.73204700  | 0.75703900  | -0.91105400 |
| C  | 4.33131300  | -1.53768700 | -1.37066400 |
| C  | 4.98018000  | 1.17086400  | -1.34133100 |
| H  | 3.00866400  | 1.50974800  | -0.61634400 |
| C  | 5.59193300  | -1.13548900 | -1.79405100 |
| H  | 4.10313800  | -2.59868700 | -1.37969300 |
| C  | 5.92624400  | 0.22965000  | -1.78445100 |
| H  | 5.24554200  | 2.22214700  | -1.36232700 |
| H  | 6.30256700  | -1.88068500 | -2.12959000 |
| C  | 1.31615100  | -0.28111500 | 0.45493000  |
| H  | 1.80825800  | 0.58273200  | 0.90000000  |
| O  | 0.01052800  | -0.29789000 | 0.61062100  |
| Fe | -1.08274500 | 1.75547300  | 0.67448300  |
| Br | 0.78191200  | 2.98910200  | 1.96860000  |
| Br | -3.05908400 | 0.29658100  | 1.44233600  |
| Br | -1.90057200 | 4.21791800  | 1.08144500  |
| Fe | -1.61217500 | -0.95728800 | -0.37586000 |
| Br | -1.14153600 | 1.37360400  | -1.84130300 |
| Br | -2.55071200 | -2.31347600 | -2.33248100 |
| Br | -2.02819000 | -3.51853800 | 0.42499900  |
| O  | 7.11281200  | 0.73249100  | -2.18487800 |
| C  | 8.11041000  | -0.15775800 | -2.68009100 |
| H  | 7.75790300  | -0.69704800 | -3.56688800 |

|   |            |             |             |    |             |             |             |
|---|------------|-------------|-------------|----|-------------|-------------|-------------|
| H | 8.95887600 | 0.47021500  | -2.95152100 | C  | -5.38159000 | 1.00358200  | -1.96261200 |
| H | 8.42087000 | -0.87614200 | -1.91238200 | H  | -3.62127500 | 2.03300900  | -2.52760400 |
| C | 2.27429100 | -1.67671700 | 1.61306900  | C  | -5.94618300 | 0.00592500  | -1.13417600 |
| C | 3.34111600 | -0.88427500 | 2.36257900  | H  | -5.57568200 | -1.50198700 | 0.35607300  |
| C | 1.10688600 | -2.16311200 | 2.45955700  | H  | -6.00010500 | 1.57566500  | -2.64246900 |
| H | 2.70985600 | -2.49505500 | 1.04110000  | C  | -0.98295300 | 0.49761200  | 0.29304100  |
| C | 2.78153500 | -0.26562000 | 3.65001400  | H  | -1.38037000 | -0.43419500 | 0.70967400  |
| H | 3.80479400 | -0.12801300 | 1.71974900  | O  | 0.37678700  | 0.27672900  | 0.00451800  |
| H | 4.15292600 | -1.58266500 | 2.61051500  | Fe | 1.96100400  | 1.33209700  | -0.59690400 |
| C | 1.66223400 | -2.57006000 | 3.84516600  | Br | 2.17890600  | 3.70388500  | -1.07668800 |
| H | 0.35205000 | -1.38238500 | 2.59126600  | Br | 1.98954500  | -2.62584800 | -1.55667500 |
| H | 0.60356100 | -3.00417800 | 1.97682800  | Br | 2.44382200  | 0.03949800  | -2.89256000 |
| C | 2.23954100 | -1.35403900 | 4.60703900  | Fe | 1.30251100  | -1.44257900 | 0.63191600  |
| H | 1.98057400 | 0.43757500  | 3.39357300  | Br | 3.48139000  | -0.01894000 | 1.02398400  |
| H | 3.55659200 | 0.32866900  | 4.14391000  | Br | 0.67836200  | -1.75719100 | 3.18330600  |
| H | 2.43195700 | -3.34099300 | 3.71545100  | Br | -0.87968600 | -3.12998300 | 0.97018000  |
| H | 0.85566900 | -3.03782800 | 4.41859100  | C  | -1.06651000 | 1.50142900  | -2.03864100 |
| H | 3.03721500 | -1.69462100 | 5.27675000  | H  | -0.35617500 | 0.75675800  | -2.43495700 |
| H | 1.46676900 | -0.91350100 | 5.24556900  | H  | -1.69680900 | 1.83130500  | -2.86174900 |
| C | 1.34671600 | -2.16610100 | -1.20706800 | H  | -0.43397700 | 2.33009100  | -1.69400700 |
| H | 0.60615800 | -2.67203300 | -0.58371900 | O  | -7.23538500 | -0.32809400 | -1.12809000 |
| H | 0.82226500 | -1.74099400 | -2.07342100 | C  | -8.15442800 | 0.32549900  | -2.01562800 |
| H | 2.04290600 | -2.91141900 | -1.59436100 | H  | -7.87215500 | 0.15999600  | -3.05989600 |

### IM7a

SCF done: -1102.293503

|   |             |             |             |   |             |            |            |
|---|-------------|-------------|-------------|---|-------------|------------|------------|
| C | -1.78585000 | 0.85119200  | -0.92235700 | C | -1.16780000 | 1.56281400 | 1.46216200 |
| C | -3.17166400 | 0.55532800  | -0.99078800 | C | -1.11081600 | 3.05008300 | 1.04155000 |
| C | -3.77952500 | -0.44677500 | -0.16303400 | C | -2.39504600 | 1.31665600 | 2.35256900 |
| C | -4.02763300 | 1.24910500  | -1.90064500 | H | -0.28188400 | 1.33016900 | 2.06471400 |
| C | -5.12226900 | -0.71999100 | -0.24255100 | C | -1.57960100 | 3.99219300 | 2.18327100 |
| H | -3.16738600 | -1.05684400 | 0.48953900  | H | -1.75353700 | 3.22496500 | 0.16955100 |
|   |             |             |             | H | -0.09420600 | 3.31201000 | 0.73424000 |

|   |             |            |            |
|---|-------------|------------|------------|
| C | -2.22740200 | 2.06786600 | 3.70125800 |
| H | -3.30174900 | 1.66460400 | 1.84054700 |
| H | -2.53125700 | 0.24792700 | 2.55003800 |
| C | -1.38099100 | 3.35467600 | 3.56252500 |
| H | -2.64440700 | 4.22715900 | 2.05467700 |
| H | -1.04443100 | 4.94436900 | 2.11327800 |
| H | -1.75981500 | 1.39884000 | 4.43144200 |
| H | -3.22089700 | 2.31288600 | 4.09392500 |
| H | -0.31816800 | 3.12222600 | 3.70309200 |
| H | -1.64336900 | 4.06327600 | 4.35516300 |

### TS11a

SCF done: -1102.280833

|    |             |             |             |
|----|-------------|-------------|-------------|
| C  | -1.99667700 | 0.31244700  | -0.79596200 |
| C  | -3.44069600 | 0.05437600  | -0.90339600 |
| C  | -4.05259500 | -1.17580800 | -0.57004900 |
| C  | -4.26549400 | 1.09486300  | -1.36988300 |
| C  | -5.42062700 | -1.34147100 | -0.67359400 |
| H  | -3.44452700 | -2.02761000 | -0.28173100 |
| C  | -5.64711700 | 0.94916600  | -1.44342500 |
| H  | -3.83121500 | 2.05162900  | -1.63962900 |
| C  | -6.23745200 | -0.27493000 | -1.09528700 |
| H  | -5.88851700 | -2.29321000 | -0.44719900 |
| H  | -6.24843000 | 1.78544000  | -1.77715500 |
| C  | -1.17050000 | -0.19112000 | 0.27017800  |
| H  | -1.35306400 | -1.04304600 | -0.62830300 |
| O  | 0.14022200  | 0.12210400  | 0.25701700  |
| Fe | 1.09404800  | 1.89798500  | 0.69571800  |
| Br | -0.12002700 | 3.76026200  | 1.64134700  |
| Br | 2.60319200  | 0.04467500  | -2.49149600 |
| Br | 2.15380600  | 2.85812800  | -1.51800400 |
| Fe | 1.77859000  | -1.07752600 | -0.31136500 |

|    |             |             |             |
|----|-------------|-------------|-------------|
| Br | 3.09581500  | 0.31609300  | 1.33518700  |
| Br | 2.36576500  | -3.44258600 | 0.64122500  |
| Br | 0.40370700  | -2.82615300 | -1.58818400 |
| C  | -1.33014200 | 1.12925300  | -1.86267300 |
| H  | -0.35687000 | 0.70947200  | -2.12685500 |
| H  | -1.94615700 | 1.20969500  | -2.75700800 |
| H  | -1.12162000 | 2.13214600  | -1.46568700 |
| O  | -7.56004400 | -0.53561200 | -1.14636600 |
| C  | -8.45006700 | 0.48976900  | -1.58456300 |
| H  | -8.23105400 | 0.79308600  | -2.61479000 |
| H  | -9.44796300 | 0.05395000  | -1.53964800 |
| H  | -8.40452000 | 1.36449500  | -0.92565600 |
| C  | -1.73148400 | -0.71715200 | 1.59758000  |
| C  | -1.23424100 | -2.14423800 | 1.94918800  |
| C  | -1.38901700 | 0.25999300  | 2.74352700  |
| H  | -2.81990500 | -0.73427000 | 1.50328200  |
| C  | -1.28161100 | -2.42246600 | 3.46957300  |
| H  | -0.20991300 | -2.28151100 | 1.59316300  |
| H  | -1.84778300 | -2.87948800 | 1.41288700  |
| C  | -2.18366400 | -0.11702300 | 4.01653800  |
| H  | -0.31220500 | 0.20711000  | 2.93869300  |
| H  | -1.60343500 | 1.29454200  | 2.46095700  |
| C  | -2.41451300 | -1.64149500 | 4.14610500  |
| H  | -0.32626100 | -2.13558200 | 3.92536600  |
| H  | -1.38964500 | -3.49849100 | 3.63999800  |
| H  | -3.14781200 | 0.40424300  | 4.01690900  |
| H  | -1.63240300 | 0.25459500  | 4.88705800  |
| H  | -3.36977300 | -1.91901300 | 3.68012000  |
| H  | -2.50062500 | -1.92165800 | 5.20107900  |

### IM8a

SCF done: -1102.324173

|    |             |             |             |
|----|-------------|-------------|-------------|
| C  | 1.91103500  | 0.19477800  | -1.65675200 |
| C  | 1.55809400  | -1.20851900 | -2.17100700 |
| H  | 1.72455400  | -1.96646100 | -1.39944000 |
| H  | 0.52061000  | -1.26903100 | -2.50873400 |
| H  | 2.21085100  | -1.45810600 | -3.01143400 |
| C  | 0.93014000  | 0.71403700  | -0.60945100 |
| O  | 0.00763600  | -0.02212900 | -0.19491900 |
| Fe | -0.36924300 | -2.39542400 | 0.59888600  |
| Br | 1.69666200  | -3.05250200 | 1.66059100  |
| Br | -2.98310100 | -1.04876900 | -1.70847600 |
| Br | -1.47946100 | -3.63799000 | -1.30456600 |
| Fe | -2.26301700 | 0.44725500  | 0.19926000  |
| Br | -2.22710200 | -1.33879100 | 1.97511800  |
| Br | -2.48422400 | 2.34552500  | 1.82548400  |
| Br | -2.75838800 | 2.47973600  | -1.17532700 |
| H  | 1.76700700  | 0.90574700  | -2.48500100 |
| C  | 3.38161900  | 0.30175300  | -1.25053900 |
| C  | 4.28990500  | 1.02181900  | -2.04346500 |
| C  | 3.88072800  | -0.38711800 | -0.14006600 |
| C  | 5.64259900  | 1.06528000  | -1.73197400 |
| H  | 3.93481300  | 1.55175100  | -2.92401600 |
| C  | 5.23784600  | -0.35026200 | 0.18903100  |
| H  | 3.21661400  | -0.98259600 | 0.48003800  |
| C  | 6.12842700  | 0.37982100  | -0.60786000 |
| H  | 6.34495900  | 1.61821800  | -2.34688000 |
| H  | 5.58221300  | -0.89938300 | 1.05710900  |
| O  | 7.46662800  | 0.48280500  | -0.38378300 |
| C  | 8.01923500  | -0.20829100 | 0.72839900  |
| H  | 9.08903300  | 0.00375700  | 0.71172000  |
| H  | 7.59497400  | 0.14715600  | 1.67580300  |
| H  | 7.86366200  | -1.29129600 | 0.64821900  |
| C  | 1.00442200  | 2.13145200  | -0.08932800 |

|   |             |            |             |
|---|-------------|------------|-------------|
| C | 1.70251400  | 2.12437300 | 1.31971100  |
| C | 1.63965800  | 3.19064700 | -1.00768800 |
| H | -0.03857200 | 2.41843800 | 0.07812600  |
| C | 2.25173200  | 3.52199200 | 1.68078200  |
| H | 2.51792400  | 1.39693200 | 1.33901300  |
| H | 0.96374000  | 1.79790500 | 2.05810000  |
| C | 1.37497900  | 4.60719700 | -0.44210600 |
| H | 2.71562100  | 3.01254100 | -1.08526900 |
| H | 1.23204000  | 3.12146100 | -2.02265500 |
| C | 1.37247400  | 4.63878100 | 1.10645400  |
| H | 3.27272800  | 3.62965100 | 1.29402600  |
| H | 2.32539800  | 3.60443200 | 2.77052500  |
| H | 0.41595200  | 4.98076700 | -0.81781200 |
| H | 2.14406500  | 5.28414400 | -0.83044700 |
| H | 0.34943600  | 4.51467800 | 1.48300400  |
| H | 1.71165600  | 5.61699700 | 1.46282800  |

### TS12a

SCF done: -1102.269

|   |             |             |             |
|---|-------------|-------------|-------------|
| C | 2.19791800  | -0.35583500 | -1.22210800 |
| C | 2.88758200  | 0.86892700  | -0.75378200 |
| C | 3.84020200  | 1.50668200  | -1.57922600 |
| C | 2.65502500  | 1.40641500  | 0.52302900  |
| C | 4.51440400  | 2.63624400  | -1.15386200 |
| H | 4.04171200  | 1.13008400  | -2.57754900 |
| C | 3.34563100  | 2.52965200  | 0.97015400  |
| H | 1.95014100  | 0.93102400  | 1.19056400  |
| C | 4.27390600  | 3.16052500  | 0.13015000  |
| H | 5.23287000  | 3.13867800  | -1.79227400 |
| H | 3.14924200  | 2.90144100  | 1.96794400  |
| C | 0.86285800  | 0.19515300  | -2.50343800 |
| H | -0.04595200 | -0.34085900 | -2.78611100 |

|    |             |             |             |
|----|-------------|-------------|-------------|
| H  | 0.67574500  | 1.22817700  | -2.22083100 |
| H  | 1.58330000  | 0.11200200  | -3.31536800 |
| C  | 0.87390600  | -0.70193200 | -0.84000000 |
| H  | 0.53250200  | -1.70384500 | -1.10174300 |
| O  | 0.11022300  | -0.04809100 | 0.01773700  |
| Fe | -0.45198300 | -1.19994000 | 1.79729000  |
| Br | 1.57974900  | -1.53442500 | 3.04308600  |
| Br | -2.71105100 | -1.30291900 | -1.41014400 |
| Br | -1.50211200 | -3.22294400 | 0.58967100  |
| Fe | -1.64062500 | 0.95682700  | -0.29296400 |
| Br | -2.29459800 | 0.52768000  | 2.20279300  |
| Br | -0.58489500 | 3.44215000  | -0.34770500 |
| Br | -3.09443100 | 2.45242300  | -1.78308300 |
| C  | 3.06901500  | -1.44674700 | -1.84678200 |
| C  | 4.01253300  | -1.98531900 | -0.71882400 |
| C  | 2.36396600  | -2.62963000 | -2.53583900 |
| H  | 3.69744900  | -0.95939400 | -2.60179900 |
| C  | 4.57469400  | -3.38591100 | -1.05460200 |
| H  | 3.46914300  | -2.02720100 | 0.23221500  |
| H  | 4.82769300  | -1.26951800 | -0.57776000 |
| C  | 3.40130100  | -3.48683500 | -3.30131700 |
| H  | 1.86356000  | -3.25041700 | -1.78347900 |
| H  | 1.58668700  | -2.29776500 | -3.23272600 |
| C  | 4.76149300  | -3.56689000 | -2.56520000 |
| H  | 3.89467000  | -4.16014500 | -0.67936800 |
| H  | 5.52137100  | -3.52878100 | -0.52360700 |
| H  | 3.54785700  | -3.07592800 | -4.30701300 |
| H  | 2.98584400  | -4.49088600 | -3.43710300 |
| H  | 5.43852600  | -2.78707800 | -2.93780300 |
| H  | 5.25105100  | -4.52150500 | -2.78282500 |
| O  | 4.98444400  | 4.26283400  | 0.45429100  |
| C  | 4.77355900  | 4.86421200  | 1.73036700  |

|   |            |            |            |
|---|------------|------------|------------|
| H | 5.03838200 | 4.17804700 | 2.54312800 |
| H | 5.43168500 | 5.73268700 | 1.76068400 |
| H | 3.73387400 | 5.18969700 | 1.84980800 |

### IM9a

SCF done: -1102.294078

|    |             |             |             |
|----|-------------|-------------|-------------|
| C  | 2.11395500  | -1.10500700 | 0.34407300  |
| C  | 2.36863100  | 0.14974900  | 0.94862800  |
| C  | 3.58289700  | 0.86983800  | 0.67472500  |
| C  | 1.44937100  | 0.76233400  | 1.86264000  |
| C  | 3.81985300  | 2.10699000  | 1.21161600  |
| H  | 4.29438400  | 0.47461200  | -0.03970700 |
| C  | 1.71200900  | 1.97750300  | 2.45333000  |
| H  | 0.55893100  | 0.23029900  | 2.16096500  |
| C  | 2.88355800  | 2.68458600  | 2.10767200  |
| H  | 4.70494400  | 2.67818200  | 0.95556100  |
| H  | 1.00070800  | 2.38139500  | 3.16220100  |
| C  | 0.39513400  | -2.61560800 | -0.92008900 |
| H  | -0.65059200 | -2.91490400 | -0.82446600 |
| H  | 0.51959200  | -2.12866200 | -1.88904400 |
| H  | 1.00804200  | -3.51695200 | -0.88392500 |
| C  | 0.69315400  | -1.63485500 | 0.22727400  |
| H  | 0.57748700  | -2.20080500 | 1.17892300  |
| O  | -0.28765300 | -0.61755200 | 0.24210400  |
| Fe | -2.05715800 | -0.84329900 | 1.31858700  |
| Br | -1.22410100 | -1.81850600 | 3.40231500  |
| Br | -2.60378200 | -0.12830100 | -2.51188600 |
| Br | -3.71018800 | -1.90628700 | -0.30948200 |
| Fe | -0.70425500 | 0.88331100  | -0.95108300 |
| Br | -2.35036700 | 1.70050000  | 1.03385400  |
| Br | 0.31661800  | 3.23550200  | -1.43947400 |
| Br | 1.24569500  | 0.72559200  | -2.87866000 |



|   |            |             |             |    |             |             |             |
|---|------------|-------------|-------------|----|-------------|-------------|-------------|
| C | 3.28430900 | -1.97363300 | -0.03791700 | H  | 0.85357200  | 0.09720300  | 2.19143500  |
| C | 3.26455300 | -3.34843500 | 0.73320300  | C  | 2.96623000  | 2.74291500  | 2.14654000  |
| C | 3.52136200 | -2.20394800 | -1.55877400 | H  | 4.58156400  | 3.02306900  | 0.75864800  |
| H | 4.18049700 | -1.46535400 | 0.32341700  | H  | 1.28217000  | 2.15439500  | 3.38702100  |
| C | 4.12879900 | -4.40511300 | 0.01389200  | C  | 0.51954600  | -2.46603500 | -1.24850600 |
| H | 2.24873200 | -3.72977500 | 0.85514500  | H  | -0.36297000 | -2.98303900 | -0.86611900 |
| H | 3.64995600 | -3.16687200 | 1.74236500  | H  | 0.24822100  | -2.00942800 | -2.20590200 |
| C | 4.94181600 | -2.77784800 | -1.76528400 | H  | 1.31364100  | -3.18935400 | -1.41284000 |
| H | 2.77732300 | -2.89312400 | -1.95988700 | C  | 0.88248400  | -1.33834700 | -0.30451900 |
| H | 3.40460600 | -1.26592800 | -2.10854500 | H  | 1.39915400  | -1.84082400 | 0.75064200  |
| C | 5.35768600 | -3.77373300 | -0.65201800 | O  | -0.16775500 | -0.58974700 | 0.07027700  |
| H | 3.52974200 | -4.91998100 | -0.74728000 | Fe | -1.70970400 | -1.36235100 | 1.33283200  |
| H | 4.42803100 | -5.17050900 | 0.73772100  | Br | -0.21892300 | -2.73155000 | 2.71870100  |
| H | 5.66755300 | -1.95785100 | -1.81674800 | Br | -2.93539000 | 0.01432600  | -2.10328800 |
| H | 4.96872100 | -3.27223700 | -2.74238900 | Br | -3.50491000 | -2.28983900 | -0.20791700 |
| H | 5.95144500 | -3.25836700 | 0.11417200  | Fe | -0.97517300 | 1.09163000  | -0.64547600 |
| H | 6.00863900 | -4.55060200 | -1.06509400 | Br | -2.30623800 | 1.09787500  | 1.70759300  |
| O | 3.20280600 | 3.88843600  | 2.57262300  | Br | -0.71518900 | 3.59696000  | -1.08146600 |
| C | 2.28793800 | 4.58856000  | 3.43282700  | Br | 0.74602800  | 1.44962400  | -2.71316800 |
| H | 2.14475700 | 4.04469000  | 4.37147600  | C  | 3.43875400  | -1.64405700 | -0.55789000 |
| H | 2.75888200 | 5.54996800  | 3.63180200  | C  | 3.59176000  | -3.10736200 | -0.01835300 |
| H | 1.32735400 | 4.73959700  | 2.93230300  | C  | 3.59039400  | -1.58363700 | -2.09868500 |

### TS13a

SCF done: -1102.277122

|   |            |             |             |   |            |             |             |
|---|------------|-------------|-------------|---|------------|-------------|-------------|
| C | 2.21738200 | -0.89127200 | -0.03083700 | H | 4.29260600 | -1.10201500 | -0.14688600 |
| C | 2.45972100 | 0.33247500  | 0.75607500  | C | 4.43759000 | -3.97436500 | -0.97312700 |
| C | 3.54063400 | 1.17427800  | 0.39671900  | H | 2.62311300 | -3.58623200 | 0.15018900  |
| C | 1.65863900 | 0.73066300  | 1.84508100  | H | 4.07453200 | -3.05380400 | 0.96357800  |
| C | 3.77691000 | 2.36256600  | 1.06208900  | C | 5.01888600 | -2.01850500 | -2.49983000 |
| H | 4.17056600 | 0.92960500  | -0.45078600 | H | 2.85513500 | -2.23423200 | -2.57898800 |
| C | 1.91361000 | 1.90378000  | 2.54405300  | H | 3.38617500 | -0.57198600 | -2.46444900 |
|   |            |             |             | C | 5.57267600 | -3.15932800 | -1.60703000 |
|   |            |             |             | H | 3.80175800 | -4.38716600 | -1.76686400 |
|   |            |             |             | H | 4.83453300 | -4.83304500 | -0.42199500 |

|   |            |             |             |
|---|------------|-------------|-------------|
| H | 5.69340200 | -1.15582600 | -2.45414400 |
| H | 4.99916600 | -2.33531500 | -3.54812800 |
| H | 6.19659100 | -2.74146500 | -0.80627700 |
| H | 6.22909300 | -3.81047300 | -2.19278800 |
| O | 3.28292600 | 3.91275600  | 2.73733700  |
| C | 2.46646700 | 4.38628400  | 3.80824000  |
| H | 2.49571900 | 3.70175000  | 4.66375000  |
| H | 2.88995300 | 5.34759900  | 4.09897900  |
| H | 1.42939400 | 4.52604300  | 3.48372900  |

### IM10a

SCF done: -1102.308873

|    |             |             |             |
|----|-------------|-------------|-------------|
| C  | -2.11942500 | 1.72150200  | 0.38234300  |
| C  | -1.95090700 | 0.64856000  | 1.44209900  |
| C  | -2.24564200 | -0.70762900 | 1.19430900  |
| C  | -1.47130400 | 0.99120600  | 2.70878200  |
| C  | -2.05521600 | -1.67624800 | 2.17872300  |
| H  | -2.68358200 | -1.01208600 | 0.24877300  |
| C  | -1.28262800 | 0.03314300  | 3.70662100  |
| H  | -1.22531300 | 2.02650300  | 2.92934000  |
| C  | -1.56461200 | -1.31302700 | 3.44362400  |
| H  | -2.28597200 | -2.71824300 | 1.98852200  |
| H  | -0.90412700 | 0.34508800  | 4.67227000  |
| C  | -0.71239800 | 2.97495500  | -1.42732400 |
| H  | -0.14849100 | 3.70290200  | -0.82632100 |
| H  | -0.10642700 | 2.70973600  | -2.29558600 |
| H  | -1.64782200 | 3.44558800  | -1.72929800 |
| C  | -0.93236100 | 1.77257000  | -0.56237900 |
| H  | -2.04277600 | 2.69282500  | 0.89530100  |
| O  | -0.05447300 | 0.88007900  | -0.56637100 |
| Fe | 2.20018600  | 1.52820300  | 0.34668100  |
| Br | 1.66401000  | 3.59337000  | 1.46842200  |

|    |             |             |             |
|----|-------------|-------------|-------------|
| Br | 1.96420200  | -1.17844800 | -2.35562000 |
| Br | 3.63714400  | 1.25862300  | -1.68140000 |
| Fe | 0.17989600  | -1.23833100 | -0.30191000 |
| Br | 1.93217700  | -0.66382800 | 1.59052200  |
| Br | 0.13119800  | -3.82029700 | 0.01419300  |
| Br | -1.52384600 | -2.33678600 | -2.07546300 |
| C  | -3.52982100 | 1.72903000  | -0.33631700 |
| C  | -4.16475700 | 3.14603000  | -0.35666200 |
| C  | -3.59495600 | 1.09763400  | -1.74053600 |
| H  | -4.15059900 | 1.10527600  | 0.31584900  |
| C  | -5.30677400 | 3.26902100  | -1.39226200 |
| H  | -3.40294900 | 3.90644300  | -0.56754300 |
| H  | -4.53984500 | 3.37086100  | 0.64953300  |
| C  | -5.06826100 | 0.85880100  | -2.15458000 |
| H  | -3.11365300 | 1.76302200  | -2.46838300 |
| H  | -3.05047600 | 0.14897600  | -1.78550600 |
| C  | -6.02873900 | 1.92936500  | -1.58228800 |
| H  | -4.89953100 | 3.59364800  | -2.35840600 |
| H  | -6.00710700 | 4.05063400  | -1.07960300 |
| H  | -5.38578400 | -0.13530700 | -1.82015200 |
| H  | -5.12780300 | 0.84751300  | -3.24836300 |
| H  | -6.42792100 | 1.59908100  | -0.61459900 |
| H  | -6.89452000 | 2.04888200  | -2.24178300 |
| O  | -1.40939800 | -2.32626800 | 4.33012500  |
| C  | -0.84065600 | -2.03441900 | 5.60181300  |
| H  | -1.47604900 | -1.35128500 | 6.17925300  |
| H  | -0.77279500 | -2.98930300 | 6.12364200  |
| H  | 0.16212800  | -1.60304900 | 5.50027200  |

### TS14a

SCF done: -1102.283915

|   |            |            |            |
|---|------------|------------|------------|
| C | 1.38796500 | 0.55547800 | 0.81716100 |
|---|------------|------------|------------|

|    |             |             |             |
|----|-------------|-------------|-------------|
| C  | 1.14549400  | 0.36661000  | 2.28361900  |
| H  | 0.54805500  | 1.22402000  | 2.61448800  |
| H  | 0.55984900  | -0.52605100 | 2.49774000  |
| H  | 2.07289200  | 0.36512900  | 2.86083600  |
| C  | 0.73222100  | -0.31838300 | -0.15772100 |
| O  | -0.33684300 | -1.11341900 | 0.20724900  |
| Fe | -2.18317900 | -0.47142800 | 0.77939800  |
| Br | -2.05422100 | 1.92194400  | 1.06845300  |
| Br | -4.10342800 | -0.63387500 | -0.86912100 |
| Br | -2.60674500 | -2.17695200 | 2.61871800  |
| H  | 0.63845100  | 0.12141100  | -1.15523600 |
| C  | 2.13937600  | -1.02025000 | -0.04853600 |
| C  | 3.10568100  | -0.83475500 | -1.07698900 |
| C  | 2.37755400  | -2.03008700 | 0.91319400  |
| C  | 4.23578400  | -1.61319500 | -1.13344800 |
| H  | 2.93166200  | -0.10377200 | -1.85927900 |
| C  | 3.51465200  | -2.81735000 | 0.86617300  |
| H  | 1.64669700  | -2.22669100 | 1.68771800  |
| C  | 4.45371300  | -2.62110100 | -0.16353400 |
| H  | 4.95824600  | -1.50570800 | -1.93464900 |
| H  | 3.64978800  | -3.59561600 | 1.60610800  |
| O  | 5.57362800  | -3.33370000 | -0.31807600 |
| C  | 5.83013100  | -4.44353600 | 0.55161500  |
| H  | 6.76356900  | -4.87984500 | 0.19840200  |
| H  | 5.94904500  | -4.11094500 | 1.58819400  |
| H  | 5.02676800  | -5.18365100 | 0.48339400  |
| C  | 2.17032000  | 1.76754300  | 0.35959500  |
| C  | 1.34152400  | 3.08606900  | 0.55117000  |
| C  | 3.54702000  | 1.91897400  | 1.04110600  |
| H  | 2.34043500  | 1.66700800  | -0.71639200 |
| C  | 2.25978300  | 4.33112100  | 0.58263300  |
| H  | 0.75062300  | 3.04765900  | 1.46807600  |

|    |             |             |             |
|----|-------------|-------------|-------------|
| H  | 0.61763400  | 3.15792000  | -0.26492000 |
| C  | 4.39284000  | 2.98840800  | 0.31137200  |
| H  | 3.39752200  | 2.20983000  | 2.08713100  |
| H  | 4.07837800  | 0.96172500  | 1.05286200  |
| C  | 3.52522600  | 4.13555900  | -0.26044500 |
| H  | 2.55094900  | 4.55097800  | 1.61736400  |
| H  | 1.68935300  | 5.19858000  | 0.23526900  |
| H  | 4.96358200  | 2.51773600  | -0.49756600 |
| H  | 5.13094600  | 3.38986200  | 1.01442900  |
| H  | 3.23612900  | 3.91105100  | -1.29540300 |
| H  | 4.10684200  | 5.06189200  | -0.30398800 |
| Fe | -0.45655100 | -3.01312000 | -0.54281900 |
| Br | -2.82150200 | -3.25733900 | -1.59210500 |
| Br | -0.56260100 | -4.26431000 | 1.75901600  |
| Br | 1.06541500  | -3.98391000 | -2.16472200 |

### IM11a

SCF done: -1102.282997

|   |            |             |             |
|---|------------|-------------|-------------|
| C | 1.79963100 | -1.50879700 | -0.80787900 |
| C | 1.96936100 | 0.33893400  | 0.98039000  |
| C | 2.50532200 | 1.43322500  | 0.28998300  |
| C | 2.09873700 | 0.28991600  | 2.37953200  |
| C | 3.15816100 | 2.46183800  | 0.97002800  |
| H | 2.38831900 | 1.50764500  | -0.78663600 |
| C | 2.75219500 | 1.30365300  | 3.06295100  |
| H | 1.67870700 | -0.54484300 | 2.93291100  |
| C | 3.28523600 | 2.40074400  | 2.36460700  |
| H | 3.54817900 | 3.30133300  | 0.40777700  |
| H | 2.85528600 | 1.27691200  | 4.14234000  |
| C | 0.92000800 | -2.11294800 | -1.82876500 |
| H | 0.10160600 | -2.65271700 | -1.33314500 |
| H | 0.41198800 | -1.30707200 | -2.37632600 |

|    |             |             |             |
|----|-------------|-------------|-------------|
| H  | 1.44458900  | -2.77606600 | -2.51383400 |
| C  | 1.18164400  | -0.72773200 | 0.24408800  |
| H  | 1.22743900  | -1.67966900 | 0.92180300  |
| O  | -0.17488700 | -0.47052300 | 0.06895500  |
| Fe | -1.58631000 | -1.31581600 | 1.38819500  |
| Br | -0.07511200 | -3.03647700 | 2.38953000  |
| Br | -3.15104600 | 0.10737000  | -1.84780800 |
| Br | -3.36081500 | -2.37114700 | -0.13467100 |
| Fe | -1.12314600 | 1.14784100  | -0.51446900 |
| Br | -2.31504700 | 1.00714400  | 2.00468800  |
| Br | -0.93917300 | 3.68999100  | -0.75274600 |
| Br | 0.28523500  | 1.76370000  | -2.79593200 |
| C  | 3.24531500  | -1.83972900 | -0.74392500 |
| C  | 3.50669700  | -3.39242900 | -0.70241300 |
| C  | 3.98594200  | -1.17170900 | -1.95409800 |
| H  | 3.65714000  | -1.38504400 | 0.16114200  |
| C  | 4.09788500  | -3.94587400 | -2.00448900 |
| H  | 2.59228600  | -3.93115400 | -0.43331500 |
| H  | 4.20829600  | -3.57109800 | 0.11987000  |
| C  | 5.40993100  | -1.73724200 | -2.04664400 |
| H  | 3.44448900  | -1.35515800 | -2.88877600 |
| H  | 4.00586800  | -0.08924600 | -1.80278400 |
| C  | 5.42200500  | -3.25050200 | -2.38158300 |
| H  | 3.37300100  | -3.83051700 | -2.81963700 |
| H  | 4.25485000  | -5.02434700 | -1.89821500 |
| H  | 5.91556200  | -1.55625100 | -1.09017500 |
| H  | 5.97084800  | -1.17324700 | -2.79876500 |
| H  | 6.25366400  | -3.72999500 | -1.85364200 |
| H  | 5.61109900  | -3.39876900 | -3.45007100 |
| O  | 3.89962300  | 3.34007100  | 3.12497100  |
| C  | 4.41301200  | 4.50424400  | 2.48743900  |
| H  | 3.62004000  | 5.06468100  | 1.97798800  |

|   |            |            |            |
|---|------------|------------|------------|
| H | 4.83516700 | 5.11827300 | 3.28347600 |
| H | 5.20162000 | 4.25340700 | 1.76723300 |

### TS15a

SCF done: -1102.28292

|    |             |             |             |
|----|-------------|-------------|-------------|
| C  | 1.89030700  | -1.44812000 | -0.80528300 |
| C  | 1.92133300  | 0.47671700  | 0.91375300  |
| C  | 2.44140000  | 1.59852000  | 0.25640300  |
| C  | 1.97792500  | 0.42289200  | 2.31803100  |
| C  | 3.00959900  | 2.65104300  | 0.97463600  |
| H  | 2.37576700  | 1.67282300  | -0.82438100 |
| C  | 2.55088600  | 1.45907300  | 3.03812000  |
| H  | 1.57183300  | -0.43519300 | 2.84470900  |
| C  | 3.06699200  | 2.58512900  | 2.37350300  |
| H  | 3.38943300  | 3.51155700  | 0.43785500  |
| H  | 2.60148300  | 1.42836300  | 4.12107500  |
| C  | 1.05166900  | -2.25653100 | -1.73644800 |
| H  | 0.35511800  | -2.88374700 | -1.16691800 |
| H  | 0.42427500  | -1.58440800 | -2.33240200 |
| H  | 1.65275100  | -2.89408800 | -2.38335800 |
| C  | 1.22176100  | -0.59798800 | 0.12284800  |
| H  | 1.40172700  | -1.66682200 | 0.71142700  |
| O  | -0.13791000 | -0.48945700 | -0.00284800 |
| Fe | -1.45559100 | -1.42446000 | 1.37764300  |
| Br | 0.22987700  | -3.08090800 | 2.19755100  |
| Br | -3.23936000 | -0.05123100 | -1.76664900 |
| Br | -3.28258000 | -2.52580200 | -0.03683000 |
| Fe | -1.21388100 | 1.08650500  | -0.53218000 |
| Br | -2.25863100 | 0.85005400  | 2.05374000  |
| Br | -1.20406100 | 3.63027200  | -0.75969100 |
| Br | 0.12522000  | 1.77369100  | -2.81039600 |
| C  | 3.37738700  | -1.62086500 | -0.76856200 |

|   |            |             |             |
|---|------------|-------------|-------------|
| C | 3.82426400 | -3.11787600 | -0.61483000 |
| C | 3.98458500 | -0.97020700 | -2.05161200 |
| H | 3.76044900 | -1.04777400 | 0.08007600  |
| C | 4.51157900 | -3.67591300 | -1.86856500 |
| H | 2.97444300 | -3.74766600 | -0.33178700 |
| H | 4.52202800 | -3.16604400 | 0.22855000  |
| C | 5.47994100 | -1.30884700 | -2.13741700 |
| H | 3.46596900 | -1.32789400 | -2.94828100 |
| H | 3.83704400 | 0.11284400  | -2.01218300 |
| C | 5.73451800 | -2.83365100 | -2.27978100 |
| H | 3.79416800 | -3.71519100 | -2.69759500 |
| H | 4.81294700 | -4.71274000 | -1.68607700 |
| H | 5.97130200 | -0.92596200 | -1.23456800 |
| H | 5.92298500 | -0.76501900 | -2.97780100 |
| H | 6.59606800 | -3.11593300 | -1.66427900 |
| H | 6.00437700 | -3.07742500 | -3.31285100 |
| O | 3.59542700 | 3.54610400  | 3.16971000  |
| C | 4.07696300 | 4.74244600  | 2.56747700  |
| H | 3.28228400 | 5.26227000  | 2.01913600  |
| H | 4.42063400 | 5.37184400  | 3.38882100  |
| H | 4.91614800 | 4.54228500  | 1.88986500  |

### IM12a

SCF done: -1102.320666

|   |            |             |             |
|---|------------|-------------|-------------|
| C | 1.74892800 | -0.78172100 | -1.35483000 |
| C | 1.73944400 | 1.40489400  | 0.11990600  |
| C | 2.87741100 | 1.97825800  | -0.49016500 |
| C | 1.17871700 | 2.06996800  | 1.24468600  |
| C | 3.42469400 | 3.16294100  | -0.02777100 |
| H | 3.32535300 | 1.50361900  | -1.35234000 |
| C | 1.72558700 | 3.23764900  | 1.72452200  |
| H | 0.32205100 | 1.63618100  | 1.74609800  |

|    |             |             |             |
|----|-------------|-------------|-------------|
| C  | 2.85228600  | 3.80324600  | 1.08929700  |
| H  | 4.28575000  | 3.58501700  | -0.53049500 |
| H  | 1.31078200  | 3.74343700  | 2.58905900  |
| C  | 1.44411500  | -0.27267500 | -2.79120100 |
| H  | 0.36982500  | -0.12646800 | -2.92514500 |
| H  | 1.94547000  | 0.66882600  | -3.02506800 |
| H  | 1.77118300  | -1.02543700 | -3.51275700 |
| C  | 1.13538000  | 0.18293000  | -0.35360800 |
| H  | 1.13245000  | -1.67911700 | -1.24106700 |
| O  | -0.03086400 | -0.12511700 | 0.09512600  |
| Fe | -0.57830200 | -1.92751400 | 1.24231700  |
| Br | 1.27084600  | -2.38634900 | 2.69725600  |
| Br | -2.80358900 | -1.04597200 | -1.93628900 |
| Br | -1.46230600 | -3.43214600 | -0.65481200 |
| Fe | -1.97583900 | 0.72342500  | -0.21981700 |
| Br | -2.62992900 | -0.58355000 | 1.97017100  |
| Br | -2.62434100 | 3.07261800  | 0.64004500  |
| Br | -1.41112300 | 2.54668200  | -2.10407100 |
| C  | 3.23937100  | -1.21031800 | -1.08541400 |
| C  | 3.29801200  | -2.74430700 | -0.84314700 |
| C  | 4.27599800  | -0.85871300 | -2.17193600 |
| H  | 3.56148700  | -0.71969300 | -0.15923600 |
| C  | 4.72793900  | -3.32456100 | -0.97393800 |
| H  | 2.64109500  | -3.24513900 | -1.56637400 |
| H  | 2.88792600  | -2.95762200 | 0.14961200  |
| C  | 5.71148900  | -1.08442200 | -1.63658900 |
| H  | 4.10255300  | -1.49720800 | -3.04702100 |
| H  | 4.18312700  | 0.16914500  | -2.53889900 |
| C  | 5.79196500  | -2.27014700 | -0.64601500 |
| H  | 4.89210000  | -3.68627000 | -1.99713900 |
| H  | 4.83360500  | -4.19766200 | -0.32177000 |
| H  | 6.06930400  | -0.17162900 | -1.14445000 |

|   |            |             |             |   |            |            |            |
|---|------------|-------------|-------------|---|------------|------------|------------|
| H | 6.38127300 | -1.25747800 | -2.48684100 | H | 4.24518300 | 5.88408500 | 0.01100400 |
| H | 5.63810100 | -1.91400600 | 0.38029200  | H | 4.60966200 | 6.48443900 | 1.65151800 |
| H | 6.79423600 | -2.71134800 | -0.66702400 | H | 5.32849500 | 4.94976900 | 1.09204200 |
| O | 3.30689900 | 4.94533200  | 1.62592300  |   |            |            |            |
| C | 4.44264700 | 5.59267800  | 1.04822000  |   |            |            |            |

**Cartesian Coordinates for the Stationary Points Given in Fig. 5.**

|                       |             |             |             |    |             |             |             |
|-----------------------|-------------|-------------|-------------|----|-------------|-------------|-------------|
| <b>TS16a</b>          |             |             |             | Br | 0.67154700  | -2.35056000 | -1.17988100 |
| SCF done: -936.293406 |             |             |             | O  | -6.29260400 | -1.60331700 | 1.16826000  |
| C                     | -1.37351800 | 0.08135200  | -1.12440700 | C  | -7.55421800 | -1.17630500 | 0.62948800  |
| C                     | -2.67456600 | -0.37676500 | -0.55372500 | H  | -8.31888200 | -1.61678200 | 1.28351400  |
| C                     | -2.72318500 | -1.21271200 | 0.59063700  | H  | -7.64648400 | -0.07514500 | 0.64566700  |
| C                     | -3.89353700 | 0.04896600  | -1.12496700 | H  | -7.69553300 | -1.54424500 | -0.40273800 |
| C                     | -3.94294900 | -1.61140000 | 1.13192900  | C  | -0.81705200 | 2.20398700  | 0.20688300  |
| H                     | -1.79664900 | -1.58194700 | 1.04227700  | C  | 0.08534900  | 2.76781800  | 1.32831000  |
| C                     | -5.12658500 | -0.33492000 | -0.58444900 | C  | -0.82305300 | 3.15874800  | -1.01954000 |
| H                     | -3.87724600 | 0.71944900  | -1.99097800 | H  | -1.84804600 | 2.12157300  | 0.60377800  |
| C                     | -5.15746700 | -1.17254200 | 0.55254000  | C  | -0.45883200 | 4.11726300  | 1.87477300  |
| H                     | -3.98632300 | -2.26563200 | 2.00697800  | H  | 1.09140900  | 2.92579500  | 0.90107400  |
| H                     | -6.04926600 | 0.03253400  | -1.03882800 | H  | 0.20294700  | 2.03120800  | 2.14367700  |
| C                     | -1.20627200 | 0.26685900  | -2.48447200 | C  | -0.69729400 | 4.65625700  | -0.58923900 |
| H                     | -0.29199500 | 0.73421600  | -2.86175800 | H  | 0.02929000  | 2.89660500  | -1.67066900 |
| H                     | -0.63759000 | -1.00756600 | -1.44307900 | H  | -1.74822600 | 3.01403700  | -1.59748200 |
| H                     | -1.90744900 | -0.17000500 | -3.20258200 | C  | -1.27964100 | 4.88769300  | 0.81131300  |
| C                     | -0.38459000 | 0.74961400  | -0.14830600 | H  | 0.39749600  | 4.73372200  | 2.20240300  |
| H                     | -0.40720400 | 0.16931900  | 0.80124800  | H  | -1.08425200 | 3.93858300  | 2.76801400  |
| O                     | 0.91629400  | 0.74256200  | -0.71470900 | H  | -1.17176200 | 5.31380700  | -1.33800700 |
| Fe                    | 2.06300400  | -0.44831100 | -0.04492900 | H  | 0.37255300  | 4.93521300  | -0.56568500 |
| Br                    | 4.06541500  | 0.78296800  | -0.48414000 | H  | -2.32703200 | 4.52928100  | 0.82636000  |
| Br                    | 2.90743600  | -1.84902100 | 1.67548000  | H  | -1.31684700 | 5.96604300  | 1.04486200  |

**IM13a**

SCF done: -936.317456

|    |             |             |             |
|----|-------------|-------------|-------------|
| C  | 1.02939500  | -0.52590300 | 0.39819500  |
| C  | 2.51633100  | -0.82908900 | 0.22411200  |
| C  | 2.91671400  | -1.75450000 | -0.76844100 |
| C  | 3.52299800  | -0.21236300 | 0.99366500  |
| C  | 4.26382100  | -2.04359800 | -0.98931900 |
| H  | 2.15480500  | -2.25535700 | -1.37642200 |
| C  | 4.88311300  | -0.49882100 | 0.79284000  |
| H  | 3.25734700  | 0.50806800  | 1.77511800  |
| C  | 5.26116600  | -1.41731500 | -0.20795600 |
| H  | 4.57082600  | -2.75903200 | -1.75773200 |
| H  | 5.63214600  | -0.00395000 | 1.41520800  |
| C  | 0.67883200  | -0.34927200 | 1.87629900  |
| H  | 0.84738100  | 0.65078100  | 2.29019300  |
| H  | 0.48451400  | -1.42282600 | 0.04375200  |
| H  | 1.14139500  | -1.12164800 | 2.50313000  |
| C  | 0.55964200  | 0.62040400  | -0.57538700 |
| H  | 0.70247800  | 0.19966400  | -1.59440100 |
| O  | -0.81946300 | 0.89508200  | -0.41069200 |
| Fe | -2.24153400 | -0.11166600 | -0.22502100 |
| Br | -4.51204500 | -0.48489800 | 0.35282400  |
| Br | -1.90018700 | -1.60871500 | -2.05970700 |
| Br | -1.33675500 | -0.66865900 | 2.25334100  |
| O  | 6.54994800  | -1.77099200 | -0.49730200 |
| C  | 7.59473800  | -1.16426100 | 0.27467000  |
| H  | 8.53380300  | -1.58023200 | -0.11603700 |
| H  | 7.60218600  | -0.06518800 | 0.15332100  |
| H  | 7.50176500  | -1.41326500 | 1.34800200  |
| C  | 1.33242600  | 1.97447900  | -0.54775000 |
| C  | 0.95102400  | 2.84162900  | -1.78988800 |

|   |             |            |             |
|---|-------------|------------|-------------|
| C | 1.16970400  | 2.78966400 | 0.76533000  |
| H | 2.39459600  | 1.68170700 | -0.64914900 |
| C | -0.09555400 | 3.91807100 | -1.45082000 |
| H | 0.58759200  | 2.19232800 | -2.60646400 |
| H | 1.86417300  | 3.33382900 | -2.17451000 |
| C | 1.49172300  | 4.27896700 | 0.53274000  |
| H | 0.13251600  | 2.69767600 | 1.13890500  |
| H | 1.83383900  | 2.38680600 | 1.55168300  |
| C | 0.46150000  | 4.93598400 | -0.42203600 |
| H | -0.99149800 | 3.41748600 | -1.04193200 |
| H | -0.42214800 | 4.43756700 | -2.36875800 |
| H | 2.50914200  | 4.35659000 | 0.10436100  |
| H | 1.52314600  | 4.81764200 | 1.49607500  |
| H | 0.93901700  | 5.78423600 | -0.94544500 |
| H | -0.37388000 | 5.36277100 | 0.16205800  |

**IM14a**

SCF done: -1012.755498

|   |             |             |             |
|---|-------------|-------------|-------------|
| C | -1.28981400 | -0.10199200 | -1.06318200 |
| C | -2.53236500 | -0.50088100 | -0.46399000 |
| C | -2.76328400 | -0.40799300 | 0.95162900  |
| C | -3.59958000 | -1.00234400 | -1.27412700 |
| C | -3.98207400 | -0.77001100 | 1.49735800  |
| H | -1.95849500 | -0.10068500 | 1.63166100  |
| C | -4.82988600 | -1.35568700 | -0.73492900 |
| H | -3.46306900 | -1.09276300 | -2.35466200 |
| C | -5.03327800 | -1.24103300 | 0.66524900  |
| H | -4.15551900 | -0.72134200 | 2.57582000  |
| H | -5.62530000 | -1.71698600 | -1.38994600 |
| C | -1.05179900 | -0.28787700 | -2.53545700 |
| H | -1.68937500 | 0.42366300  | -3.09741900 |
| H | -0.00296500 | -0.07417900 | -2.77912600 |

|    |             |             |             |
|----|-------------|-------------|-------------|
| H  | -1.30568600 | -1.30119800 | -2.87728600 |
| C  | -0.36268200 | 0.85133800  | -0.32436800 |
| H  | -0.39838600 | 0.63140700  | 0.76210700  |
| O  | 0.96787100  | 0.77456600  | -0.79316900 |
| Fe | 2.14551700  | -0.45608500 | -0.23828800 |
| Br | 0.47741600  | -2.24760100 | -0.38879900 |
| Br | 4.08144300  | -1.66760600 | -0.74902500 |
| Br | 2.85019700  | 0.63005400  | 1.81284400  |
| O  | -0.36153900 | 0.32696400  | 3.02262400  |
| H  | -0.25057800 | 1.27317000  | 3.23269700  |
| H  | 0.54969500  | 0.06761200  | 2.75682600  |
| O  | -6.17777300 | -1.56047100 | 1.30079800  |
| C  | -7.28372100 | -2.07521100 | 0.52855000  |
| H  | -8.08412800 | -2.26007200 | 1.25647100  |
| H  | -7.62181900 | -1.33563200 | -0.21725500 |
| H  | -7.00912800 | -3.01942400 | 0.02863600  |
| C  | -0.85534500 | 2.35315600  | -0.44565300 |
| C  | -0.14318200 | 3.17980500  | 0.66920100  |
| C  | -0.62392300 | 3.01577500  | -1.81653000 |
| H  | -1.94401700 | 2.33354200  | -0.24251700 |
| C  | -0.03245000 | 4.68458300  | 0.31787100  |
| H  | 0.86500000  | 2.76139600  | 0.83715400  |
| H  | -0.70822800 | 3.05389300  | 1.61172100  |
| C  | -1.30081800 | 4.41352900  | -1.86531400 |
| H  | 0.46439200  | 3.10729400  | -1.97887600 |
| H  | -1.00733900 | 2.40041300  | -2.64711400 |
| C  | -1.24895300 | 5.14997200  | -0.49872100 |
| H  | 0.88809200  | 4.86457800  | -0.26815500 |
| H  | 0.07344900  | 5.27475700  | 1.24517300  |
| H  | -2.35239700 | 4.30720600  | -2.18951700 |
| H  | -0.79820400 | 5.01913300  | -2.64079000 |
| H  | -2.16915500 | 4.94058200  | 0.08027300  |

|   |             |            |             |
|---|-------------|------------|-------------|
| H | -1.22679500 | 6.24293500 | -0.65363000 |
|---|-------------|------------|-------------|

### TS17a

SCF done: -1012.731293

|    |             |             |             |
|----|-------------|-------------|-------------|
| C  | -0.94179100 | -0.42586600 | -0.77359400 |
| C  | -2.31269600 | -0.78383400 | -0.33975800 |
| C  | -2.72984300 | -0.64791700 | 1.01493400  |
| C  | -3.26445600 | -1.28222600 | -1.26236200 |
| C  | -4.02258200 | -0.96486500 | 1.41310900  |
| H  | -2.01421600 | -0.33096400 | 1.77795900  |
| C  | -4.57336400 | -1.59829300 | -0.87947900 |
| H  | -2.99128400 | -1.41500600 | -2.31194000 |
| C  | -4.96391200 | -1.44085800 | 0.46730200  |
| H  | -4.33216400 | -0.87216200 | 2.45791800  |
| H  | -5.27564200 | -1.96680700 | -1.63045700 |
| C  | -0.58620700 | -0.67873500 | -2.23708400 |
| H  | -1.20850200 | -0.02559900 | -2.87674900 |
| H  | 0.46694400  | -0.43482800 | -2.43262500 |
| H  | -0.76435900 | -1.72424600 | -2.52697200 |
| C  | -0.32305400 | 0.84963100  | -0.19845800 |
| H  | -0.20517400 | 0.67982700  | 1.25047700  |
| O  | 0.97741800  | 1.02761000  | -0.44459800 |
| Fe | 2.41725400  | -0.18860700 | -0.22429200 |
| Br | 0.48385000  | -2.00276400 | 0.19890900  |
| Br | 4.10940200  | -0.97186100 | -1.69249800 |
| Br | 3.09336800  | 0.15563500  | 2.19823000  |
| O  | 0.07543200  | 0.63351600  | 2.42102400  |
| H  | 0.02512300  | 1.56712100  | 2.72660200  |
| H  | 1.09857600  | 0.39629500  | 2.43903600  |
| O  | -6.20003700 | -1.72161100 | 0.95937900  |
| C  | -7.18400500 | -2.24500000 | 0.05116300  |
| H  | -6.85431100 | -3.20456900 | -0.38545300 |



|   |             |             |             |
|---|-------------|-------------|-------------|
| H | -8.08668100 | -2.40703400 | 0.65563800  |
| H | -7.40564900 | -1.52589200 | -0.75772500 |
| C | -1.18178000 | 2.14659500  | -0.21818000 |
| C | -0.56649100 | 3.24767400  | 0.70454500  |
| C | -1.35686800 | 2.70939600  | -1.65601700 |
| H | -2.18450100 | 1.87124200  | 0.15553400  |
| C | -0.83447200 | 4.68638000  | 0.20069300  |
| H | 0.52315000  | 3.08561500  | 0.78402600  |
| H | -1.00514300 | 3.14925800  | 1.71860800  |
| C | -2.35376000 | 3.89653000  | -1.67427800 |
| H | -0.36354700 | 3.02009000  | -2.02686200 |
| H | -1.71662900 | 1.92560300  | -2.34247800 |
| C | -2.23964400 | 4.79381600  | -0.41248900 |
| H | -0.07932100 | 4.96460500  | -0.55761200 |
| H | -0.70890800 | 5.39770900  | 1.03550300  |
| H | -3.38532800 | 3.51199600  | -1.76722600 |
| H | -2.16157600 | 4.49374500  | -2.58390900 |
| H | -2.98393700 | 4.48036200  | 0.34461000  |
| H | -2.48016200 | 5.84141200  | -0.66347100 |

### IM15a

SCF done: -1012.791475

|   |             |             |             |
|---|-------------|-------------|-------------|
| C | -1.89625100 | -0.59015600 | -0.19486200 |
| C | -3.34604900 | -0.62738900 | -0.23390100 |
| C | -4.16098200 | 0.06239300  | 0.72075900  |
| C | -4.02559700 | -1.41695600 | -1.20947200 |
| C | -5.54486600 | -0.02232100 | 0.69019800  |
| H | -3.68567400 | 0.61314000  | 1.53667600  |
| C | -5.41614800 | -1.48662800 | -1.26925900 |
| H | -3.44521400 | -1.94669300 | -1.96993100 |
| C | -6.19259100 | -0.78888600 | -0.31319700 |
| H | -6.16033000 | 0.47877000  | 1.44239300  |

|    |             |             |             |
|----|-------------|-------------|-------------|
| H  | -5.89154800 | -2.07634700 | -2.05590100 |
| C  | -1.10160800 | -1.79990600 | -0.60571200 |
| H  | -0.34897400 | -1.56530400 | -1.38167200 |
| H  | -0.53757300 | -2.18563100 | 0.27242400  |
| H  | -1.73344700 | -2.62737300 | -0.95558200 |
| C  | -1.14038200 | 0.55267400  | 0.24272900  |
| H  | 4.23178100  | 0.22848100  | -1.39297200 |
| O  | 0.13042700  | 0.43183000  | 0.45480100  |
| Fe | 1.64181500  | -0.72971500 | 0.47784000  |
| Br | 1.97258900  | -2.63223300 | 1.94917300  |
| Br | 2.63976200  | -1.00020700 | -1.81574000 |
| Br | 5.32091200  | 1.17876100  | -0.84812300 |
| O  | 3.02665600  | 0.54555400  | 1.49996800  |
| H  | 3.40437300  | -0.01429700 | 2.20885900  |
| H  | 3.79627700  | 0.81705000  | 0.93592700  |
| O  | -7.54656700 | -0.79454600 | -0.26164500 |
| C  | -8.26476400 | -1.56955000 | -1.24080600 |
| H  | -9.32750700 | -1.42518500 | -1.00589300 |
| H  | -8.05841400 | -1.20764100 | -2.26321500 |
| H  | -8.00977900 | -2.64091200 | -1.16409200 |
| C  | -1.67785200 | 1.96881300  | 0.35436900  |
| C  | -1.49080400 | 2.54880100  | 1.79442900  |
| C  | -0.95484600 | 2.88427300  | -0.67552300 |
| H  | -2.74803000 | 1.96433800  | 0.08966800  |
| C  | -1.35547700 | 4.09264300  | 1.79592200  |
| H  | -0.59438100 | 2.09472700  | 2.25009200  |
| H  | -2.35382600 | 2.24718300  | 2.41750100  |
| C  | -1.62479700 | 4.28082000  | -0.72421400 |
| H  | 0.10472200  | 2.96420000  | -0.37667000 |
| H  | -0.96318500 | 2.42012600  | -1.67702900 |
| C  | -2.17708600 | 4.72185400  | 0.65802700  |
| H  | -0.29323600 | 4.37588400  | 1.67401900  |

|   |             |            |             |   |             |            |            |
|---|-------------|------------|-------------|---|-------------|------------|------------|
| H | -1.66918100 | 4.48952900 | 2.77729700  | H | -3.23311500 | 4.40638700 | 0.76218200 |
| H | -2.44188200 | 4.27932900 | -1.46802100 | H | -2.17754800 | 5.82294000 | 0.73543300 |
| H | -0.87927500 | 5.01306800 | -1.08306900 |   |             |            |            |

**Cartesian Coordinates for the Stationary Points Given in Fig. 7.**

**1B**

SCF done: -769.9609956

|   |             |             |             |
|---|-------------|-------------|-------------|
| C | 0.89450600  | 1.00393800  | 0.25168600  |
| C | -0.51809100 | 0.40037300  | 0.17096000  |
| C | -1.58066500 | 1.13248500  | -0.36799800 |
| C | -0.80975100 | -0.85908500 | 0.72286200  |
| C | -2.88820300 | 0.63615200  | -0.38175000 |
| H | -1.40412800 | 2.12251400  | -0.78125900 |
| C | -2.10242600 | -1.36434100 | 0.72499900  |
| H | -0.01077000 | -1.45397800 | 1.15416300  |
| C | -3.15439900 | -0.62204200 | 0.16680300  |
| H | -3.67809100 | 1.23748900  | -0.81594300 |
| H | -2.32494800 | -2.33660800 | 1.15273800  |
| C | 1.99454800  | -0.05933500 | 0.07253900  |
| C | 3.13319600  | -0.09987300 | 0.88945400  |
| C | 1.91034400  | -0.98107100 | -0.98681000 |
| C | 4.14457800  | -1.03685300 | 0.66621800  |
| H | 3.23891900  | 0.59668500  | 1.71312900  |
| C | 2.92299600  | -1.91118400 | -1.21574800 |
| H | 1.03180000  | -0.98530600 | -1.62499900 |
| C | 4.04657500  | -1.94430800 | -0.38780500 |
| H | 5.01199700  | -1.05229400 | 1.32012600  |
| H | 2.83047100  | -2.61344700 | -2.03944900 |
| H | 4.83496000  | -2.67087700 | -0.56163300 |
| C | 1.02547900  | 1.81661900  | 1.55346600  |

|   |             |             |             |
|---|-------------|-------------|-------------|
| H | 1.96356000  | 2.37552000  | 1.58615500  |
| H | 0.21235200  | 2.54303000  | 1.61327100  |
| H | 0.96245800  | 1.15911100  | 2.42480200  |
| C | 1.09693200  | 1.94832100  | -0.95116200 |
| H | 0.98217000  | 1.45400300  | -1.94018900 |
| O | 1.37500100  | 3.12268600  | -0.86902800 |
| O | -4.38476600 | -1.21017200 | 0.20967600  |
| C | -5.48486300 | -0.50434300 | -0.34171400 |
| H | -6.35536900 | -1.14780300 | -0.20515400 |
| H | -5.65637200 | 0.44832700  | 0.17596800  |
| H | -5.34541100 | -0.30918600 | -1.41291900 |

**1b**

SCF done: -934.3308346

|   |             |             |             |
|---|-------------|-------------|-------------|
| C | -1.79194400 | 0.89417200  | -0.86858200 |
| C | -3.04772900 | 0.03946700  | -0.61495500 |
| C | -2.93034700 | -1.33360600 | -0.35850600 |
| C | -4.34593500 | 0.57495000  | -0.73542100 |
| C | -4.05200200 | -2.15281000 | -0.20079900 |
| H | -1.94877300 | -1.79939000 | -0.28640600 |
| C | -5.46774400 | -0.22615500 | -0.59051400 |
| H | -4.47629100 | 1.63476800  | -0.93521800 |
| C | -5.33137200 | -1.59939900 | -0.31562600 |
| H | -3.91204600 | -3.20627700 | 0.00741100  |
| H | -6.46755300 | 0.18576700  | -0.68353600 |

|    |             |             |             |
|----|-------------|-------------|-------------|
| C  | -1.89319800 | 2.31659500  | -0.25351900 |
| C  | -1.38506600 | 3.44366700  | -0.91959300 |
| C  | -2.42515700 | 2.48829700  | 1.04315100  |
| C  | -1.43634000 | 4.70592700  | -0.32290500 |
| H  | -0.95497200 | 3.34898200  | -1.91010800 |
| C  | -2.46404400 | 3.75192800  | 1.64143700  |
| H  | -2.83065300 | 1.63572500  | 1.57536700  |
| C  | -1.97219400 | 4.86457500  | 0.95965900  |
| H  | -1.05105400 | 5.56606200  | -0.86270400 |
| H  | -2.88068000 | 3.86163700  | 2.63844900  |
| H  | -2.00419400 | 5.84669400  | 1.42202600  |
| C  | -1.46321000 | 0.88354100  | -2.37310600 |
| H  | -0.50577700 | 1.36537500  | -2.58591900 |
| H  | -1.40076400 | -0.14915800 | -2.72702700 |
| H  | -2.25635300 | 1.38554200  | -2.93220000 |
| C  | -0.63689800 | 0.33659100  | -0.06127100 |
| H  | -0.81654300 | 0.16742100  | 1.01475500  |
| O  | 0.50149200  | 0.10602700  | -0.54130600 |
| O  | -6.49342900 | -2.29276600 | -0.18069900 |
| C  | -6.41927900 | -3.68186800 | 0.10508700  |
| H  | -7.45076400 | -4.02851500 | 0.17951100  |
| H  | -5.91063600 | -4.23263200 | -0.69494300 |
| H  | -5.90429500 | -3.86927700 | 1.05657500  |
| Fe | 2.23530000  | -0.60087500 | 0.33750800  |
| Br | 4.09064700  | 1.09137200  | -0.25927400 |
| Br | 1.55939600  | -1.29155500 | 2.53755300  |
| Br | 3.57749400  | -1.69785400 | -1.53777600 |

### IM1b

SCF done: -1098.689012

|   |             |            |             |
|---|-------------|------------|-------------|
| C | -1.99833300 | 1.26940200 | 0.26499100  |
| C | -3.29669800 | 0.64285400 | -0.26375400 |

|    |             |             |             |
|----|-------------|-------------|-------------|
| C  | -4.54994400 | 1.13925300  | 0.10441600  |
| C  | -3.24711500 | -0.37349600 | -1.23286900 |
| C  | -5.72489500 | 0.63725000  | -0.45770500 |
| H  | -4.62160100 | 1.92968700  | 0.84512900  |
| C  | -4.40664300 | -0.89038600 | -1.79506200 |
| H  | -2.29018600 | -0.76508700 | -1.57328700 |
| C  | -5.65885800 | -0.38787200 | -1.41102200 |
| H  | -6.67730700 | 1.04926000  | -0.14667800 |
| H  | -4.36733300 | -1.67869200 | -2.53902400 |
| C  | -1.57507700 | 2.41137600  | -0.67437100 |
| H  | -0.62387900 | 2.87019200  | -0.40169800 |
| H  | -1.49682300 | 2.03735500  | -1.69805400 |
| H  | -2.34046400 | 3.19097100  | -0.65801700 |
| C  | -0.96385300 | 0.18887700  | 0.41435800  |
| H  | -1.32230600 | -0.74709200 | 0.86185400  |
| O  | 0.25193400  | 0.25209400  | 0.13026300  |
| Fe | 1.87668100  | 1.60452900  | -0.78014800 |
| Br | 1.99472900  | 3.86711200  | -0.01083000 |
| Br | 1.20193100  | -2.08279900 | -2.24519000 |
| Br | 1.40076300  | 0.78087500  | -3.17163800 |
| Fe | 1.49816100  | -1.59329900 | 0.30021800  |
| Br | 3.58726100  | -0.07389700 | 0.12942000  |
| Br | 1.65406200  | -2.09454300 | 2.83922100  |
| Br | -0.27366900 | -3.48138700 | 0.93491900  |
| O  | -6.73537900 | -0.95410300 | -2.01723300 |
| C  | -8.03168900 | -0.47741500 | -1.68233900 |
| H  | -8.14647800 | 0.58572300  | -1.92808200 |
| H  | -8.72982500 | -1.06213600 | -2.28237600 |
| H  | -8.25465900 | -0.62896300 | -0.61875800 |
| C  | -2.06688100 | 1.66874700  | 1.76843600  |
| C  | -1.39719900 | 2.80528000  | 2.25026100  |
| C  | -2.72567200 | 0.83201700  | 2.68952300  |

|   |             |             |            |
|---|-------------|-------------|------------|
| C | -1.42458200 | 3.11666200  | 3.60953300 |
| H | -0.85513800 | 3.45779600  | 1.57665600 |
| C | -2.74076700 | 1.14206600  | 4.04804800 |
| H | -3.24796000 | -0.05225500 | 2.33916300 |
| C | -2.09272600 | 2.28781800  | 4.51220200 |
| H | -0.91353000 | 4.00774000  | 3.96077400 |
| H | -3.25867100 | 0.48662900  | 4.74149600 |
| H | -2.10425000 | 2.53073500  | 5.57039900 |

### TS1b

SCF done: -1098.668369

|   |             |             |             |
|---|-------------|-------------|-------------|
| C | 1.81699400  | -1.40799600 | 0.26029000  |
| C | 3.22985500  | -1.11606200 | -0.07744900 |
| C | 3.56056300  | 0.01262800  | -0.84600000 |
| C | 4.27079200  | -1.99325600 | 0.29714800  |
| C | 4.87484400  | 0.26833500  | -1.23286600 |
| H | 2.78288000  | 0.68883900  | -1.18612000 |
| C | 5.57994500  | -1.74142200 | -0.06561300 |
| H | 4.05246800  | -2.86679000 | 0.90362500  |
| C | 5.89676100  | -0.60578100 | -0.83816200 |
| H | 5.08547500  | 1.13773400  | -1.84301900 |
| H | 6.38553300  | -2.40422600 | 0.23129500  |
| C | 1.41837500  | -0.90594400 | 2.02224400  |
| C | 0.49675000  | -1.69747500 | 2.73256200  |
| C | 2.43479900  | -0.21436800 | 2.71086500  |
| C | 0.59982600  | -1.79266900 | 4.11682500  |
| H | -0.31653200 | -2.20623400 | 2.22663000  |
| C | 2.51874900  | -0.30522400 | 4.09342300  |
| H | 3.14926100  | 0.38806700  | 2.15986500  |
| C | 1.60590200  | -1.10061900 | 4.79684100  |
| H | -0.11613400 | -2.39746200 | 4.66364300  |
| H | 3.29164600  | 0.24071700  | 4.62458300  |

|    |             |             |             |
|----|-------------|-------------|-------------|
| H  | 1.67693100  | -1.17548900 | 5.87778400  |
| C  | 1.31634800  | -2.79191700 | -0.05950500 |
| H  | 0.32435400  | -3.01499800 | 0.33030500  |
| H  | 1.26997900  | -2.86369800 | -1.15310200 |
| H  | 2.00834800  | -3.56035300 | 0.29069400  |
| C  | 0.93104900  | -0.30065100 | 0.50131700  |
| H  | 1.39703000  | 0.68395100  | 0.47404600  |
| O  | -0.38911900 | -0.27620300 | 0.26999200  |
| Fe | -1.88019900 | -1.54964800 | -0.39806300 |
| Br | -2.41119200 | -3.61282900 | 0.76580000  |
| Br | -0.86283800 | 1.53435800  | -2.67887100 |
| Br | -1.26342800 | -1.45508200 | -2.92539400 |
| Fe | -1.30378200 | 1.57686900  | -0.08490700 |
| Br | -3.60171200 | 0.35800600  | -0.09215200 |
| Br | -1.59875400 | 2.94275400  | 2.11274500  |
| Br | 0.74348100  | 3.36859900  | 0.22930300  |
| O  | 7.20339500  | -0.45437100 | -1.14469400 |
| C  | 7.60071100  | 0.67174100  | -1.92467400 |
| H  | 7.36066200  | 1.61307100  | -1.41683900 |
| H  | 8.68137000  | 0.58666400  | -2.03861000 |
| H  | 7.12795200  | 0.65796500  | -2.91348300 |

### IM2b

SCF done: -1098.686324

|   |             |             |            |
|---|-------------|-------------|------------|
| C | -1.00773000 | 1.78747100  | 1.90393700 |
| C | -2.10493500 | 0.91384800  | 1.96066800 |
| C | -1.93469600 | -0.50871300 | 1.86097800 |
| C | -3.45201200 | 1.40150600  | 2.09427600 |
| C | -3.00198000 | -1.37104300 | 1.88454100 |
| H | -0.94148900 | -0.92734100 | 1.77660500 |
| C | -4.52220100 | 0.55019500  | 2.08699100 |
| H | -3.63746300 | 2.46684900  | 2.14294000 |

|    |             |             |             |
|----|-------------|-------------|-------------|
| C  | -4.31497600 | -0.85051700 | 1.96751900  |
| H  | -2.82508700 | -2.43551800 | 1.80240900  |
| H  | -5.54175500 | 0.91380200  | 2.14516400  |
| C  | 1.49923800  | 2.28475300  | 1.45897400  |
| C  | 1.65806300  | 3.16417700  | 0.37855300  |
| C  | 2.41818400  | 2.33106500  | 2.51533600  |
| C  | 2.71192600  | 4.07661300  | 0.36368300  |
| H  | 0.96136100  | 3.14591700  | -0.45359300 |
| C  | 3.47088300  | 3.24832400  | 2.50182300  |
| H  | 2.32457500  | 1.63369500  | 3.34397000  |
| C  | 3.61921200  | 4.12272000  | 1.42522000  |
| H  | 2.82542500  | 4.74822400  | -0.48178300 |
| H  | 4.17986800  | 3.26679000  | 3.32402900  |
| H  | 4.44219200  | 4.83097100  | 1.40733800  |
| C  | -1.11188600 | 3.22774800  | 2.25128600  |
| H  | -1.01294400 | 3.81171900  | 1.32473200  |
| H  | -2.03873100 | 3.50312700  | 2.75003700  |
| H  | -0.25993800 | 3.51657300  | 2.87488900  |
| C  | 0.37549500  | 1.25612700  | 1.50300800  |
| H  | 0.64120300  | 0.55615400  | 2.31646800  |
| O  | 0.27373300  | 0.50991100  | 0.29747200  |
| Fe | -0.66709200 | 1.02070000  | -1.46430500 |
| Br | -1.92026100 | 3.11960400  | -1.52236600 |
| Br | -0.26432200 | -2.88846800 | -0.79123900 |
| Br | -2.28867800 | -0.98312000 | -1.97579300 |
| Fe | 1.48269100  | -0.96121300 | -0.25040900 |
| Br | 1.47529600  | 0.26082200  | -2.65987400 |
| Br | 3.88224200  | -1.88937400 | -0.18635200 |
| Br | 2.05659100  | -1.83645100 | 2.27607100  |
| O  | -5.41536600 | -1.58920700 | 1.94406000  |
| C  | -5.32597900 | -3.01209600 | 1.74087900  |
| H  | -4.79397200 | -3.48759100 | 2.56997400  |

|   |             |             |            |
|---|-------------|-------------|------------|
| H | -6.35649700 | -3.36206200 | 1.71327100 |
| H | -4.82928500 | -3.23212600 | 0.79218300 |

### TS2b

SCF done: -1098.665795

|    |             |             |             |
|----|-------------|-------------|-------------|
| C  | -2.02149900 | 0.21731700  | -0.87758200 |
| C  | -3.46415900 | -0.07743700 | -0.87496400 |
| C  | -4.03547500 | -1.21463500 | -0.25656700 |
| C  | -4.33003600 | 0.81680100  | -1.53120500 |
| C  | -5.39775300 | -1.43409900 | -0.29247100 |
| H  | -3.40384300 | -1.94965900 | 0.22810600  |
| C  | -5.70792000 | 0.62322200  | -1.54172400 |
| H  | -3.93362800 | 1.70330100  | -2.01318400 |
| C  | -6.25388200 | -0.51140000 | -0.92476000 |
| H  | -5.83368900 | -2.31881300 | 0.15832800  |
| H  | -6.33951700 | 1.35180400  | -2.03439600 |
| C  | -1.11704600 | -0.18406700 | 0.16189100  |
| H  | -1.33437800 | -1.06713800 | -0.73602200 |
| O  | 0.17608600  | 0.16365700  | 0.04999200  |
| Fe | 1.05871300  | 2.04372100  | 0.71022000  |
| Br | -0.80196000 | 3.54113600  | 1.12686500  |
| Br | 3.19589200  | -0.01989900 | -2.09264200 |
| Br | 2.32048500  | 2.79021700  | -1.45391600 |
| Fe | 1.80884800  | -0.98001700 | -0.13677600 |
| Br | 2.77185100  | 0.59065300  | 1.87338700  |
| Br | 2.60672400  | -3.31974000 | 0.58419900  |
| Br | 0.38684700  | -2.88919000 | -1.50589900 |
| C  | -1.43772500 | 0.99645600  | -2.02313700 |
| H  | -0.39391800 | 0.73188300  | -2.18950600 |
| H  | -2.00967900 | 0.85955900  | -2.94007400 |
| H  | -1.44354700 | 2.05783500  | -1.74091500 |
| O  | -7.56818500 | -0.81417900 | -0.89037700 |

|   |             |             |             |
|---|-------------|-------------|-------------|
| C | -8.49550800 | 0.06476500  | -1.52426800 |
| H | -8.29603000 | 0.14548400  | -2.59904400 |
| H | -9.47821300 | -0.38080600 | -1.37039400 |
| H | -8.47250700 | 1.06215800  | -1.07028300 |
| C | -1.55273800 | -0.67975200 | 1.51232000  |
| C | -1.08974300 | -1.90424200 | 2.01231800  |
| C | -2.34098400 | 0.15397700  | 2.31770100  |
| C | -1.42915600 | -2.29883700 | 3.30603100  |
| H | -0.47718800 | -2.55266000 | 1.39384900  |
| C | -2.66431600 | -0.24231400 | 3.61498900  |
| H | -2.67575600 | 1.11422000  | 1.93996600  |
| C | -2.21465800 | -1.46864500 | 4.10846400  |
| H | -1.07301900 | -3.25118100 | 3.68609400  |
| H | -3.26334100 | 0.41226000  | 4.24045900  |
| H | -2.47035400 | -1.77422100 | 5.11856600  |

### IM3b

SCF done: -1098.705607

|   |             |             |             |
|---|-------------|-------------|-------------|
| C | -2.19581600 | 0.01601800  | -0.71030600 |
| C | -3.42849300 | 0.81599300  | -0.29390200 |
| C | -4.71211500 | 0.32923900  | -0.59154300 |
| C | -3.32114900 | 2.06969400  | 0.31422300  |
| C | -5.84809300 | 1.06618100  | -0.28670200 |
| H | -4.82361100 | -0.63791800 | -1.07700000 |
| C | -4.45508000 | 2.82134100  | 0.63137500  |
| H | -2.34636400 | 2.48598900  | 0.55430000  |
| C | -5.72804900 | 2.32142600  | 0.33096300  |
| H | -6.84066300 | 0.69462600  | -0.51884400 |
| H | -4.32887900 | 3.78679800  | 1.10612500  |
| C | -1.13936500 | -0.09002300 | 0.37859500  |
| H | -2.51794700 | -1.02822300 | -0.84736300 |
| O | 0.05887200  | 0.25293900  | 0.11084100  |

|    |             |             |             |
|----|-------------|-------------|-------------|
| Fe | 1.26016100  | 2.18608000  | 0.18155000  |
| Br | 0.09711800  | 3.70616800  | 1.61663500  |
| Br | 2.35012900  | -0.33314800 | -2.70897600 |
| Br | 1.81968800  | 2.60496000  | -2.28280400 |
| Fe | 1.73137300  | -1.07823200 | -0.31297800 |
| Br | 3.17383800  | 0.69654900  | 0.99413400  |
| Br | 2.30877700  | -3.08681300 | 1.20189500  |
| Br | 0.27229500  | -3.18249900 | -1.06790800 |
| C  | -1.62470900 | 0.50671300  | -2.05064600 |
| H  | -0.79822000 | -0.11851900 | -2.39501400 |
| H  | -2.41759500 | 0.47942000  | -2.80184300 |
| H  | -1.26954300 | 1.53746700  | -1.97729400 |
| O  | -6.89769500 | 2.96486900  | 0.59230200  |
| C  | -6.84132900 | 4.24750300  | 1.20246600  |
| H  | -6.29722700 | 4.96703800  | 0.57818000  |
| H  | -7.87649200 | 4.57410400  | 1.30918200  |
| H  | -6.37210200 | 4.20281200  | 2.19323400  |
| C  | -1.43281200 | -0.62452200 | 1.70726300  |
| C  | -0.44173100 | -0.54019400 | 2.71131400  |
| C  | -2.66369900 | -1.24876200 | 2.00905000  |
| C  | -0.67653900 | -1.06266400 | 3.97631600  |
| H  | 0.50220400  | -0.05514100 | 2.49274900  |
| C  | -2.88489600 | -1.78195800 | 3.27173200  |
| H  | -3.44231400 | -1.31560400 | 1.26029400  |
| C  | -1.89534100 | -1.68756900 | 4.25658600  |
| H  | 0.08856000  | -0.98586300 | 4.74162900  |
| H  | -3.82868600 | -2.26955000 | 3.49297700  |
| H  | -2.07624800 | -2.10083300 | 5.24450200  |

### TS3b

SCF done: -1098.676303

|    |             |             |             |
|----|-------------|-------------|-------------|
| C  | -2.09345400 | -1.30367600 | 0.60165500  |
| C  | -2.20772000 | 0.53383200  | 0.40760500  |
| C  | -1.70707000 | 1.31137700  | 1.47895400  |
| C  | -3.34585700 | 1.00730400  | -0.30147500 |
| C  | -2.30705500 | 2.50511800  | 1.83564500  |
| H  | -0.80690300 | 1.00213600  | 1.99712500  |
| C  | -3.94584600 | 2.19348500  | 0.04427900  |
| H  | -3.74435500 | 0.42502100  | -1.12538000 |
| C  | -3.43365900 | 2.95893200  | 1.11955400  |
| H  | -1.88543600 | 3.08979700  | 2.64331700  |
| H  | -4.80499600 | 2.57479100  | -0.49599700 |
| C  | -1.62847300 | -1.72798200 | 1.96886100  |
| H  | -1.34909300 | -2.78493900 | 1.87783400  |
| H  | -0.74968400 | -1.18412600 | 2.31000200  |
| H  | -2.42541600 | -1.65924500 | 2.71274100  |
| C  | -1.22613900 | -0.55328500 | -0.28522200 |
| H  | -1.47808500 | -0.57850500 | -1.34664100 |
| O  | 0.09790700  | -0.39744600 | -0.01892100 |
| Fe | 1.55521200  | -1.95751000 | 0.18496900  |
| Br | 0.46297600  | -3.99717100 | -0.53633900 |
| Br | 2.18997800  | 1.45603500  | 1.91168400  |
| Br | 2.35629300  | -1.49609200 | 2.57851000  |
| Fe | 1.25605600  | 1.08202600  | -0.66476300 |
| Br | 3.14553000  | -0.59449200 | -1.33716100 |
| Br | -0.00058200 | 1.52380800  | -3.03862200 |
| Br | 1.04501000  | 3.61815500  | -1.06345800 |
| O  | -4.08612400 | 4.09737600  | 1.37495600  |
| C  | -3.61786200 | 4.96430200  | 2.41547000  |
| H  | -2.59867800 | 5.30600900  | 2.20914100  |

|   |             |             |             |
|---|-------------|-------------|-------------|
| H | -4.29796800 | 5.81511500  | 2.41308000  |
| H | -3.65667400 | 4.46488100  | 3.38907600  |
| C | -3.29255700 | -1.99553200 | 0.05659900  |
| C | -3.22685300 | -2.63343500 | -1.19390500 |
| C | -4.47524300 | -2.08852800 | 0.81181700  |
| C | -4.32529700 | -3.34594400 | -1.67673100 |
| H | -2.30307900 | -2.62091100 | -1.76199900 |
| C | -5.57204800 | -2.78790400 | 0.31935800  |
| H | -4.54213900 | -1.59204900 | 1.77519300  |
| C | -5.49888100 | -3.41927600 | -0.92694100 |
| H | -4.25569300 | -3.85026600 | -2.63531800 |
| H | -6.48386600 | -2.84414300 | 0.90596000  |
| H | -6.35322500 | -3.97164900 | -1.30637700 |

#### IM4b

SCF done: -1098.68147

|   |            |             |             |
|---|------------|-------------|-------------|
| C | 2.23479300 | -0.60658800 | -1.00103800 |
| C | 3.53582900 | -1.20664300 | -0.78878700 |
| C | 3.81437700 | -1.95510100 | 0.38344200  |
| C | 4.54649400 | -1.10804500 | -1.77686400 |
| C | 5.04966000 | -2.56455600 | 0.55661600  |
| H | 3.03987800 | -2.11616900 | 1.12275600  |
| C | 5.78416300 | -1.70626600 | -1.58946200 |
| H | 4.36634100 | -0.53895100 | -2.68124800 |
| C | 6.03912000 | -2.43580500 | -0.42282700 |
| H | 5.23681200 | -3.15538200 | 1.44716800  |
| H | 6.55203700 | -1.60921000 | -2.35005300 |
| C | 1.94672600 | 1.25100000  | 0.17942600  |
| C | 1.28474200 | 2.27993100  | -0.51271400 |
| C | 3.09763900 | 1.56648800  | 0.93217300  |

|    |             |             |             |
|----|-------------|-------------|-------------|
| C  | 1.72813200  | 3.59466000  | -0.43046900 |
| H  | 0.38450000  | 2.05898200  | -1.07581900 |
| C  | 3.54909300  | 2.86816900  | 1.01595100  |
| H  | 3.62790400  | 0.78346600  | 1.46519500  |
| C  | 2.86744900  | 3.89869700  | 0.33452500  |
| H  | 1.17578100  | 4.37161600  | -0.94408400 |
| H  | 4.41834300  | 3.12896200  | 1.60958800  |
| C  | 1.75196400  | -0.33118100 | -2.38753500 |
| H  | 0.75647900  | 0.10790300  | -2.38805600 |
| H  | 2.43859200  | 0.31627700  | -2.94178800 |
| H  | 1.70793400  | -1.28758900 | -2.92083900 |
| C  | 1.38271300  | -0.19159200 | 0.15172300  |
| O  | 0.01198600  | -0.24487500 | -0.06057400 |
| Fe | -1.09364700 | -1.88921700 | -0.78864400 |
| Br | 0.59866100  | -3.64669700 | -0.94795200 |
| Br | -2.67365700 | 1.58500900  | -1.05003100 |
| Br | -2.24783100 | -0.85089700 | -2.81860500 |
| Fe | -1.34827700 | 0.52713400  | 1.14765600  |
| Br | -2.75182100 | -1.69616900 | 1.17445000  |
| Br | -0.01178100 | 0.29820800  | 3.50764700  |
| Br | -1.75827500 | 2.63256900  | 2.56638400  |
| H  | 7.00467700  | -2.91249400 | -0.28283300 |
| O  | 3.38620000  | 5.13344800  | 0.47963500  |
| C  | 2.73426000  | 6.23804100  | -0.14784400 |
| H  | 3.32066900  | 7.11688600  | 0.11946100  |
| H  | 2.72204900  | 6.12483100  | -1.23786300 |
| H  | 1.70984400  | 6.35500000  | 0.22243800  |
| H  | 1.66328000  | -0.68731400 | 1.08423400  |

### TS4b

SCF done: -1098.666707

|   |            |             |             |
|---|------------|-------------|-------------|
| C | 1.67380300 | -1.17572400 | -1.56220300 |
|---|------------|-------------|-------------|

|    |             |             |             |
|----|-------------|-------------|-------------|
| C  | 3.06160200  | -1.19985900 | -2.05973700 |
| C  | 3.86320800  | -0.04579700 | -2.17056500 |
| C  | 3.60052000  | -2.44297800 | -2.44641600 |
| C  | 5.16359100  | -0.13957300 | -2.65116900 |
| H  | 3.46042500  | 0.92631100  | -1.90901300 |
| C  | 4.91745600  | -2.53271600 | -2.89138800 |
| H  | 3.00411000  | -3.34479600 | -2.36375900 |
| C  | 5.69932200  | -1.38271100 | -3.00211800 |
| H  | 5.76120900  | 0.76051800  | -2.75381000 |
| H  | 5.32608200  | -3.50136500 | -3.16063300 |
| C  | 1.21159000  | -0.25965400 | -0.55696100 |
| H  | 1.21589300  | 0.29585800  | -1.66732300 |
| O  | -0.09275200 | -0.34404600 | -0.19289300 |
| Fe | -0.85664200 | -1.65155300 | 1.34710500  |
| Br | 0.86104700  | -3.33824900 | 1.66252400  |
| Br | -3.58908300 | -0.09364700 | -1.27200100 |
| Br | -2.89217700 | -2.69554900 | 0.08002100  |
| Fe | -1.50147200 | 1.05392100  | -0.27404300 |
| Br | -1.85667100 | 0.44106300  | 2.36403000  |
| Br | -1.70044400 | 3.62315500  | -0.26538900 |
| Br | -0.37437500 | 2.09735800  | -2.58063900 |
| C  | 0.67223100  | -2.11500200 | -2.15606900 |
| H  | -0.31928700 | -1.66149800 | -2.18644600 |
| H  | 0.96667100  | -2.45609100 | -3.14758800 |
| H  | 0.58644200  | -2.97597600 | -1.47715000 |
| C  | 2.12073400  | 0.47108000  | 0.38750500  |
| C  | 1.91476200  | 1.82701000  | 0.66335500  |
| C  | 3.11849300  | -0.22454200 | 1.09357300  |
| C  | 2.68912400  | 2.49370900  | 1.61076600  |
| H  | 1.14973500  | 2.38598100  | 0.13329500  |
| C  | 3.88662900  | 0.42716900  | 2.04489100  |
| H  | 3.27073800  | -1.28367100 | 0.91755400  |



|   |            |             |             |
|---|------------|-------------|-------------|
| C | 3.68134700 | 1.79229700  | 2.31090900  |
| H | 2.50533500 | 3.54434000  | 1.79771100  |
| H | 4.64544300 | -0.10242800 | 2.61063800  |
| H | 6.71931400 | -1.45094900 | -3.36764300 |
| O | 4.48634200 | 2.33438400  | 3.25594000  |
| C | 4.29259700 | 3.69789900  | 3.61779100  |
| H | 5.02159500 | 3.90407300  | 4.40190000  |
| H | 4.47420700 | 4.36861900  | 2.76914900  |
| H | 3.28191900 | 3.86860300  | 4.00698300  |

### IM5b

SCF done: -1098.712845

|    |             |             |             |
|----|-------------|-------------|-------------|
| C  | 1.88936700  | -1.05031400 | -1.49252700 |
| C  | 3.06134400  | -1.96287200 | -1.12798800 |
| C  | 4.18304400  | -2.01485900 | -1.96712400 |
| C  | 3.00972100  | -2.80954600 | -0.01325800 |
| C  | 5.23513300  | -2.89058700 | -1.69605200 |
| H  | 4.23050800  | -1.37076800 | -2.84258900 |
| C  | 4.06420300  | -3.68220300 | 0.25982300  |
| H  | 2.15184100  | -2.79532100 | 0.65340200  |
| C  | 5.17893900  | -3.72596300 | -0.57902800 |
| H  | 6.09620200  | -2.91920900 | -2.35750300 |
| H  | 4.00887800  | -4.32808000 | 1.13104800  |
| C  | 1.32499600  | -0.26632200 | -0.31250100 |
| H  | 2.28034400  | -0.26794600 | -2.16076700 |
| O  | 0.06486200  | -0.34063500 | -0.07342600 |
| Fe | -1.20397600 | -1.68574000 | 1.19905600  |
| Br | 0.18497700  | -2.74829300 | 2.83436300  |
| Br | -3.01626200 | -0.29977900 | -2.08544200 |
| Br | -2.67486200 | -2.86806600 | -0.53454700 |
| Fe | -1.45009500 | 1.10324400  | -0.57764500 |
| Br | -2.52056700 | 0.44997500  | 1.74023300  |

|    |             |             |             |
|----|-------------|-------------|-------------|
| Br | -1.13287400 | 3.61511400  | -0.03833700 |
| Br | -0.11959300 | 2.27504300  | -2.58255700 |
| C  | 0.80901300  | -1.82507700 | -2.26637500 |
| H  | 0.00953100  | -1.16895600 | -2.61625400 |
| H  | 1.27037600  | -2.30234500 | -3.13433400 |
| H  | 0.36449800  | -2.60983600 | -1.64993100 |
| C  | 2.14184800  | 0.59228200  | 0.50988800  |
| C  | 1.57644500  | 1.19481500  | 1.66041400  |
| C  | 3.49924000  | 0.88114100  | 0.20391800  |
| C  | 2.31094300  | 2.04227900  | 2.46864200  |
| H  | 0.54810700  | 0.97824800  | 1.92413300  |
| C  | 4.23448000  | 1.73434800  | 0.99468800  |
| H  | 3.97248400  | 0.43072000  | -0.65908500 |
| C  | 3.65053200  | 2.32540200  | 2.13760600  |
| H  | 1.84660300  | 2.47694600  | 3.34448600  |
| H  | 5.26753100  | 1.97008900  | 0.76506300  |
| H  | 5.99741800  | -4.40673700 | -0.36478300 |
| O  | 4.45248600  | 3.13559200  | 2.84303200  |
| C  | 3.94264300  | 3.78505600  | 4.01184100  |
| H  | 4.76792900  | 4.38277200  | 4.39742700  |
| H  | 3.10022500  | 4.43869800  | 3.76253400  |
| H  | 3.63557100  | 3.05301500  | 4.76616000  |

### 3b

SCF done: -934.3556397

|   |             |             |             |
|---|-------------|-------------|-------------|
| C | -1.27446000 | -1.33631000 | -1.49516700 |
| C | 0.04491300  | -1.77131300 | -2.15544800 |
| H | 0.77147000  | -2.11609700 | -1.41487100 |
| H | -0.15341700 | -2.60585500 | -2.83303200 |
| H | 0.49312300  | -0.95620200 | -2.73109700 |
| C | -1.10824900 | -0.09551600 | -0.61979500 |
| O | 0.02099800  | 0.19657600  | -0.16303500 |

|    |             |             |             |   |             |             |             |
|----|-------------|-------------|-------------|---|-------------|-------------|-------------|
| Fe | 1.96159500  | 0.01162800  | 0.21833000  | C | -6.64497700 | 3.18186500  | 0.36408000  |
| Br | 3.23544600  | 1.02550900  | -1.79177900 | H | -7.20448200 | 4.02568700  | 0.76759800  |
| Br | 2.70095900  | 2.38744000  | 0.93764800  | H | -6.75660000 | 3.15842500  | -0.72593100 |
| Br | 2.66414200  | -1.99409100 | 1.33812800  | H | -7.03021600 | 2.25018100  | 0.79374100  |
| H  | -1.98034400 | -1.06821300 | -2.28864900 | C | -1.90507000 | -2.47098600 | -0.68083300 |
| C  | -2.23688300 | 0.77260800  | -0.29165100 | C | -3.04674500 | -3.12820200 | -1.15786300 |
| C  | -2.00014400 | 1.94903800  | 0.46150100  | C | -1.32963300 | -2.89839100 | 0.52406300  |
| C  | -3.55648700 | 0.49400300  | -0.69625700 | C | -3.60796300 | -4.18892700 | -0.44543200 |
| C  | -3.03273400 | 2.80292800  | 0.78608700  | H | -3.49226200 | -2.81889700 | -2.10102900 |
| H  | -0.98739700 | 2.17563500  | 0.77501100  | C | -1.89349600 | -3.95696400 | 1.23740300  |
| C  | -4.60506700 | 1.34336900  | -0.37003400 | H | -0.42978400 | -2.42203500 | 0.90277000  |
| H  | -3.77973400 | -0.40835600 | -1.25216600 | C | -3.03446700 | -4.60290000 | 0.75777600  |
| C  | -4.34849900 | 2.50869200  | 0.37383700  | H | -4.48905200 | -4.69233900 | -0.83298500 |
| H  | -2.86087500 | 3.70889000  | 1.35686800  | H | -1.43380300 | -4.27783100 | 2.16736700  |
| H  | -5.60964300 | 1.09656100  | -0.68999000 | H | -3.46981300 | -5.42740100 | 1.31454800  |
| O  | -5.28699900 | 3.40311500  | 0.74075600  |   |             |             |             |

| <b>Cartesian</b>       | <b>Coordinates</b> | <b>for</b>  | <b>the</b>  | <b>Stationary</b> | <b>Points</b> | <b>Given</b> | <b>in</b>   | <b>Fig.</b> | <b>9.</b> |
|------------------------|--------------------|-------------|-------------|-------------------|---------------|--------------|-------------|-------------|-----------|
|                        |                    |             |             | H                 | -6.44077000   | 0.26171600   | -0.75236100 |             |           |
|                        |                    |             |             | C                 | -1.89431300   | 2.30343200   | -0.24103900 |             |           |
|                        |                    |             |             | C                 | -1.42616700   | 3.43598100   | -0.92277400 |             |           |
|                        |                    |             |             | C                 | -2.40180100   | 2.46557300   | 1.06087200  |             |           |
|                        |                    |             |             | C                 | -1.48889500   | 4.69778800   | -0.32951800 |             |           |
|                        |                    |             |             | H                 | -1.01879900   | 3.34599200   | -1.92270800 |             |           |
|                        |                    |             |             | C                 | -2.45458600   | 3.72519100   | 1.65497100  |             |           |
|                        |                    |             |             | H                 | -2.77678000   | 1.60526800   | 1.60704700  |             |           |
|                        |                    |             |             | C                 | -1.99909500   | 4.84704600   | 0.96032300  |             |           |
|                        |                    |             |             | H                 | -1.13300700   | 5.56413800   | -0.87892700 |             |           |
|                        |                    |             |             | H                 | -2.85245100   | 3.82781100   | 2.65996500  |             |           |
|                        |                    |             |             | H                 | -2.04073900   | 5.82922600   | 1.42127600  |             |           |
| <b>1c</b>              |                    |             |             |                   |               |              |             |             |           |
| SCF done: -1156.919522 |                    |             |             |                   |               |              |             |             |           |
| C                      | -1.77985400        | 0.88327500  | -0.85003600 |                   |               |              |             |             |           |
| C                      | -3.04089600        | 0.03684100  | -0.61979300 |                   |               |              |             |             |           |
| C                      | -2.93971400        | -1.33725700 | -0.36762200 |                   |               |              |             |             |           |
| C                      | -4.31711400        | 0.60187000  | -0.75532600 |                   |               |              |             |             |           |
| C                      | -4.08070900        | -2.12869100 | -0.23412700 |                   |               |              |             |             |           |
| H                      | -1.96499300        | -1.81232000 | -0.28414700 |                   |               |              |             |             |           |
| C                      | -5.45870200        | -0.18424000 | -0.63467600 |                   |               |              |             |             |           |
| H                      | -4.41774400        | 1.66387600  | -0.95403200 |                   |               |              |             |             |           |
| C                      | -5.34300300        | -1.55219600 | -0.36802800 |                   |               |              |             |             |           |
| H                      | -3.98784900        | -3.19064700 | -0.03665900 |                   |               |              |             |             |           |

|    |             |             |             |
|----|-------------|-------------|-------------|
| C  | -1.42962500 | 0.87127200  | -2.35099100 |
| H  | -0.46470700 | 1.34271200  | -2.54626000 |
| H  | -1.37210300 | -0.15978600 | -2.70745700 |
| H  | -2.20607600 | 1.38628000  | -2.92157900 |
| C  | -0.63163600 | 0.32551700  | -0.02986700 |
| H  | -0.82153300 | 0.13760100  | 1.03842200  |
| O  | 0.49435000  | 0.12964800  | -0.48708500 |
| Fe | 2.26984900  | -0.49404100 | 0.40114000  |
| Br | 4.08306300  | 1.02895800  | -0.57731900 |
| Br | 1.55475200  | -0.98038800 | 2.64266000  |
| Br | 3.44952600  | -1.94406600 | -1.35400000 |
| C  | -6.58765000 | -2.37956100 | -0.18307000 |
| F  | -7.55486200 | -2.01954000 | -1.05557500 |
| F  | -6.34922200 | -3.69646200 | -0.35582800 |
| F  | -7.10353400 | -2.22649100 | 1.05779600  |

### IM1c

SCF done: -1321.279568

|   |             |             |             |
|---|-------------|-------------|-------------|
| C | -1.57252200 | 1.49708200  | 0.30101800  |
| C | -2.97824400 | 0.95927800  | -0.00598800 |
| C | -4.11854400 | 1.66969400  | 0.39134600  |
| C | -3.13930600 | -0.19105500 | -0.78959600 |
| C | -5.38912700 | 1.23257200  | 0.02715400  |
| H | -4.01375900 | 2.56811500  | 0.99072100  |
| C | -4.40981800 | -0.63808600 | -1.14988200 |
| H | -2.27238700 | -0.74384100 | -1.14505300 |
| C | -5.53752800 | 0.07369100  | -0.73954300 |
| H | -6.26580900 | 1.79368800  | 0.33164600  |
| H | -4.52150000 | -1.52883700 | -1.75818500 |
| C | -1.16094900 | 2.45821300  | -0.82737100 |
| H | -0.14746700 | 2.84393000  | -0.71405900 |
| H | -1.22990000 | 1.94868300  | -1.79161900 |

|    |             |             |             |
|----|-------------|-------------|-------------|
| H  | -1.84443900 | 3.31056800  | -0.84509400 |
| C  | -0.62476500 | 0.34357300  | 0.49092800  |
| H  | -1.01444200 | -0.50019100 | 1.07560600  |
| O  | 0.55981300  | 0.26753300  | 0.10491600  |
| Fe | 2.25532900  | 1.36624800  | -1.03917600 |
| Br | 2.53173100  | 3.70457400  | -0.61815400 |
| Br | 1.23089500  | -2.40346600 | -2.02762300 |
| Br | 1.58473300  | 0.31070100  | -3.29023200 |
| Fe | 1.67424600  | -1.65688100 | 0.42236800  |
| Br | 3.86032000  | -0.32277700 | 0.01064700  |
| Br | 1.89104500  | -1.87409800 | 2.99172300  |
| Br | -0.23316900 | -3.29075200 | 1.33260100  |
| C  | -1.43899500 | 2.08776000  | 1.73385300  |
| C  | -0.62469200 | 3.20332800  | 1.98744100  |
| C  | -2.06084700 | 1.44183800  | 2.81957500  |
| C  | -0.47323100 | 3.68277500  | 3.28820500  |
| H  | -0.10735200 | 3.70913800  | 1.18133200  |
| C  | -1.89769900 | 1.91949100  | 4.11848900  |
| H  | -2.69280900 | 0.57631000  | 2.64731400  |
| C  | -1.10527600 | 3.04367400  | 4.35626500  |
| H  | 0.14846400  | 4.55522500  | 3.46347200  |
| H  | -2.38951100 | 1.41135600  | 4.94211700  |
| H  | -0.97742000 | 3.41669500  | 5.36783000  |
| C  | -6.91422100 | -0.43545100 | -1.08000100 |
| F  | -6.92559900 | -1.09261100 | -2.25873700 |
| F  | -7.81229200 | 0.56964500  | -1.16033100 |
| F  | -7.36643500 | -1.29717700 | -0.14131100 |

### TS1c

SCF done: -1321.251417

|   |            |             |             |
|---|------------|-------------|-------------|
| C | 1.78369000 | -1.40542500 | 0.22276700  |
| C | 3.20604800 | -1.12079800 | -0.08582700 |

|    |             |             |             |
|----|-------------|-------------|-------------|
| C  | 3.54429200  | 0.03122000  | -0.81923100 |
| C  | 4.22421600  | -2.02685400 | 0.26816300  |
| C  | 4.86788500  | 0.27197400  | -1.18475800 |
| H  | 2.77406300  | 0.72366300  | -1.14123400 |
| C  | 5.54410200  | -1.77599700 | -0.07986200 |
| H  | 3.98635800  | -2.91575100 | 0.84296900  |
| C  | 5.86725000  | -0.62470200 | -0.80874100 |
| H  | 5.11813100  | 1.15084800  | -1.76785700 |
| H  | 6.32533500  | -2.47299800 | 0.20294500  |
| C  | 1.36279100  | -0.85444100 | 2.05934300  |
| C  | 0.48981400  | -1.70518900 | 2.76253900  |
| C  | 2.41276500  | -0.20153700 | 2.73634300  |
| C  | 0.65985000  | -1.87946800 | 4.13240000  |
| H  | -0.33784400 | -2.19591600 | 2.26246200  |
| C  | 2.56779400  | -0.37703800 | 4.10454500  |
| H  | 3.09081500  | 0.44730700  | 2.19158300  |
| C  | 1.69487000  | -1.22095000 | 4.80263000  |
| H  | -0.02337100 | -2.52346200 | 4.67636000  |
| H  | 3.36273100  | 0.14283900  | 4.62922700  |
| H  | 1.82113100  | -1.36134400 | 5.87193600  |
| C  | 1.27601500  | -2.77378400 | -0.10272700 |
| H  | 0.29574200  | -3.00157600 | 0.31119200  |
| H  | 1.18118800  | -2.80569500 | -1.19734900 |
| H  | 1.98162300  | -3.55529300 | 0.18571300  |
| C  | 0.91358100  | -0.30222700 | 0.57156500  |
| H  | 1.39219500  | 0.67589300  | 0.50075100  |
| O  | -0.41519000 | -0.25625300 | 0.32864600  |
| Fe | -2.02798700 | -1.48007300 | -0.29795500 |
| Br | -2.35964500 | -3.60645400 | 0.82558500  |
| Br | -0.72123400 | 1.36756500  | -2.76044900 |
| Br | -1.34648700 | -1.59045700 | -2.83807700 |
| Fe | -1.18190100 | 1.59977900  | -0.19794700 |

|    |             |             |             |
|----|-------------|-------------|-------------|
| Br | -3.58907600 | 0.52582600  | -0.18492600 |
| Br | -1.47949000 | 3.08577400  | 1.92169300  |
| Br | 0.89836200  | 3.35457000  | 0.05304800  |
| C  | 7.31294200  | -0.33906900 | -1.13822200 |
| F  | 7.98597500  | -1.47447100 | -1.41651400 |
| F  | 7.93589100  | 0.24787100  | -0.09321500 |
| F  | 7.43248000  | 0.48533300  | -2.19600200 |

### IM4c

SCF done: -1321.25769

|   |             |             |             |
|---|-------------|-------------|-------------|
| C | -1.51196900 | 1.25791800  | -0.19553400 |
| C | -2.91999200 | 0.96715500  | -0.36669600 |
| C | -3.39254200 | -0.37096600 | -0.37458600 |
| C | -3.85351700 | 2.01435300  | -0.57206000 |
| C | -4.73754800 | -0.64068300 | -0.58788800 |
| H | -2.70343200 | -1.20243700 | -0.27461600 |
| C | -5.20022300 | 1.73934400  | -0.74776100 |
| H | -3.52699600 | 3.04715300  | -0.54426300 |
| C | -5.64229000 | 0.41105500  | -0.76187400 |
| H | -5.08424800 | -1.66705200 | -0.62974800 |
| H | -5.91044900 | 2.54646700  | -0.88562400 |
| C | -0.92021800 | 1.02583600  | 2.02379700  |
| C | -0.17013000 | 2.12570600  | 2.46609600  |
| C | -1.90944700 | 0.47760600  | 2.85819800  |
| C | -0.38233100 | 2.64082200  | 3.74441400  |
| H | 0.60408100  | 2.56691500  | 1.84745000  |
| C | -2.11961300 | 0.99977200  | 4.12998500  |
| H | -2.49243300 | -0.37528200 | 2.52305300  |
| C | -1.35734700 | 2.08556300  | 4.57494200  |
| H | 0.21941600  | 3.47677200  | 4.08659200  |
| H | -2.86751600 | 0.55449600  | 4.77859000  |
| H | -1.52229100 | 2.49331400  | 5.56764500  |

|    |             |             |             |
|----|-------------|-------------|-------------|
| C  | -0.89867800 | 2.41286700  | -0.87504500 |
| H  | -0.11730700 | 2.90917100  | -0.29095300 |
| H  | -0.36924600 | 1.98542000  | -1.74931500 |
| H  | -1.61165200 | 3.14345000  | -1.25343700 |
| C  | -0.65480600 | 0.36398600  | 0.63871700  |
| H  | -1.09300600 | -0.63588000 | 0.69740800  |
| O  | 0.67767300  | 0.25740000  | 0.25732000  |
| Fe | 2.24366700  | 1.42278300  | -0.22638000 |
| Br | 2.58498700  | 3.78015100  | 0.27505400  |
| Br | 1.65060700  | -1.81411400 | -2.52621600 |
| Br | 2.12105400  | 1.14114400  | -2.87298700 |
| Fe | 1.54963600  | -1.60454800 | 0.06205900  |
| Br | 3.87967700  | -0.46445600 | 0.44793900  |
| Br | 1.37166800  | -2.84321300 | 2.36742600  |
| Br | -0.63317100 | -3.29676400 | 0.13550900  |
| C  | -7.11835300 | 0.11287400  | -0.91652000 |
| F  | -7.74515800 | 1.08011900  | -1.61231000 |
| F  | -7.70871600 | 0.03083600  | 0.29280200  |
| F  | -7.31912000 | -1.05665200 | -1.54976500 |

### TS2c

SCF done: -1321.250743

|   |             |             |             |
|---|-------------|-------------|-------------|
| C | -1.67975700 | 0.38992100  | -0.83827500 |
| C | -3.13910400 | 0.17664500  | -0.78922200 |
| C | -3.73619100 | -0.95882900 | -0.20516700 |
| C | -3.96668600 | 1.16325400  | -1.35764400 |
| C | -5.11678600 | -1.09593500 | -0.19049000 |
| H | -3.12297800 | -1.74755000 | 0.21490200  |
| C | -5.35253100 | 1.03690600  | -1.31172900 |
| H | -3.53250700 | 2.05030400  | -1.80474400 |
| C | -5.92847000 | -0.09454700 | -0.73540000 |
| H | -5.56737400 | -1.97896900 | 0.24925400  |

|    |             |             |             |
|----|-------------|-------------|-------------|
| H  | -5.98278000 | 1.81466900  | -1.72693000 |
| C  | -0.78450300 | -0.07275000 | 0.18285500  |
| H  | -1.03182900 | -1.00739500 | -0.59618200 |
| O  | 0.53126800  | 0.20117300  | 0.03117100  |
| Fe | 1.54039600  | 2.01699700  | 0.64219600  |
| Br | -0.22790100 | 3.64666100  | 0.97234700  |
| Br | 3.48793500  | -0.29046200 | -2.12560800 |
| Br | 2.83100000  | 2.59598800  | -1.55939400 |
| Fe | 2.06454600  | -1.06953400 | -0.12454900 |
| Br | 3.16081400  | 0.48190600  | 1.83281500  |
| Br | 2.63895100  | -3.45242400 | 0.66730400  |
| Br | 0.42565200  | -2.90505200 | -1.39703600 |
| C  | -1.08192100 | 1.07614600  | -2.02320900 |
| H  | -0.08368800 | 0.69004800  | -2.23529600 |
| H  | -1.71650300 | 1.00777300  | -2.90579100 |
| H  | -0.93850000 | 2.13192000  | -1.74873500 |
| C  | -1.22741300 | -0.44172000 | 1.57568800  |
| C  | -0.81514900 | -1.65013600 | 2.15321300  |
| C  | -1.96113600 | 0.48180200  | 2.33322400  |
| C  | -1.14871100 | -1.93851700 | 3.47599000  |
| H  | -0.24030000 | -2.36702800 | 1.57537500  |
| C  | -2.28183600 | 0.19021100  | 3.65866500  |
| H  | -2.25329800 | 1.43208000  | 1.89946300  |
| C  | -1.88129500 | -1.01919800 | 4.22983200  |
| H  | -0.82957300 | -2.87793500 | 3.91614500  |
| H  | -2.83816100 | 0.91446500  | 4.24552400  |
| H  | -2.13331500 | -1.24179900 | 5.26222700  |
| C  | -7.42655300 | -0.28262300 | -0.74336600 |
| F  | -8.07669500 | 0.88148100  | -0.93583600 |
| F  | -7.80028400 | -1.12564800 | -1.72906900 |
| F  | -7.85806500 | -0.81242800 | 0.41955000  |

**TS3c**

SCF done: -1321.254977

|    |             |             |             |
|----|-------------|-------------|-------------|
| C  | -2.08511700 | -1.34604500 | 0.60176600  |
| C  | -2.28312000 | 0.52024200  | 0.47585200  |
| C  | -1.75182900 | 1.29713300  | 1.51966700  |
| C  | -3.40208900 | 0.97460300  | -0.24597900 |
| C  | -2.34184300 | 2.51521500  | 1.83941100  |
| H  | -0.85740600 | 0.98312900  | 2.04397200  |
| C  | -3.97851100 | 2.19637400  | 0.07023000  |
| H  | -3.81756300 | 0.37175600  | -1.04601400 |
| C  | -3.45167500 | 2.96264400  | 1.11733800  |
| H  | -1.93433200 | 3.12060900  | 2.64097500  |
| H  | -4.83699800 | 2.55581100  | -0.48563900 |
| C  | -1.62272700 | -1.76258400 | 1.97143800  |
| H  | -1.33314400 | -2.81673600 | 1.88240600  |
| H  | -0.75046100 | -1.20957100 | 2.31492600  |
| H  | -2.42460100 | -1.69879800 | 2.70994900  |
| C  | -1.22446100 | -0.60167700 | -0.27492600 |
| H  | -1.51003700 | -0.54427700 | -1.32669500 |
| O  | 0.07021400  | -0.39336200 | -0.01293300 |
| Fe | 1.59623500  | -1.93429800 | 0.21815900  |
| Br | 0.48199600  | -3.98481700 | -0.42175600 |
| Br | 2.14407400  | 1.56066300  | 1.81349600  |
| Br | 2.38592500  | -1.36067200 | 2.58481400  |
| Fe | 1.20495600  | 1.11112800  | -0.72402300 |
| Br | 3.09310100  | -0.57786900 | -1.37948000 |
| Br | -0.12311900 | 1.43169100  | -3.07155200 |
| Br | 1.01757900  | 3.61230800  | -1.25031200 |
| C  | -3.28164500 | -2.03269200 | 0.04983900  |
| C  | -3.21959600 | -2.63783500 | -1.21784900 |
| C  | -4.45708800 | -2.15593500 | 0.81303900  |
| C  | -4.31571100 | -3.34693300 | -1.71037300 |

|   |             |             |             |
|---|-------------|-------------|-------------|
| H | -2.30035200 | -2.60559100 | -1.79260100 |
| C | -5.55076200 | -2.85233100 | 0.31099800  |
| H | -4.52223400 | -1.68474700 | 1.78895100  |
| C | -5.48172900 | -3.45013700 | -0.95242700 |
| H | -4.24981300 | -3.82618700 | -2.68184700 |
| H | -6.45707800 | -2.93265600 | 0.90298700  |
| H | -6.33402600 | -4.00080600 | -1.33865900 |
| C | -4.05427300 | 4.31542900  | 1.42455900  |
| F | -5.38181700 | 4.32349600  | 1.18593600  |
| F | -3.86248700 | 4.66046300  | 2.71222800  |
| F | -3.49776300 | 5.27083000  | 0.65666200  |

**IM2c**

SCF done: -1321.275047

|   |             |             |             |
|---|-------------|-------------|-------------|
| C | 0.08957600  | 2.57682200  | 0.13554000  |
| C | 1.68736000  | 0.67124000  | -0.15659500 |
| C | 1.81822400  | -0.17964400 | 0.95021300  |
| C | 2.82680100  | 1.00770300  | -0.89727700 |
| C | 3.06796100  | -0.68093100 | 1.31041700  |
| H | 0.94205100  | -0.46212000 | 1.52366000  |
| C | 4.07657300  | 0.50952900  | -0.53803000 |
| H | 2.73984800  | 1.65699900  | -1.76210200 |
| C | 4.19899400  | -0.33404700 | 0.56855700  |
| H | 3.16278900  | -1.33768600 | 2.16838000  |
| H | 4.95523900  | 0.77286200  | -1.11625400 |
| C | -0.02387900 | 2.50483200  | 1.64462900  |
| H | -0.38387700 | 3.44408100  | 2.06521900  |
| H | -0.69210600 | 1.70095300  | 1.95418300  |
| H | 0.96638500  | 2.29066900  | 2.06059500  |
| C | 0.30936000  | 1.21055300  | -0.56478500 |
| H | 0.31885800  | 1.37572200  | -1.64706300 |
| O | -0.69633200 | 0.27056500  | -0.24057000 |

|    |             |             |             |    |             |             |             |
|----|-------------|-------------|-------------|----|-------------|-------------|-------------|
| Fe | -2.68497200 | 0.59957300  | -0.05925900 | C  | 4.14072100  | 0.38284500  | -1.35593300 |
| Br | -2.05930700 | 3.08941600  | -0.44681100 | H  | 2.96199700  | 2.08415900  | -0.79719200 |
| Br | -1.73633000 | -2.42796300 | 1.51701400  | C  | 4.23228600  | -1.01082900 | -1.36583900 |
| Br | -3.45566100 | 0.01471200  | 2.24960200  | H  | 3.27483300  | -2.86557500 | -0.82885000 |
| Fe | -0.78510200 | -1.57280900 | -0.92969600 | H  | 4.92023500  | 0.98002200  | -1.81548800 |
| Br | -3.30096800 | -0.97805500 | -1.89330500 | C  | -0.46026100 | 2.31864300  | 2.04453500  |
| Br | 0.48798200  | -1.41336000 | -3.27298400 | H  | -0.32733300 | 3.28208300  | 2.53716600  |
| Br | 0.33841900  | -3.81570200 | -1.35520900 | H  | -1.22185800 | 2.38484100  | 1.26691100  |
| C  | 0.88586000  | 3.70426500  | -0.43922400 | H  | -0.83192700 | 1.60861000  | 2.79622700  |
| C  | 0.93216400  | 3.92941600  | -1.83031400 | C  | 0.79977500  | 0.88818600  | 0.41181600  |
| C  | 1.63264900  | 4.55196400  | 0.39702600  | H  | 0.85131500  | 2.08227600  | 0.01458500  |
| C  | 1.70890000  | 4.95270800  | -2.36194000 | O  | -0.40155700 | 0.40673000  | 0.02199100  |
| H  | 0.32558300  | 3.32734400  | -2.49894500 | Fe | -1.44034500 | 1.16613000  | -1.70147500 |
| C  | 2.41773500  | 5.57241500  | -0.13928600 | Br | 0.03869000  | 3.14480300  | -1.95381800 |
| H  | 1.62156500  | 4.41148000  | 1.47101900  | Br | -3.83357600 | -0.43164200 | 1.04575700  |
| C  | 2.45989200  | 5.77635100  | -1.51765500 | Br | -3.72607400 | 1.96059900  | -0.78595300 |
| H  | 1.72122900  | 5.11456900  | -3.43525200 | Fe | -1.44973400 | -1.23494400 | 0.40504600  |
| H  | 2.99451700  | 6.20815600  | 0.52523100  | Br | -1.80961700 | -1.20811200 | -2.37537100 |
| H  | 3.06601000  | 6.57541100  | -1.93348100 | Br | -1.07128700 | -3.75281500 | 0.70682600  |
| C  | 5.53915700  | -0.92223600 | 0.92649000  | Br | -0.40251000 | -1.67251200 | 2.86255200  |
| F  | 6.55628800  | -0.12403400 | 0.53385200  | C  | 5.45737200  | -1.68109500 | -1.93446700 |
| F  | 5.65923100  | -1.11112400 | 2.25880300  | F  | 5.16983500  | -2.89114300 | -2.45443500 |
| F  | 5.72602600  | -2.12290900 | 0.33772500  | F  | 6.02866900  | -0.93812700 | -2.90483800 |
|    |             |             |             | F  | 6.39412700  | -1.87151500 | -0.97664800 |
|    |             |             |             | C  | 2.08876400  | 2.17278000  | 2.20089100  |
|    |             |             |             | C  | 3.01920900  | 1.19542900  | 2.60449600  |
|    |             |             |             | C  | 2.32351500  | 3.52367800  | 2.52375200  |
|    |             |             |             | C  | 4.15135300  | 1.56542800  | 3.32447400  |
|    |             |             |             | H  | 2.83598700  | 0.15061900  | 2.38239500  |
|    |             |             |             | C  | 3.47770800  | 3.88953600  | 3.20909200  |
|    |             |             |             | H  | 1.61956700  | 4.28807700  | 2.20991000  |
|    |             |             |             | C  | 4.38823200  | 2.91068900  | 3.61724800  |

**TS4c**  
SCF done: -1321.251856

|   |            |             |             |
|---|------------|-------------|-------------|
| C | 0.83746500 | 1.76929000  | 1.53834900  |
| C | 2.01717200 | 0.23395400  | -0.19849400 |
| C | 2.10592100 | -1.16358900 | -0.23079100 |
| C | 3.03663300 | 1.00176500  | -0.77765100 |
| C | 3.21263600 | -1.78332800 | -0.80609500 |
| H | 1.32670200 | -1.77930700 | 0.20358900  |

|   |            |            |            |
|---|------------|------------|------------|
| H | 4.85046400 | 0.80337700 | 3.65350400 |
| H | 3.66309500 | 4.93520700 | 3.43268100 |
| H | 5.27985900 | 3.19647500 | 4.16705300 |

### IM3c

SCF done: -1321.294452

|   |             |             |             |
|---|-------------|-------------|-------------|
| C | 0.06967900  | 1.54022100  | -2.51107600 |
| C | 1.80811200  | 0.06468800  | -1.25101500 |
| C | 2.01832600  | -1.18034400 | -0.62391800 |
| C | 2.91718700  | 0.78995600  | -1.72975500 |
| C | 3.30479000  | -1.68429000 | -0.47323300 |
| H | 1.17015700  | -1.77159700 | -0.29510600 |
| C | 4.20194300  | 0.29235200  | -1.56029600 |
| H | 2.77894000  | 1.76022300  | -2.18985700 |
| C | 4.39590800  | -0.94432900 | -0.93474500 |
| H | 3.46034000  | -2.65074600 | -0.00824100 |
| H | 5.05652000  | 0.85713600  | -1.91548600 |
| C | -1.37798800 | 1.42669300  | -3.01592800 |
| H | -1.53804500 | 2.18211000  | -3.78940200 |
| H | -1.57322500 | 0.44408900  | -3.45353300 |
| H | -2.09726100 | 1.61232500  | -2.21555500 |
| C | 0.42589200  | 0.53849200  | -1.42245300 |
| H | 0.74951800  | 1.35087000  | -3.34734400 |
| O | -0.47018800 | 0.08933300  | -0.64966200 |

|    |             |             |             |
|----|-------------|-------------|-------------|
| Fe | -2.24973600 | -1.33602900 | -1.07741500 |
| Br | -1.82360300 | -2.45902400 | -3.14471000 |
| Br | -2.60025000 | 1.24324700  | 1.94329000  |
| Br | -4.20599200 | 0.15831100  | -0.36550200 |
| Fe | -0.44640400 | -0.13843400 | 1.56952500  |
| Br | -1.51887000 | -2.48553300 | 1.08326700  |
| Br | 1.21490900  | -1.02007700 | 3.34441200  |
| Br | 1.25028700  | 1.79430500  | 2.16568200  |
| C  | 5.80255300  | -1.45237100 | -0.71662400 |
| F  | 5.83686900  | -2.79479200 | -0.61588000 |
| F  | 6.61705900  | -1.09117400 | -1.73002400 |
| F  | 6.32393600  | -0.94426000 | 0.41815500  |
| C  | 0.36179700  | 2.95832800  | -1.99247200 |
| C  | -0.24199000 | 3.43945300  | -0.82302600 |
| C  | 1.18894700  | 3.81394500  | -2.73330700 |
| C  | -0.01594900 | 4.75091400  | -0.40101100 |
| H  | -0.89847600 | 2.80083400  | -0.24135000 |
| C  | 1.41009600  | 5.12591400  | -2.31237300 |
| H  | 1.64582200  | 3.45969700  | -3.65455700 |
| C  | 0.81173200  | 5.59582500  | -1.14176800 |
| H  | -0.48935500 | 5.10773600  | 0.50840000  |
| H  | 2.04591700  | 5.77986100  | -2.90178200 |
| H  | 0.98650400  | 6.61513900  | -0.81140000 |

**Cartesian Coordinates for the Stationary Points Given in Scheme 3.**

### IM1d

SCF done: -984.1360688

|   |            |             |             |
|---|------------|-------------|-------------|
| C | 2.41937600 | -1.03070900 | -0.38643500 |
| C | 3.52360800 | -0.61642700 | -1.36965300 |

|   |            |             |             |
|---|------------|-------------|-------------|
| C | 3.21300500 | 0.16078000  | -2.49341000 |
| C | 4.83257400 | -1.09321000 | -1.22012600 |
| C | 4.19264500 | 0.47484300  | -3.43754500 |
| H | 2.19656100 | 0.51602400  | -2.65324100 |
| C | 5.80905700 | -0.78810400 | -2.16741700 |



|    |             |             |             |
|----|-------------|-------------|-------------|
| H  | 5.08967400  | -1.69956000 | -0.35718000 |
| C  | 5.49415600  | 0.00137000  | -3.27596000 |
| H  | 3.93357200  | 1.08379900  | -4.29827700 |
| H  | 6.81869700  | -1.16636600 | -2.03734200 |
| H  | 6.25765000  | 0.24242800  | -4.00934800 |
| C  | 2.87965400  | -1.01612700 | 1.10110400  |
| C  | 2.38227400  | -1.95224000 | 2.02249600  |
| C  | 3.73027700  | 0.00486500  | 1.56570400  |
| C  | 2.76219800  | -1.89157300 | 3.36294700  |
| H  | 1.70319600  | -2.73568100 | 1.70851100  |
| C  | 4.09927700  | 0.06605200  | 2.90812400  |
| H  | 4.12347800  | 0.74032800  | 0.87141200  |
| C  | 3.61824800  | -0.88404700 | 3.81064600  |
| H  | 2.37832800  | -2.63203900 | 4.05772700  |
| H  | 4.76127700  | 0.85723000  | 3.24643000  |
| H  | 3.90471400  | -0.83681400 | 4.85687600  |
| C  | 1.81732600  | -2.37011700 | -0.84459900 |
| H  | 0.95909500  | -2.68550700 | -0.24959500 |
| H  | 1.49790800  | -2.29445700 | -1.88596900 |
| H  | 2.58099600  | -3.14870000 | -0.77734500 |
| C  | 1.41332400  | 0.08001300  | -0.26309600 |
| H  | 1.83146900  | 1.09162000  | -0.18152900 |
| O  | 0.17398600  | -0.03226300 | -0.16705100 |
| Fe | -1.61706500 | -1.45971400 | 0.08732100  |
| Br | -1.43754500 | -3.57158700 | 1.19996800  |
| Br | -2.93046700 | 0.46444300  | -1.37057600 |
| Br | -1.72426400 | -2.07279500 | -2.54916000 |
| Fe | -1.13356900 | 1.68188600  | 0.35334500  |
| Br | -2.06755400 | 0.26955900  | 2.19110600  |
| Br | 0.60242800  | 3.27671400  | 1.56413400  |
| Br | -0.75785400 | 3.69872600  | -1.15800700 |

### TS3d

SCF done: -984.0976504

|   |            |             |             |
|---|------------|-------------|-------------|
| C | 2.14414800 | -1.42933200 | -0.17503500 |
| C | 3.45873100 | -1.41992600 | -0.85896800 |
| C | 3.64061000 | -0.63475500 | -2.01304200 |
| C | 4.50970200 | -2.25100800 | -0.42652800 |
| C | 4.84334700 | -0.68678400 | -2.71772700 |
| H | 2.83090500 | -0.01573000 | -2.38553800 |
| C | 5.71322800 | -2.28362300 | -1.12123800 |
| H | 4.39305200 | -2.84798800 | 0.47237200  |
| C | 5.88135200 | -1.50460500 | -2.27147100 |
| H | 4.96381600 | -0.09044300 | -3.61645000 |
| H | 6.52138300 | -2.91731900 | -0.76960700 |
| H | 6.81888100 | -1.54003100 | -2.81791400 |
| C | 2.18015400 | -0.29980200 | 1.39854000  |
| C | 1.44586000 | -0.75082500 | 2.51303700  |
| C | 3.38675400 | 0.40311500  | 1.58740600  |
| C | 1.91267800 | -0.48302900 | 3.79559700  |
| H | 0.49807900 | -1.26355600 | 2.39276700  |
| C | 3.83966500 | 0.67006900  | 2.87216000  |
| H | 3.95801500 | 0.74115900  | 0.72909600  |
| C | 3.10526100 | 0.22318000  | 3.97712600  |
| H | 1.33563600 | -0.81532900 | 4.65225300  |
| H | 4.75876000 | 1.22875200  | 3.01566300  |
| H | 3.46189300 | 0.43126400  | 4.98141700  |
| C | 1.53311700 | -2.76838900 | 0.10713100  |
| H | 0.66397800 | -2.74153700 | 0.76126000  |
| H | 1.19438400 | -3.15522600 | -0.86310300 |
| H | 2.26607800 | -3.47454200 | 0.50209500  |
| C | 1.40146200 | -0.19263400 | -0.06640500 |

|    |             |             |             |
|----|-------------|-------------|-------------|
| H  | 1.86567500  | 0.66530200  | -0.55653300 |
| O  | 0.05974300  | -0.11157000 | -0.00923900 |
| Fe | -1.67040900 | -1.22574800 | 0.21011700  |
| Br | -1.97754600 | -2.98954000 | 1.83786100  |
| Br | -2.76529100 | 0.27278100  | -1.76803100 |
| Br | -1.49071800 | -2.47419400 | -2.21911500 |
| Fe | -0.92789200 | 1.69992300  | -0.06412100 |
| Br | -2.40046700 | 1.05924800  | 1.83848900  |
| Br | 0.82321100  | 3.46080400  | 0.91021900  |
| Br | 0.02712400  | 3.09402500  | -2.02294500 |

**IM2d**

SCF done: -984.1106204

|   |             |             |             |
|---|-------------|-------------|-------------|
| C | -1.87035600 | 1.44630100  | -0.83308000 |
| C | -3.18042300 | 1.23181700  | -1.39030700 |
| C | -3.75301700 | -0.07017100 | -1.42573700 |
| C | -3.91632400 | 2.30754700  | -1.95850300 |
| C | -4.99303400 | -0.27738700 | -2.01394000 |
| H | -3.20056300 | -0.92590900 | -1.05381400 |
| C | -5.16835600 | 2.09380400  | -2.51174700 |
| H | -3.52237500 | 3.31599300  | -1.91558800 |
| C | -5.70580300 | 0.80046600  | -2.54805100 |
| H | -5.40174300 | -1.28122000 | -2.06210200 |
| H | -5.72985900 | 2.92841900  | -2.91827700 |
| H | -6.68012900 | 0.63405400  | -2.99786400 |
| C | -1.86411900 | 1.33099800  | 1.50273300  |

|    |             |             |             |
|----|-------------|-------------|-------------|
| C  | -1.10435200 | 2.34707100  | 2.09959300  |
| C  | -3.10519700 | 0.97666600  | 2.05673800  |
| C  | -1.56781300 | 2.97124600  | 3.25744500  |
| H  | -0.13952800 | 2.63866400  | 1.69845200  |
| C  | -3.56526400 | 1.60706400  | 3.20878700  |
| H  | -3.69912800 | 0.19008500  | 1.59998800  |
| C  | -2.79708000 | 2.60833200  | 3.81107700  |
| H  | -0.96129900 | 3.74065600  | 3.72471400  |
| H  | -4.51518900 | 1.31071100  | 3.64279900  |
| H  | -3.15488500 | 3.10009400  | 4.71060500  |
| C  | -0.99551300 | 2.51860600  | -1.34328000 |
| H  | -0.36011100 | 2.97158100  | -0.57721200 |
| H  | -0.29639900 | 2.01692000  | -2.04042000 |
| H  | -1.51217200 | 3.29046700  | -1.91151600 |
| C  | -1.35314300 | 0.55549800  | 0.25747400  |
| H  | -1.89564600 | -0.39271000 | 0.25555600  |
| O  | 0.01610800  | 0.29272800  | 0.22196800  |
| Fe | 1.76826000  | 1.24791100  | 0.07494000  |
| Br | 2.29379300  | 3.56444000  | 0.59752900  |
| Br | 1.30335200  | -1.99863800 | -2.24833100 |
| Br | 2.23396900  | 0.85222300  | -2.52685500 |
| Fe | 0.67625200  | -1.66801200 | 0.25431700  |
| Br | 2.98821400  | -0.78710700 | 1.11730100  |
| Br | -0.14174100 | -2.75408400 | 2.50317600  |
| Br | -1.61982600 | -3.15238100 | -0.11444700 |

**Cartesian Coordinates for the Stationary Points Given in Fig. S1.**

SCF done: -1711.520047

**IM16a**

|   |            |            |             |
|---|------------|------------|-------------|
| C | 3.30571400 | 0.23264400 | -0.46441200 |
| C | 3.43928100 | 1.61338300 | -0.08314200 |

|    |             |             |             |   |             |             |             |
|----|-------------|-------------|-------------|---|-------------|-------------|-------------|
| C  | 2.48618200  | 2.26550800  | 0.75315400  | C | -2.79571400 | 2.21100800  | 2.86817200  |
| C  | 4.55158200  | 2.37879700  | -0.51767400 | H | -2.29317100 | 1.81364100  | 3.75201100  |
|    |             |             |             | H | -2.22425000 | 3.08507100  | 2.54715400  |
| C  | 2.65848200  | 3.57597200  | 1.14013700  | H | -3.79658100 | 2.53553300  | 3.16185300  |
| H  | 1.58789800  | 1.75495200  | 1.08230200  | C | -1.43685700 | 0.79904000  | 1.31682200  |
| C  | 4.73448100  | 3.69484200  | -0.13122600 | H | -1.37163300 | 0.02826600  | 0.52644600  |
| H  | 5.29675100  | 1.92917700  | -1.16296300 | O | -0.42237200 | 1.29744700  | 1.77456900  |
| C  | 3.78358800  | 4.30761800  | 0.70804800  | C | 3.01654500  | -1.07536400 | 1.72344900  |
| H  | 1.92856000  | 4.07200800  | 1.77024700  | C | 1.87157700  | -1.58814400 | 2.63967900  |
| H  | 5.60403600  | 4.23842300  | -0.47935400 | C | 4.14609600  | -2.11560800 | 1.67345700  |
| C  | 4.37453100  | -0.42241600 | -1.29377800 | H | 3.41715800  | -0.14476400 | 2.14650000  |
| H  | 5.29411400  | -0.47803900 | -0.69509400 | C | 2.38879400  | -2.46198600 | 3.80702500  |
| H  | 4.07814400  | -1.43453300 | -1.56088900 | H | 1.16874300  | -2.16852700 | 2.03394900  |
| H  | 4.59819100  | 0.13770400  | -2.20163200 | H | 1.31892700  | -0.72324300 | 3.02386400  |
| C  | 2.38907700  | -0.69280600 | 0.33004700  | C | 4.80383400  | -2.27423500 | 3.06753700  |
| H  | 1.47070900  | -0.14620700 | 0.57152100  | H | 3.71927700  | -3.06695100 | 1.33945000  |
| O  | 2.08838300  | -1.85895600 | -0.37659700 | H | 4.91614700  | -1.85526300 | 0.94146000  |
| Fe | 0.87066200  | -2.05239000 | -1.68293100 | C | 3.80472900  | -2.05132600 | 4.22673500  |
| Br | 0.13366700  | -2.94244000 | -3.75533800 | H | 2.39912700  | -3.51677600 | 3.50470700  |
| Br | -0.98152800 | -2.83085800 | -0.28091700 | H | 1.69596100  | -2.39467800 | 4.65297600  |
| Br | 1.49250700  | 0.28604600  | -2.51675500 | H | 5.64043300  | -1.57157800 | 3.16631600  |
| C  | -2.85699800 | 1.15614300  | 1.75480900  | H | 5.23829100  | -3.27828900 | 3.13724200  |
| C  | -3.54590100 | 1.67878500  | 0.47371000  | H | 3.79757700  | -0.99228700 | 4.51727100  |
| C  | -4.02085000 | 2.99039200  | 0.36308000  | H | 4.12640800  | -2.60764300 | 5.11409000  |
| C  | -3.68643000 | 0.85090400  | -0.66039000 | O | 3.85729700  | 5.57708900  | 1.14303600  |
| C  | -4.62636400 | 3.46583800  | -0.80428700 | C | 4.95519800  | 6.39471900  | 0.73644200  |
| H  | -3.93419000 | 3.67472100  | 1.19874800  | H | 4.79183900  | 7.36299100  | 1.20901300  |
| C  | -4.27735900 | 1.30913300  | -1.82956700 | H | 5.90826800  | 5.97692400  | 1.07942600  |
| H  | -3.32958500 | -0.17414500 | -0.64435900 | H | 4.97558200  | 6.51769000  | -0.35195600 |
| C  | -4.75721100 | 2.62378400  | -1.91207400 | C | -3.53917800 | -0.17913900 | 2.23928700  |
| H  | -4.98627100 | 4.48769600  | -0.83209900 | C | -2.70119300 | -0.95527700 | 3.29453600  |
| H  | -4.37597000 | 0.66263800  | -2.69532500 | C | -4.97716400 | 0.02670700  | 2.74615000  |

|   |             |             |             |
|---|-------------|-------------|-------------|
| H | -3.60702800 | -0.82410500 | 1.35567500  |
| C | -3.57285600 | -1.88806500 | 4.16698100  |
| H | -2.15606300 | -0.26389300 | 3.94683700  |
| H | -1.94118500 | -1.54996900 | 2.77346000  |
| C | -5.70187600 | -1.33114100 | 2.89876300  |
| H | -4.95057700 | 0.54099700  | 3.71486800  |
| H | -5.53659500 | 0.67640600  | 2.06510300  |
| C | -4.74790000 | -2.46015100 | 3.36375100  |
| H | -3.96639700 | -1.33266200 | 5.02855800  |
| H | -2.95443900 | -2.69327000 | 4.57896700  |
| H | -6.16197400 | -1.61172500 | 1.94407300  |
| H | -6.52459000 | -1.21550300 | 3.61455200  |
| H | -4.35133700 | -2.99853700 | 2.49364600  |
| H | -5.29728200 | -3.20097600 | 3.95526000  |
| O | -5.32738100 | 2.97844200  | -3.09953500 |
| C | -5.81897700 | 4.30099400  | -3.23836900 |
| H | -5.02150900 | 5.04536400  | -3.11472100 |
| H | -6.21904500 | 4.36981500  | -4.25118000 |
| H | -6.62092400 | 4.51400100  | -2.51929200 |

### TS18a

SCF done: -1711.474913

|   |             |             |             |
|---|-------------|-------------|-------------|
| C | -2.82022200 | 0.93363600  | 0.25966700  |
| C | -3.74048400 | -0.13227900 | -0.24950100 |
| C | -3.29332700 | -1.12194500 | -1.15149500 |
| C | -5.08223200 | -0.18770200 | 0.15157400  |
| C | -4.13646500 | -2.11864000 | -1.60757700 |
| H | -2.27680100 | -1.09015900 | -1.52650000 |
| C | -5.94398100 | -1.19434700 | -0.29081100 |
| H | -5.47947700 | 0.55346100  | 0.83496900  |
| C | -5.47442900 | -2.16873400 | -1.17752300 |
| H | -3.79055900 | -2.86939800 | -2.31017900 |

|    |             |             |             |
|----|-------------|-------------|-------------|
| H  | -6.97017000 | -1.20002500 | 0.05613200  |
| C  | -3.47844200 | 2.05693100  | 1.05943200  |
| H  | -3.85248700 | 1.65196500  | 2.00764500  |
| H  | -2.75961700 | 2.84333300  | 1.29169100  |
| H  | -4.31491000 | 2.49888900  | 0.51588700  |
| C  | -1.50396400 | 0.47760900  | 0.93678000  |
| H  | -0.69244100 | -0.35887300 | -0.00668900 |
| O  | -0.57767900 | 1.40782600  | 1.07897800  |
| Fe | -0.06325400 | 2.96010100  | -0.05082700 |
| Br | -0.52028200 | 5.19837600  | 0.73545800  |
| Br | 1.97248500  | 2.10333900  | -1.24121300 |
| Br | -2.14229400 | 2.01170800  | -1.55104200 |
| C  | 2.34668200  | -1.51911700 | -1.08278100 |
| C  | 3.73093700  | -1.08729900 | -0.56563600 |
| C  | 3.96209400  | -0.77574800 | 0.78746600  |
| C  | 4.83514900  | -1.03934300 | -1.42226900 |
| C  | 5.22055000  | -0.42207900 | 1.25341500  |
| H  | 3.15320700  | -0.80629000 | 1.51111100  |
| C  | 6.11118700  | -0.69094600 | -0.97194400 |
| H  | 4.72009600  | -1.26544600 | -2.47606700 |
| C  | 6.31140800  | -0.37370100 | 0.37455700  |
| H  | 5.38145000  | -0.17308500 | 2.29695900  |
| H  | 6.92920500  | -0.66133300 | -1.68156500 |
| C  | 2.19593100  | -1.28199200 | -2.61029900 |
| H  | 1.15212900  | -1.35784700 | -2.91547100 |
| H  | 2.55192000  | -0.28469700 | -2.87046500 |
| H  | 2.76726600  | -2.03041800 | -3.16590200 |
| C  | 1.26005700  | -0.74423100 | -0.38320000 |
| H  | 1.47334200  | -0.09765300 | 0.46803700  |
| O  | 0.05156400  | -0.93303600 | -0.68859900 |
| O  | -6.21899500 | -3.18601900 | -1.68155900 |
| C  | -7.59141100 | -3.26589900 | -1.31864100 |

|   |             |             |             |
|---|-------------|-------------|-------------|
| H | -8.14170700 | -2.36946500 | -1.62962400 |
| H | -7.99022700 | -4.13419200 | -1.84435400 |
| H | -7.71455900 | -3.40937700 | -0.23795600 |
| C | -1.70138100 | -0.43105700 | 2.19480700  |
| C | -2.18747500 | -1.88362600 | 1.91610400  |
| C | -0.44037600 | -0.46542800 | 3.07826500  |
| H | -2.47917000 | 0.06758900  | 2.79490000  |
| C | -1.81110600 | -2.86427900 | 3.05288700  |
| H | -1.76704900 | -2.25066100 | 0.97348600  |
| H | -3.27197900 | -1.88573500 | 1.78050800  |
| C | -0.76032300 | -1.05086800 | 4.47236200  |
| H | 0.32384500  | -1.08314600 | 2.58493300  |
| H | -0.01509000 | 0.53444800  | 3.17320300  |
| C | -1.82864500 | -2.16956500 | 4.41892300  |
| H | -0.80876200 | -3.27731800 | 2.87794800  |
| H | -2.49715200 | -3.71853100 | 3.03839500  |
| H | -1.10116400 | -0.24733200 | 5.13559700  |
| H | 0.16606100  | -1.43772400 | 4.91270400  |
| H | -2.82727200 | -1.74597300 | 4.58863500  |
| H | -1.66528300 | -2.89293600 | 5.22522100  |
| C | 2.15081600  | -3.08180800 | -0.78413300 |
| C | 2.21855100  | -3.45775200 | 0.72054000  |
| C | 0.91979500  | -3.75961900 | -1.41525800 |
| H | 3.03678900  | -3.50788900 | -1.27290000 |
| C | 1.69346400  | -4.88872500 | 1.00060700  |
| H | 1.62956800  | -2.75108100 | 1.32015200  |
| H | 3.25086700  | -3.36337000 | 1.06756200  |
| C | 1.10991300  | -5.29806400 | -1.42702700 |
| H | 0.02375000  | -3.49830300 | -0.84174000 |
| H | 0.74076900  | -3.41428400 | -2.43568900 |
| C | 1.90931900  | -5.80917400 | -0.20542100 |
| H | 0.62079000  | -4.85409300 | 1.23086300  |

|   |            |             |             |
|---|------------|-------------|-------------|
| H | 2.18348000 | -5.29165200 | 1.89344800  |
| H | 1.61957100 | -5.59810600 | -2.35023900 |
| H | 0.12237100 | -5.77299000 | -1.45320100 |
| H | 2.98056900 | -5.84301600 | -0.44241400 |
| H | 1.61946500 | -6.83772500 | 0.03483600  |
| O | 7.50451400 | -0.01564700 | 0.92466300  |
| C | 8.63162600 | 0.09993000  | 0.06906500  |
| H | 8.46823200 | 0.85104600  | -0.71391000 |
| H | 9.46004300 | 0.41692900  | 0.70411600  |
| H | 8.88433900 | -0.85981800 | -0.40014000 |

### IM7a

SCF done: -1711.538725

|    |             |             |             |
|----|-------------|-------------|-------------|
| C  | -4.38726000 | -1.20099100 | -0.37178800 |
| C  | -5.81339600 | -1.12009100 | -0.62298700 |
| C  | -6.52700100 | 0.10976500  | -0.62625500 |
| C  | -6.55802900 | -2.28323700 | -0.93431200 |
| C  | -7.87944200 | 0.16428900  | -0.90257200 |
| H  | -5.99328900 | 1.03807000  | -0.46225300 |
| C  | -7.92288200 | -2.24367200 | -1.19212600 |
| H  | -6.06195100 | -3.24760400 | -0.93561000 |
| C  | -8.59785700 | -1.01332800 | -1.17955200 |
| H  | -8.40977100 | 1.11040000  | -0.92669900 |
| H  | -8.44985500 | -3.16708600 | -1.40001500 |
| C  | -3.54747700 | -2.23084300 | -1.07504100 |
| H  | -2.78788100 | -1.72505100 | -1.68692400 |
| H  | -2.98613400 | -2.84919200 | -0.36565600 |
| H  | -4.13725900 | -2.86966500 | -1.73228300 |
| C  | -3.66680500 | -0.33907600 | 0.54414100  |
| O  | -2.40770700 | -0.40183700 | 0.53899700  |
| Fe | -0.52529200 | 0.13257000  | 0.02625500  |
| Br | -0.25129700 | -0.27464000 | -2.40869100 |

|    |             |             |             |   |              |             |             |
|----|-------------|-------------|-------------|---|--------------|-------------|-------------|
| Br | 0.09140600  | 2.34723100  | 0.95459600  | H | -2.82575200  | 1.94578300  | 3.85339500  |
| Br | 0.79906400  | -1.75235100 | 1.31050700  | H | -3.79435300  | 1.04577300  | 5.00777700  |
| C  | 4.40965400  | 0.22953500  | -0.28708700 | H | -5.82477100  | 3.15419300  | 1.86872700  |
| C  | 5.71757600  | -0.58721200 | -0.01315000 | H | -4.31223000  | 3.92307800  | 2.31751400  |
| C  | 5.69254700  | -1.63048700 | 0.92852900  | H | -5.88079600  | 1.78228500  | 3.77489600  |
| C  | 6.92811100  | -0.36460300 | -0.70165700 | H | -4.98979400  | 3.14040500  | 4.43636100  |
| C  | 6.82266100  | -2.39161600 | 1.21676300  | O | -9.92075000  | -0.85290100 | -1.42710200 |
| H  | 4.77593300  | -1.86293700 | 1.45988200  | C | -10.70257200 | -2.00106500 | -1.73535400 |
| C  | 8.06180800  | -1.11112700 | -0.42216400 | H | -10.70539400 | -2.71933700 | -0.90651000 |
| H  | 7.00367800  | 0.41682900  | -1.44759600 | H | -11.71697300 | -1.63606800 | -1.89929300 |
| C  | 8.02330800  | -2.13259300 | 0.54182800  | H | -10.34410100 | -2.49767700 | -2.64504500 |
| H  | 6.75384900  | -3.17870700 | 1.95758100  | C | 4.63264800   | 1.49741300  | -1.18181000 |
| H  | 8.99718200  | -0.92180000 | -0.93798500 | C | 3.30283800   | 2.01398600  | -1.80133300 |
| C  | 3.66785700  | 0.56288400  | 1.01611200  | C | 5.35658600   | 2.63825500  | -0.44626500 |
| H  | 2.77370200  | 1.16199300  | 0.83382900  | H | 5.27076300   | 1.19057200  | -2.02098800 |
| H  | 3.34534600  | -0.32143300 | 1.56505200  | C | 3.38681000   | 3.50629100  | -2.19820300 |
| H  | 4.33667500  | 1.13281900  | 1.66455200  | H | 2.46476900   | 1.88661700  | -1.11042400 |
| C  | 3.79720600  | -0.81695500 | -1.15076900 | H | 3.06071800   | 1.41072000  | -2.68585300 |
| H  | 4.25026400  | -0.95301200 | -2.13680100 | C | 5.80506100   | 3.72702700  | -1.44989200 |
| O  | 2.88420100  | -1.65243800 | -0.91200800 | H | 4.66998800   | 3.07256800  | 0.28835700  |
| H  | 2.28835200  | -1.57427800 | -0.05238200 | H | 6.21911500   | 2.26675400  | 0.11756300  |
| C  | -4.31596900 | 0.54855600  | 1.59418800  | C | 4.80766600   | 3.89728500  | -2.62315600 |
| C  | -3.78269100 | 0.18385500  | 3.01619100  | H | 3.07901200   | 4.12795800  | -1.34876700 |
| C  | -4.03910200 | 2.04325500  | 1.29671200  | H | 2.66826000   | 3.70972500  | -2.99826800 |
| H  | -5.39644500 | 0.38570900  | 1.57987800  | H | 6.79944400   | 3.48268900  | -1.84425500 |
| C  | -3.76824900 | 1.39727800  | 3.97022300  | H | 5.91558200   | 4.67435400  | -0.91020600 |
| H  | -2.77174000 | -0.22271000 | 2.92997100  | H | 5.11385900   | 3.26815100  | -3.46984700 |
| H  | -4.41631500 | -0.61010900 | 3.42994100  | H | 4.83229600   | 4.92894200  | -2.99021800 |
| C  | -4.82246900 | 2.95434500  | 2.26753300  | O | 9.18301300   | -2.80320000 | 0.73867400  |
| H  | -2.96250500 | 2.21789200  | 1.38786000  | C | 9.21034500   | -3.85230000 | 1.70141000  |
| H  | -4.29513600 | 2.29342000  | 0.25971500  | H | 8.51450400   | -4.65724700 | 1.43640200  |
| C  | -4.94088900 | 2.34406300  | 3.68554300  | H | 10.22981000  | -4.23867500 | 1.69173600  |

|                        |             |             |             |   |             |             |             |
|------------------------|-------------|-------------|-------------|---|-------------|-------------|-------------|
| H                      | 8.97222600  | -3.48062500 | 2.70516100  | C | -4.04480300 | 4.08280900  | -1.37689200 |
|                        |             |             |             | H | -3.05822300 | 4.61115500  | 0.42978700  |
| <b>TS19a</b>           |             |             |             | C | -4.42179000 | 3.05123100  | -2.24888000 |
| SCF done: -1711.495818 |             |             |             | H | -4.35371100 | 0.93590800  | -2.61751600 |
| C                      | 2.14799900  | 1.09303300  | -0.67660000 | H | -4.29437500 | 5.11497300  | -1.59156000 |
| C                      | 3.36242500  | 1.93886200  | -0.42601200 | C | -1.83371100 | 3.42999900  | 2.22172600  |
| C                      | 3.50272500  | 2.74453200  | 0.72020700  | H | -1.24152900 | 3.16166900  | 3.10075800  |
| C                      | 4.40088000  | 1.98226600  | -1.36696200 | H | -1.23831300 | 4.12005800  | 1.62142200  |
| C                      | 4.62764200  | 3.53400800  | 0.92520700  | H | -2.72889800 | 3.95013700  | 2.56400400  |
| H                      | 2.71510900  | 2.75827900  | 1.46911800  | C | -0.99403300 | 1.58034000  | 0.80210100  |
| C                      | 5.53705500  | 2.77250300  | -1.18076800 | H | -1.02615200 | 0.61763300  | 0.28896400  |
| H                      | 4.33588300  | 1.37180400  | -2.26299300 | O | 0.10813000  | 2.19813800  | 0.80043800  |
| C                      | 5.65649800  | 3.55532300  | -0.02633500 | C | 2.69068400  | -0.48963400 | 1.26851800  |
| H                      | 4.72883200  | 4.15076700  | 1.81236100  | C | 1.88252600  | -0.41626400 | 2.59563900  |
| H                      | 6.31695400  | 2.76339100  | -1.93318400 | C | 3.22210100  | -1.92666300 | 1.06450800  |
| C                      | 1.42657900  | 1.34575800  | -1.99499700 | H | 3.55718000  | 0.17159300  | 1.34565100  |
| H                      | 2.09247800  | 1.15397900  | -2.84412700 | C | 2.41734800  | -1.39203200 | 3.67069400  |
| H                      | 0.55799400  | 0.69571200  | -2.11003200 | H | 0.83250700  | -0.65081700 | 2.38790300  |
| H                      | 1.10260500  | 2.38990700  | -2.08046600 | H | 1.91801300  | 0.61360700  | 2.97466100  |
| C                      | 1.86529100  | -0.04051500 | 0.07377500  | C | 4.25312900  | -2.28308400 | 2.16055800  |
| H                      | 0.91548000  | 1.66842800  | 0.28560500  | H | 2.37850700  | -2.62567400 | 1.10417400  |
| O                      | 0.78256300  | -0.76209500 | -0.17006300 | H | 3.66938000  | -2.03974300 | 0.07191000  |
| Fe                     | 0.39119200  | -2.39527300 | -1.07047000 | C | 3.92732900  | -1.61540100 | 3.51865800  |
| Br                     | 1.89260600  | -3.45464500 | -2.63706100 | H | 1.90342500  | -2.35717000 | 3.58136900  |
| Br                     | -1.02948500 | -3.84298800 | 0.63358600  | H | 2.17892100  | -1.00981100 | 4.66978200  |
| Br                     | -2.17686200 | -2.21522300 | -1.71231700 | H | 5.25648200  | -1.98298700 | 1.83680200  |
| C                      | -2.21050100 | 2.15772600  | 1.43894600  | H | 4.27935200  | -3.37268700 | 2.27562200  |
| C                      | -3.00776900 | 2.46653700  | 0.13706200  | H | 4.43905500  | -0.64674700 | 3.59296800  |
| C                      | -3.37967600 | 1.44529500  | -0.76751800 | H | 4.31182400  | -2.22610300 | 4.34291000  |
| C                      | -3.33467300 | 3.78620300  | -0.21494100 | O | 6.71686600  | 4.36450500  | 0.26103300  |
| C                      | -4.07561200 | 1.72929100  | -1.93229300 | C | 7.78835000  | 4.42146400  | -0.66755600 |
| H                      | -3.12415100 | 0.40933500  | -0.58329100 | H | 7.45834800  | 4.79601600  | -1.64518400 |

|   |             |             |             |    |             |             |             |
|---|-------------|-------------|-------------|----|-------------|-------------|-------------|
| H | 8.51676500  | 5.11543100  | -0.24537600 | H  | 2.37888800  | 4.55172000  | 1.28926700  |
| H | 8.26146300  | 3.44017700  | -0.80165300 | C  | 5.16630700  | 2.94260000  | -0.87358900 |
| C | -2.89832500 | 1.13388700  | 2.43123500  | H  | 3.69000200  | 1.51533400  | -1.46719600 |
| C | -4.20421900 | 1.73780800  | 3.02089400  | C  | 5.44654700  | 4.07631700  | -0.09999500 |
| C | -3.17610900 | -0.29822100 | 1.93625600  | H  | 4.66150500  | 5.53011900  | 1.26890100  |
| H | -2.17022500 | 1.03949900  | 3.24995900  | H  | 5.93074900  | 2.47388300  | -1.48131500 |
| C | -5.14837000 | 0.65933400  | 3.60106100  | C  | 0.77134700  | 2.42370300  | -1.47491000 |
| H | -4.73131200 | 2.30280700  | 2.24282800  | H  | 1.34268000  | 1.87542200  | -2.22752000 |
| H | -3.94706600 | 2.45262000  | 3.80996000  | H  | -0.23198000 | 1.99588500  | -1.42287500 |
| C | -3.50788200 | -1.21696200 | 3.13583000  | H  | 0.69604100  | 3.46577700  | -1.79682000 |
| H | -4.02108400 | -0.28923200 | 1.24081200  | C  | 1.56979300  | 0.95383700  | 0.44609500  |
| H | -2.33327100 | -0.73460500 | 1.39208900  | H  | 0.84208100  | 2.91263700  | 0.62914400  |
| C | -4.35167900 | -0.49770500 | 4.21659200  | O  | 1.43711900  | -0.01297600 | -0.32611400 |
| H | -5.79971700 | 0.26727100  | 2.81040800  | Fe | 1.92719500  | -1.80238400 | -1.03189600 |
| H | -5.81171100 | 1.11803000  | 4.34248100  | Br | 4.08412800  | -1.82649400 | -2.08766400 |
| H | -2.57780500 | -1.59342000 | 3.57639000  | Br | 1.10599200  | -3.72072100 | 0.50688600  |
| H | -4.04085000 | -2.09502900 | 2.75743500  | Br | -0.23473200 | -2.74676600 | -2.10753200 |
| H | -3.69851900 | -0.09903700 | 5.00429700  | C  | -3.85662700 | 0.72929700  | 1.06803600  |
| H | -5.02164700 | -1.20881100 | 4.71122400  | C  | -4.89116600 | 1.50436400  | 0.22903500  |
| O | -5.10384900 | 3.22652500  | -3.40589700 | C  | -4.50447000 | 2.53135900  | -0.64937300 |
| C | -5.45999000 | 4.54712400  | -3.79739900 | C  | -6.26445100 | 1.28187200  | 0.38460700  |
| H | -5.98312600 | 4.44502000  | -4.74854600 | C  | -5.43904900 | 3.27879700  | -1.35669500 |
| H | -6.12814400 | 5.01712300  | -3.06537500 | H  | -3.45263600 | 2.77006800  | -0.78210300 |
| H | -4.57299200 | 5.17687700  | -3.93735600 | C  | -7.21930400 | 2.02608600  | -0.31143000 |

### IM18a

SCF done: -1711.538643

|   |            |            |             |   |             |            |             |
|---|------------|------------|-------------|---|-------------|------------|-------------|
| C | 1.44685500 | 2.36140600 | -0.10059300 | H | -8.27061100 | 1.81431300 | -0.15605500 |
| C | 2.85656500 | 2.96140800 | -0.09129600 | C | -3.78299600 | 1.37986000 | 2.46594300  |
| C | 3.15656900 | 4.09329000 | 0.68335100  | H | -3.02357100 | 0.91263800 | 3.09712300  |
| C | 3.88074900 | 2.39779900 | -0.86216900 | H | -3.53245800 | 2.43973300 | 2.37854300  |
| C | 4.42892000 | 4.64976500 | 0.67882600  | H | -4.75234600 | 1.29887800 | 2.96607800  |



|   |             |             |             |
|---|-------------|-------------|-------------|
| C | -2.49942200 | 0.83406100  | 0.38351100  |
| H | -2.42962500 | 0.34929000  | -0.61101300 |
| O | -1.52496400 | 1.39423300  | 0.85258900  |
| C | 1.91810100  | 0.74276700  | 1.89818300  |
| C | 0.78412400  | -0.02904600 | 2.64369800  |
| C | 3.26007900  | -0.01499400 | 2.05691200  |
| H | 2.03536000  | 1.73437400  | 2.34778600  |
| C | 1.31046300  | -0.74701700 | 3.90871900  |
| H | 0.34075700  | -0.76422600 | 1.96607200  |
| H | -0.00765200 | 0.68123400  | 2.89722800  |
| C | 3.70756900  | -0.00526800 | 3.53674900  |
| H | 3.12011500  | -1.04518800 | 1.70974200  |
| H | 4.03330800  | 0.42975000  | 1.42401900  |
| C | 2.51250100  | -0.01565300 | 4.51881600  |
| H | 1.60577000  | -1.77266000 | 3.65548600  |
| H | 0.49827900  | -0.83467100 | 4.63845800  |
| H | 4.33302900  | 0.87435600  | 3.72643100  |
| H | 4.34309900  | -0.88066200 | 3.71163200  |
| H | 2.21932900  | 1.01362900  | 4.76454000  |
| H | 2.80747900  | -0.48085500 | 5.46526900  |
| O | 6.65940800  | 4.68991500  | -0.03460400 |
| C | 7.73022000  | 4.14978000  | -0.79745400 |
| H | 7.50891200  | 4.16678900  | -1.87188600 |
| H | 8.59222200  | 4.78756700  | -0.59766500 |
| H | 7.96287300  | 3.12133900  | -0.49442300 |
| C | -4.20541700 | -0.80722300 | 1.17264500  |
| C | -4.61173100 | -1.46548100 | -0.18029100 |
| C | -3.08916800 | -1.64468300 | 1.83390900  |
| H | -5.07197300 | -0.85979200 | 1.84615900  |
| C | -4.36611000 | -2.99169700 | -0.20201100 |
| H | -4.07206700 | -1.00420700 | -1.01471100 |
| H | -5.67023400 | -1.26319600 | -0.37050300 |

|   |             |             |             |
|---|-------------|-------------|-------------|
| C | -3.60162200 | -3.05284300 | 2.21304000  |
| H | -2.24612600 | -1.74073300 | 1.13737200  |
| H | -2.69281000 | -1.15019800 | 2.72573600  |
| C | -4.61069900 | -3.60935500 | 1.17951600  |
| H | -3.33602200 | -3.20332000 | -0.51400200 |
| H | -5.01283500 | -3.45437600 | -0.95574800 |
| H | -4.06916600 | -3.01971600 | 3.20477900  |
| H | -2.74167200 | -3.72644100 | 2.29897400  |
| H | -5.63734500 | -3.37940700 | 1.49499700  |
| H | -4.54371200 | -4.70162700 | 1.13433200  |
| O | -7.64791400 | 3.81217300  | -1.93287600 |
| C | -9.04550200 | 3.59996800  | -1.80915100 |
| H | -9.51983800 | 4.31798200  | -2.47978200 |
| H | -9.32944800 | 2.58344200  | -2.11058800 |
| H | -9.39414200 | 3.78028300  | -0.78401900 |

### TS20a

SCF done: -1178.743904

|    |             |             |             |
|----|-------------|-------------|-------------|
| C  | -1.85476200 | -0.44049200 | -0.79021600 |
| C  | -1.31583700 | -0.02604500 | -2.15923800 |
| H  | -1.57608000 | 1.01637300  | -2.36690200 |
| H  | -0.23147400 | -0.10767300 | -2.19202200 |
| H  | -1.73530800 | -0.65633700 | -2.94442700 |
| C  | -1.08091000 | 0.26253500  | 0.36980000  |
| H  | -1.27359700 | -0.46337800 | 1.41046800  |
| O  | 0.25644500  | 0.20533900  | 0.24394100  |
| Fe | 1.92809700  | 1.58939800  | -0.06188000 |
| Br | 1.91053000  | 3.98712100  | -0.23383700 |
| Br | 2.72666900  | -2.23945100 | -1.74334400 |
| Br | 2.60206200  | 0.70069600  | -2.44594700 |
| Fe | 1.40666200  | -1.56797400 | 0.32619200  |
| Br | 3.19853800  | 0.09170000  | 1.51301200  |

|    |             |             |             |
|----|-------------|-------------|-------------|
| Br | 1.14183100  | -3.11591000 | 2.30160200  |
| Br | -1.16198500 | -2.50431400 | -0.64729400 |
| O  | -1.38687200 | -1.19607000 | 2.61181300  |
| H  | -0.72434400 | -1.94545400 | 2.54268300  |
| H  | -1.03893000 | -0.62126200 | 3.31424000  |
| C  | -1.69445400 | 1.57231100  | 0.94404400  |
| C  | -0.94967900 | 2.04736100  | 2.22418900  |
| C  | -1.80843100 | 2.72458800  | -0.08942200 |
| H  | -2.72061900 | 1.30765000  | 1.21844900  |
| C  | -1.06163400 | 3.56821200  | 2.45906900  |
| H  | 0.10757500  | 1.76317600  | 2.18212900  |
| H  | -1.38393500 | 1.52835000  | 3.09031200  |
| C  | -2.62424600 | 3.90392700  | 0.49682100  |
| H  | -0.80575300 | 3.05962500  | -0.37099500 |
| H  | -2.30267300 | 2.37465200  | -0.99779600 |
| C  | -2.43441000 | 4.08515300  | 2.02006900  |
| H  | -0.27760300 | 4.08588300  | 1.89590500  |
| H  | -0.87906800 | 3.78370100  | 3.51701600  |
| H  | -3.68715500 | 3.76121400  | 0.27113200  |
| H  | -2.31245400 | 4.81410700  | -0.02776400 |
| H  | -3.21734500 | 3.54001700  | 2.56466000  |
| H  | -2.55406600 | 5.13924300  | 2.29036100  |
| C  | -3.34432500 | -0.46591900 | -0.64950000 |
| C  | -3.97691900 | -0.92897100 | 0.52750200  |
| C  | -4.17249900 | -0.02306300 | -1.69295700 |
| C  | -5.35332700 | -0.93092600 | 0.65279400  |
| H  | -3.38463200 | -1.31522000 | 1.34948700  |
| C  | -5.56269600 | -0.01456900 | -1.57908700 |
| H  | -3.74186300 | 0.33327800  | -2.62070500 |
| C  | -6.16557100 | -0.47012900 | -0.40084000 |
| H  | -5.83366400 | -1.29446900 | 1.55486600  |
| H  | -6.15743200 | 0.34299400  | -2.41059700 |

|   |             |             |             |
|---|-------------|-------------|-------------|
| O | -7.49887700 | -0.51120600 | -0.17661400 |
| C | -8.38081200 | -0.07638700 | -1.20734000 |
| H | -8.26672300 | -0.68361000 | -2.11300900 |
| H | -9.38811500 | -0.20435800 | -0.81064800 |
| H | -8.21855700 | 0.97993600  | -1.45297000 |

### IM19a

SCF done: -1178.798284

|    |             |             |             |
|----|-------------|-------------|-------------|
| C  | -1.81360100 | 0.44071600  | 0.80746600  |
| C  | -3.09037600 | 1.06293200  | 0.55852900  |
| C  | -3.63864900 | 1.13245300  | -0.75417500 |
| C  | -3.82322500 | 1.69985200  | 1.59322200  |
| C  | -4.82893000 | 1.77722000  | -1.00848800 |
| H  | -3.07883800 | 0.71544200  | -1.58184800 |
| C  | -5.03546400 | 2.32679600  | 1.35462200  |
| H  | -3.46014600 | 1.65745300  | 2.61344700  |
| C  | -5.55022700 | 2.37706200  | 0.04555800  |
| H  | -5.22741300 | 1.85169600  | -2.01439500 |
| H  | -5.57509300 | 2.77113800  | 2.18181300  |
| C  | -0.90715400 | 0.98708300  | 1.87977100  |
| H  | -0.36065500 | 0.19305800  | 2.39301100  |
| H  | -0.16880000 | 1.66628800  | 1.43122800  |
| H  | -1.45444500 | 1.58055800  | 2.61180500  |
| C  | -1.29777200 | -0.66929100 | 0.05697600  |
| H  | 3.02040500  | 3.74480000  | 0.42092000  |
| O  | -0.00322600 | -0.80938100 | 0.02951700  |
| Fe | 1.11615700  | -2.43399200 | 0.94919000  |
| Br | 1.62957300  | -3.86244600 | -1.01862700 |
| Br | 2.61612100  | 4.40578200  | 1.65164200  |
| Br | -0.11298200 | -2.93477900 | 2.96823800  |
| Fe | 1.55031400  | 0.38787800  | -0.77239000 |
| Br | 2.97311500  | -0.53734700 | 1.13250700  |

|    |             |             |             |
|----|-------------|-------------|-------------|
| Br | 3.25359100  | 2.17888600  | -1.80938500 |
| Br | 0.19732600  | 2.43224900  | -1.65536500 |
| O  | 1.77406800  | -0.89247400 | -2.39114000 |
| H  | 2.56103500  | -0.73964500 | -2.93392000 |
| H  | 1.76073700  | -1.84974100 | -2.14059600 |
| O  | -6.70595500 | 2.97084300  | -0.30239300 |
| C  | -7.48905500 | 3.61821800  | 0.70160600  |
| H  | -8.35724600 | 4.02280500  | 0.18202900  |
| H  | -7.81955800 | 2.90613100  | 1.46589900  |
| H  | -6.93115200 | 4.43477900  | 1.17286900  |
| C  | -2.06439200 | -1.82191600 | -0.57103400 |
| C  | -3.46864500 | -2.15702100 | -0.00393700 |
| C  | -2.07016000 | -1.79342400 | -2.12596600 |
| H  | -1.41298100 | -2.67029100 | -0.32172900 |
| C  | -4.27952300 | -3.03365300 | -0.98567600 |
| H  | -4.03885500 | -1.25536900 | 0.22481400  |
| H  | -3.32881300 | -2.68719800 | 0.94479600  |
| C  | -2.37985200 | -3.20767800 | -2.67054600 |
| H  | -2.82868400 | -1.08622100 | -2.47814000 |
| H  | -1.10528700 | -1.44498800 | -2.50586400 |
| C  | -3.37056500 | -3.98819300 | -1.77097100 |
| H  | -4.82354900 | -2.39326700 | -1.69246900 |
| H  | -5.04093600 | -3.59128000 | -0.43012000 |
| H  | -1.44585900 | -3.77191500 | -2.76183700 |
| H  | -2.78782400 | -3.10596400 | -3.68277000 |
| H  | -2.81558700 | -4.61503900 | -1.06162900 |
| H  | -3.96831900 | -4.67518300 | -2.37904000 |

### TS21a

SCF done: -1102.294043

|   |             |            |             |
|---|-------------|------------|-------------|
| C | -1.81251200 | 0.17536300 | -1.33221700 |
| C | -3.21165100 | 0.01813000 | -1.01115200 |

|    |             |             |             |
|----|-------------|-------------|-------------|
| C  | -3.62160100 | -0.26711100 | 0.32534300  |
| C  | -4.21625700 | 0.01936300  | -2.01400000 |
| C  | -4.94394600 | -0.48518500 | 0.63756100  |
| H  | -2.87295200 | -0.37688400 | 1.10356700  |
| C  | -5.55054600 | -0.18960700 | -1.70712600 |
| H  | -3.94657500 | 0.21874300  | -3.04496700 |
| C  | -5.93000600 | -0.44192900 | -0.37328600 |
| H  | -5.25222300 | -0.72014900 | 1.65042300  |
| H  | -6.29034700 | -0.15587100 | -2.49751400 |
| C  | -1.34132100 | 0.24805100  | -2.78204100 |
| H  | -1.57406100 | 1.22862400  | -3.21775800 |
| H  | -0.26056100 | 0.10530500  | -2.83867200 |
| H  | -1.82046100 | -0.52160100 | -3.39179300 |
| C  | -0.85550900 | 0.84870200  | -0.41132900 |
| H  | -1.40525600 | -1.38202800 | -1.14569600 |
| O  | 0.31279200  | 0.36844400  | -0.31902700 |
| Fe | 2.33272500  | 1.35148900  | -0.22635700 |
| Br | 2.18229900  | 3.61876200  | -1.02319200 |
| Br | 2.89124200  | -2.79397000 | -0.34418000 |
| Br | 3.40614500  | -0.28920600 | -1.94131100 |
| Fe | 0.94482500  | -1.55339500 | 0.84236400  |
| Br | 2.65705700  | 0.23692100  | 1.99708300  |
| Br | -0.63733600 | -1.86637300 | 2.64721700  |
| Br | -0.82545000 | -2.84834300 | -1.08397700 |
| O  | -7.19093500 | -0.66628000 | 0.03416100  |
| C  | -8.24793400 | -0.68015500 | -0.92694000 |
| H  | -9.15560600 | -0.89100800 | -0.36226000 |
| H  | -8.34337800 | 0.29178000  | -1.42349500 |
| H  | -8.09106100 | -1.46511800 | -1.67477400 |
| C  | -1.13857200 | 2.16267800  | 0.28874300  |
| C  | -2.16527200 | 3.10678600  | -0.38928900 |
| C  | -1.45719200 | 1.99726200  | 1.80669500  |

|   |             |            |             |
|---|-------------|------------|-------------|
| H | -0.16090400 | 2.65883500 | 0.25287800  |
| C | -2.68965600 | 4.17565800 | 0.59831300  |
| H | -3.01068700 | 2.54490600 | -0.79516400 |
| H | -1.66985500 | 3.59702200 | -1.23538100 |
| C | -1.24326000 | 3.35331500 | 2.51835600  |
| H | -2.49666600 | 1.67464000 | 1.91677600  |
| H | -0.82990300 | 1.22483000 | 2.25821200  |
| C | -1.61822200 | 4.56209800 | 1.62692900  |
| H | -3.57291700 | 3.79238800 | 1.12517600  |
| H | -3.02447400 | 5.05354500 | 0.03602400  |
| H | -0.19830000 | 3.43650800 | 2.83537600  |
| H | -1.84826400 | 3.35393900 | 3.43210400  |
| H | -0.72940400 | 4.92640700 | 1.09669000  |
| H | -1.96503400 | 5.39419800 | 2.24822100  |

### TS22a

SCF done: -1178.735162

|   |             |             |             |
|---|-------------|-------------|-------------|
| C | -1.34437600 | -1.50923200 | -0.99106600 |
| C | -2.17587700 | 0.61544700  | 0.44959800  |
| C | -3.52584600 | 0.62800900  | 0.02540600  |
| C | -1.77853800 | 1.62213800  | 1.37211600  |
| C | -4.40306400 | 1.60472200  | 0.44940000  |
| H | -3.87466500 | -0.10771700 | -0.68013300 |
| C | -2.65338600 | 2.59949700  | 1.81396700  |
| H | -0.75469500 | 1.63758700  | 1.73233900  |
| C | -3.98074900 | 2.60903400  | 1.34517400  |
| H | -5.42571700 | 1.63355600  | 0.08924800  |
| H | -2.29763600 | 3.35524400  | 2.50331100  |
| C | -0.88587800 | -1.02072700 | -2.35983400 |
| H | -1.56114000 | -0.22361900 | -2.69488600 |
| H | 0.12212400  | -0.61096900 | -2.32697400 |
| H | -0.91027700 | -1.83152100 | -3.09142300 |

|    |             |             |             |
|----|-------------|-------------|-------------|
| C  | -1.16435800 | -0.39716500 | 0.07908000  |
| H  | -1.27089000 | -1.03068400 | 1.31501500  |
| O  | 0.11344900  | 0.08560000  | 0.11696700  |
| Fe | 0.90172900  | 1.95264800  | -0.69317500 |
| Br | -0.74487900 | 3.29401400  | -1.83253800 |
| Br | 3.82703700  | -1.08965400 | -0.66649200 |
| Br | 2.63981100  | 1.05325700  | -2.43056700 |
| Fe | 1.77863300  | -0.71488200 | 0.86675400  |
| Br | 2.25384500  | 1.96692800  | 1.45237200  |
| Br | 1.85261600  | -1.84633600 | 3.09623200  |
| Br | 0.22907200  | -2.88867800 | -0.38626700 |
| O  | -1.25348800 | -1.50968000 | 2.50130000  |
| H  | -0.31737000 | -1.79657800 | 2.72947500  |
| H  | -1.45597600 | -0.77290800 | 3.10176400  |
| O  | -4.91192500 | 3.51404400  | 1.69118000  |
| C  | -4.54376900 | 4.60654800  | 2.53697500  |
| H  | -5.44150000 | 5.21594300  | 2.63659600  |
| H  | -4.23081600 | 4.25337600  | 3.52582800  |
| H  | -3.74347100 | 5.20122200  | 2.08416100  |
| C  | -2.58095900 | -2.45763700 | -1.06889900 |
| C  | -3.23134600 | -2.85433700 | 0.27897100  |
| C  | -3.68596500 | -2.12601600 | -2.11112000 |
| H  | -2.13657000 | -3.36952200 | -1.48038100 |
| C  | -4.58537300 | -3.57756800 | 0.07059100  |
| H  | -3.39648000 | -1.97515000 | 0.90850300  |
| H  | -2.54055300 | -3.50268400 | 0.82698700  |
| C  | -4.44395300 | -3.43110700 | -2.46124100 |
| H  | -4.40772900 | -1.40392500 | -1.71898200 |
| H  | -3.27407600 | -1.68797500 | -3.02242000 |
| C  | -4.60316000 | -4.37276000 | -1.24080300 |
| H  | -5.40056400 | -2.84260300 | 0.05191900  |
| H  | -4.78631700 | -4.23176700 | 0.92524900  |

|   |             |             |             |
|---|-------------|-------------|-------------|
| H | -3.91556000 | -3.95633300 | -3.26524500 |
| H | -5.42783400 | -3.16341300 | -2.86234500 |
| H | -3.78925800 | -5.10835000 | -1.22354000 |
| H | -5.52969300 | -4.94947900 | -1.32850900 |

### IM20a

SCF done: -1178.794842

|    |             |             |             |
|----|-------------|-------------|-------------|
| C  | -1.66640600 | 1.03712100  | 0.64704200  |
| C  | -1.67827800 | -0.38909300 | -1.49823100 |
| C  | -2.53216800 | 0.42417900  | -2.28149300 |
| C  | -1.33607000 | -1.66527900 | -1.99379800 |
| C  | -3.02409700 | -0.02029300 | -3.49187200 |
| H  | -2.77088600 | 1.42820000  | -1.95199800 |
| C  | -1.84787600 | -2.13341500 | -3.19462000 |
| H  | -0.69225900 | -2.30855000 | -1.40503500 |
| C  | -2.69449900 | -1.30954400 | -3.95869900 |
| H  | -3.65783700 | 0.60590100  | -4.11010400 |
| H  | -1.59028500 | -3.13102900 | -3.52791200 |
| C  | -0.73877000 | 1.81031500  | 1.52882500  |
| H  | -0.57168700 | 1.24620500  | 2.45966500  |
| H  | 0.23593300  | 1.98696500  | 1.07201900  |
| H  | -1.18782000 | 2.76580900  | 1.81416700  |
| C  | -1.08220600 | 0.08206500  | -0.25562300 |
| H  | 4.94537900  | 3.34658200  | -0.66407600 |
| O  | 0.09731900  | -0.38899300 | 0.07177400  |
| Fe | 0.56236100  | -1.73589600 | 1.71445500  |
| Br | 0.97974800  | -3.83198700 | 0.42318000  |
| Br | 5.23479200  | 4.61877300  | -0.02175000 |
| Br | -0.95699500 | -1.43763900 | 3.57291700  |
| Fe | 2.02410100  | 0.07130500  | -0.67436100 |
| Br | 2.82370800  | -0.32430500 | 1.71269600  |
| Br | 4.25756900  | 0.98045100  | -1.84870000 |

|    |             |             |             |
|----|-------------|-------------|-------------|
| Br | 1.41743300  | 2.13430800  | -2.10913300 |
| O  | 2.18659300  | -1.70200000 | -1.72758400 |
| H  | 3.07726400  | -1.87979400 | -2.06351400 |
| H  | 1.89871700  | -2.48525300 | -1.19531300 |
| O  | -3.23685900 | -1.65583900 | -5.14128200 |
| C  | -2.94145100 | -2.93921700 | -5.69370800 |
| H  | -3.48125900 | -2.98391500 | -6.63936200 |
| H  | -1.86774500 | -3.05268700 | -5.87972900 |
| H  | -3.28911400 | -3.74366600 | -5.03604300 |
| C  | -3.13515800 | 1.21147500  | 0.94085900  |
| C  | -3.69139600 | 2.59670700  | 0.44371300  |
| C  | -4.10195900 | 0.06701100  | 0.58077100  |
| H  | -3.14692300 | 1.26929200  | 2.04039700  |
| C  | -5.23257300 | 2.58372900  | 0.35341500  |
| H  | -3.26414100 | 2.86369700  | -0.52882400 |
| H  | -3.36533500 | 3.37541000  | 1.14125100  |
| C  | -5.43223500 | 0.24937400  | 1.34797600  |
| H  | -4.29665400 | 0.04957300  | -0.49444600 |
| H  | -3.65554900 | -0.89965300 | 0.83419200  |
| C  | -5.84852000 | 1.73788700  | 1.47500300  |
| H  | -5.54535700 | 2.18052500  | -0.61787900 |
| H  | -5.60285100 | 3.61412600  | 0.39115500  |
| H  | -5.34355100 | -0.19358800 | 2.34602700  |
| H  | -6.21359200 | -0.31582200 | 0.82810800  |
| H  | -5.52043900 | 2.14020700  | 2.44209100  |
| H  | -6.93957700 | 1.82820500  | 1.46584200  |

### TS23a

SCF done: -1102.285818

|   |             |             |             |
|---|-------------|-------------|-------------|
| C | -1.52874500 | -1.41684700 | -1.31841900 |
| C | -2.08905300 | 0.85040600  | -0.12694600 |
| C | -3.29773700 | 1.16881000  | -0.79246800 |

|    |             |             |             |   |             |             |             |
|----|-------------|-------------|-------------|---|-------------|-------------|-------------|
| C  | -1.72064700 | 1.62174100  | 1.00097500  | O | -4.57957100 | 3.91669800  | 1.14985900  |
| C  | -4.09601600 | 2.20204800  | -0.35239800 | C | -4.26062400 | 4.74870000  | 2.26950000  |
| H  | -3.57470300 | 0.63797800  | -1.69384400 | H | -5.07763800 | 5.46580300  | 2.34296800  |
| C  | -2.53629600 | 2.63408400  | 1.47487300  | H | -4.20315300 | 4.16218200  | 3.19273700  |
| H  | -0.81166400 | 1.37905900  | 1.53964000  | H | -3.31725200 | 5.28027200  | 2.10731500  |
| C  | -3.72770700 | 2.94331600  | 0.79268000  | C | -2.84028500 | -2.18780300 | -1.24619900 |
| H  | -5.00563200 | 2.47824300  | -0.87389400 | C | -3.61653000 | -2.14491200 | 0.09744100  |
| H  | -2.24106800 | 3.17834100  | 2.36290300  | C | -3.80803100 | -1.95188300 | -2.44945400 |
| C  | -0.62828400 | -1.74421100 | -2.48965100 | H | -2.51173600 | -3.22860400 | -1.39046700 |
| H  | -0.91778500 | -1.12899200 | -3.35461600 | C | -5.08612900 | -2.59385500 | -0.07086900 |
| H  | 0.41738300  | -1.51433200 | -2.27854000 | H | -3.59179600 | -1.14596300 | 0.53586300  |
| H  | -0.72163500 | -2.79260800 | -2.78378800 | H | -3.10767200 | -2.80540100 | 0.80858600  |
| C  | -1.16332800 | -0.16218300 | -0.60423800 | C | -4.81567600 | -3.12058000 | -2.54398600 |
| H  | -0.75497400 | -2.36080900 | -0.24616800 | H | -4.34989000 | -1.01371300 | -2.30123900 |
| O  | 0.08953200  | 0.01680000  | -0.39374400 | H | -3.25337000 | -1.85432800 | -3.38714200 |
| Fe | 1.44119700  | 1.66252200  | -0.81893100 | C | -5.22352200 | -3.67032000 | -1.15460600 |
| Br | 0.27748000  | 3.59488500  | -1.63681400 | H | -5.71143900 | -1.73188200 | -0.33714800 |
| Br | 3.33522500  | -1.80488500 | -0.34768700 | H | -5.46579800 | -2.95895900 | 0.88876500  |
| Br | 3.04865600  | 0.40704900  | -2.39106700 | H | -4.38705400 | -3.92701300 | -3.14986000 |
| Fe | 1.47664100  | -0.95451000 | 1.24061300  | H | -5.70100600 | -2.76571400 | -3.08383800 |
| Br | 2.54807300  | 1.31570600  | 1.47431000  | H | -4.58928100 | -4.52585700 | -0.88891600 |
| Br | 0.30732100  | -0.78766200 | 3.36730100  | H | -6.24817100 | -4.05428700 | -1.18949400 |
| Br | 0.13506000  | -3.23105800 | 0.71253200  |   |             |             |             |

**Cartesian Coordinates for the Stationary Points Given in Fig. S2.**

**TS5b**

SCF done: -934.3023133

|   |            |            |            |    |             |             |             |
|---|------------|------------|------------|----|-------------|-------------|-------------|
| C | 1.60476000 | 0.98481300 | 0.64457900 | H  | 0.83274300  | -0.08105200 | 2.34129200  |
| C | 1.42358700 | 0.80495100 | 2.11824400 | H  | 2.36502800  | 0.80266500  | 2.67289800  |
| H | 0.85143800 | 1.67788700 | 2.46169300 | C  | 0.81153000  | 0.15621400  | -0.26591100 |
|   |            |            |            | O  | -0.27552500 | -0.46468400 | 0.22526400  |
|   |            |            |            | Fe | -2.00847400 | -0.25267900 | -0.52810800 |

|    |             |             |             |
|----|-------------|-------------|-------------|
| Br | -1.91884900 | 1.45153700  | -2.30533700 |
| Br | -3.31574200 | -2.49476400 | -0.78354300 |
| Br | -3.86751100 | -0.28345500 | 1.30458900  |
| H  | 0.71765600  | 0.55225000  | -1.28215200 |
| C  | 2.13782800  | -0.75418800 | -0.23660500 |
| C  | 3.20462900  | -0.57166500 | -1.14377500 |
| C  | 2.10991300  | -1.91376100 | 0.55871600  |
| C  | 4.19491500  | -1.52510400 | -1.26311600 |
| H  | 3.24708800  | 0.32180300  | -1.75869000 |
| C  | 3.10439000  | -2.87579500 | 0.45095500  |
| H  | 1.25716900  | -2.08252100 | 1.20628400  |
| C  | 4.15838200  | -2.68606800 | -0.46173500 |
| H  | 5.01112400  | -1.40981100 | -1.96785400 |
| H  | 3.04238900  | -3.77462200 | 1.05202900  |
| O  | 5.17178100  | -3.55282600 | -0.65019200 |
| C  | 5.20087400  | -4.76383400 | 0.10557900  |
| H  | 6.09609800  | -5.29306400 | -0.22029200 |
| H  | 5.26772200  | -4.55978500 | 1.18011200  |
| H  | 4.31787300  | -5.37944400 | -0.09856500 |
| C  | 2.40015300  | 2.11488400  | 0.14958800  |
| C  | 3.58820400  | 2.51482500  | 0.79621700  |
| C  | 1.92869600  | 2.87293400  | -0.94429100 |
| C  | 4.29498100  | 3.62451600  | 0.34985800  |
| H  | 3.97022100  | 1.93630600  | 1.63105900  |
| C  | 2.63303900  | 3.99723800  | -1.37225800 |
| H  | 0.98899200  | 2.61611200  | -1.42414600 |
| C  | 3.81728400  | 4.36957800  | -0.73467300 |
| H  | 5.21672500  | 3.91371600  | 0.84511500  |
| H  | 2.24939300  | 4.58387000  | -2.20091400 |
| H  | 4.36645100  | 5.24210400  | -1.07588500 |

### IM6b

SCF done: -1098.665795

|    |             |             |             |
|----|-------------|-------------|-------------|
| C  | -0.56790000 | -1.74436200 | -0.27235200 |
| C  | 0.37898300  | -2.81477500 | -0.81113200 |
| H  | 1.37610500  | -2.41293200 | -0.99065600 |
| H  | 0.45791800  | -3.65544600 | -0.11998300 |
| H  | -0.00216800 | -3.18351600 | -1.77039500 |
| C  | -0.61729300 | -0.52660900 | -1.26007800 |
| O  | 0.63017800  | 0.07727000  | -1.42367100 |
| Fe | 2.06175900  | 0.38867900  | -0.39506800 |
| Br | 4.08675000  | -0.85936200 | -0.82981200 |
| Br | 2.93694600  | 2.19253400  | 0.91414700  |
| Br | 0.44747900  | -1.01955600 | 1.46461000  |
| H  | -0.88906300 | -1.01626500 | -2.21136600 |
| C  | -1.65978400 | 0.55681100  | -1.02328600 |
| C  | -2.88367500 | 0.50710200  | -1.71382600 |
| C  | -1.42024400 | 1.64777600  | -0.17683900 |
| C  | -3.85357500 | 1.47841100  | -1.52597200 |
| H  | -3.08239000 | -0.31537200 | -2.39553500 |
| C  | -2.38402600 | 2.63387000  | 0.02329400  |
| H  | -0.47142100 | 1.74059300  | 0.33933200  |
| C  | -3.61232200 | 2.55225900  | -0.64998800 |
| H  | -4.80460500 | 1.43714700  | -2.04610000 |
| H  | -2.16500900 | 3.45991200  | 0.68886100  |
| O  | -4.61820000 | 3.45422100  | -0.53372600 |
| C  | -4.43319200 | 4.57671400  | 0.32177800  |
| H  | -5.35556100 | 5.15485200  | 0.25884100  |
| H  | -4.26935800 | 4.26598100  | 1.36069400  |
| H  | -3.59177400 | 5.19757800  | -0.00812600 |
| C  | -1.92499300 | -2.26069900 | 0.15507700  |
| C  | -2.40372400 | -3.48087500 | -0.35209700 |
| C  | -2.76321800 | -1.53107400 | 1.01761000  |

|   |             |             |             |
|---|-------------|-------------|-------------|
| C | -3.67601100 | -3.94862800 | -0.01790800 |
| H | -1.79124200 | -4.07938600 | -1.01550000 |
| C | -4.02704600 | -2.00348500 | 1.35824200  |
| H | -2.41506400 | -0.59639800 | 1.43983800  |
| C | -4.49226400 | -3.21404500 | 0.83949000  |
| H | -4.02058600 | -4.89408600 | -0.42618400 |
| H | -4.64854400 | -1.42483500 | 2.03495800  |
| H | -5.47818900 | -3.58229600 | 1.10715700  |

### TS6b

SCF done: -934.298136

|    |             |             |             |
|----|-------------|-------------|-------------|
| C  | -1.61176400 | -1.84070900 | -0.80549300 |
| C  | -0.76917200 | -3.06677500 | -0.78419600 |
| H  | -0.26793100 | -3.09291500 | 0.19764700  |
| H  | -1.33348300 | -3.98361800 | -0.94753700 |
| H  | 0.04260200  | -2.96834500 | -1.50840700 |
| C  | -0.90906400 | -0.59964700 | -1.14597700 |
| O  | 0.41565600  | -0.65171400 | -1.29661500 |
| Fe | 1.74816900  | -0.41727100 | 0.05919100  |
| Br | 4.11023000  | -1.03219400 | -0.82375000 |
| Br | 3.11658600  | 1.78562400  | -0.03503900 |
| Br | 0.88500500  | -1.30813200 | 2.18967900  |
| H  | -1.41051900 | -0.95504000 | -2.17401100 |
| C  | -1.47839700 | 0.75749800  | -0.80143300 |
| C  | -1.49249600 | 1.77479500  | -1.76878700 |
| C  | -1.87292900 | 1.05698500  | 0.50522900  |
| C  | -1.92043200 | 3.05315800  | -1.44355900 |
| H  | -1.15279400 | 1.56410300  | -2.77924500 |
| C  | -2.29337100 | 2.34352600  | 0.84660600  |
| H  | -1.82812700 | 0.29282700  | 1.27483900  |
| C  | -2.32379000 | 3.34775200  | -0.13002100 |
| H  | -1.93806400 | 3.84767300  | -2.18180100 |

|   |             |             |             |
|---|-------------|-------------|-------------|
| H | -2.57854500 | 2.55019800  | 1.87089000  |
| O | -2.72098300 | 4.62823200  | 0.08964300  |
| C | -3.07497000 | 5.01085200  | 1.41261400  |
| H | -3.32821100 | 6.07032800  | 1.35982300  |
| H | -3.94476900 | 4.44918100  | 1.77602400  |
| H | -2.23841200 | 4.87205400  | 2.10808600  |
| C | -3.05765300 | -1.94013300 | -0.59556200 |
| C | -3.99177900 | -1.02959400 | -1.13905200 |
| C | -3.53748400 | -2.99057400 | 0.21738200  |
| C | -5.34793200 | -1.17242800 | -0.87925100 |
| H | -3.65696300 | -0.22770700 | -1.78592800 |
| C | -4.89504700 | -3.10232400 | 0.50541500  |
| H | -2.84282700 | -3.69335800 | 0.66256800  |
| C | -5.80475300 | -2.20134300 | -0.04831200 |
| H | -6.05319900 | -0.47841700 | -1.32528500 |
| H | -5.24035400 | -3.90028700 | 1.15487000  |
| H | -6.86572300 | -2.30140500 | 0.15950300  |

### TS7b

SCF done: -934.2980945

|   |             |             |             |
|---|-------------|-------------|-------------|
| C | -1.29405400 | 0.88807300  | -0.88198300 |
| C | -2.53839100 | 0.14835700  | -0.62321900 |
| C | -2.54208800 | -0.94069800 | 0.26803400  |
| C | -3.73341200 | 0.44392900  | -1.31714900 |
| C | -3.68638600 | -1.70946700 | 0.46756500  |
| H | -1.62841800 | -1.23216300 | 0.77615500  |
| C | -4.87827200 | -0.30184100 | -1.11505900 |
| H | -3.76676200 | 1.28412100  | -2.00351000 |
| C | -4.86567100 | -1.39138800 | -0.22054600 |
| H | -3.64123300 | -2.55615800 | 1.14119400  |
| H | -5.80174200 | -0.07341900 | -1.63615200 |
| C | -1.20067000 | 2.50722000  | 0.18608900  |



|    |             |             |             |
|----|-------------|-------------|-------------|
| C  | -0.52598000 | 3.62536300  | -0.32642300 |
| C  | -2.29973100 | 2.67332500  | 1.04158300  |
| C  | -0.96200800 | 4.90393200  | 0.00947100  |
| H  | 0.36751200  | 3.48383800  | -0.92326200 |
| C  | -2.71749400 | 3.95494500  | 1.38743500  |
| H  | -2.82821900 | 1.80632600  | 1.42424200  |
| C  | -2.05722200 | 5.07057700  | 0.86252700  |
| H  | -0.43498100 | 5.77035800  | -0.37778200 |
| H  | -3.56028500 | 4.08464100  | 2.05920700  |
| H  | -2.39060300 | 6.06979800  | 1.12637100  |
| C  | -0.91561100 | 1.18652000  | -2.30548600 |
| H  | 0.00515900  | 1.76290500  | -2.36734200 |
| H  | -0.73076800 | 0.21621600  | -2.78263500 |
| H  | -1.71522500 | 1.68242800  | -2.86008600 |
| C  | -0.29746100 | 1.03992800  | 0.15128800  |
| H  | -0.52727200 | 0.58651000  | 1.12035600  |
| O  | 0.97381700  | 1.23203600  | -0.13894200 |
| Fe | 2.40102900  | -0.03600600 | -0.00140200 |
| Br | 4.72757900  | 0.54999400  | -0.15061700 |
| Br | 1.45025300  | -1.75227600 | 1.80459700  |
| Br | 1.44245000  | -2.17800000 | -1.24803900 |
| O  | -6.03184000 | -2.06334900 | -0.10386900 |
| C  | -6.09149900 | -3.18985700 | 0.76852600  |
| H  | -5.88214100 | -2.90281500 | 1.80557300  |
| H  | -7.11155700 | -3.56722700 | 0.69588500  |
| H  | -5.39022900 | -3.97237300 | 0.45687200  |

#### 4b

SCF done: -934.3085039

|   |             |             |             |
|---|-------------|-------------|-------------|
| C | -1.16002100 | 0.94546000  | -1.01094900 |
| C | -2.34945600 | 0.21681200  | -0.75370900 |
| C | -2.53167600 | -0.48432300 | 0.47684800  |

|    |             |             |             |
|----|-------------|-------------|-------------|
| C  | -3.38970100 | 0.09778200  | -1.73016400 |
| C  | -3.65776100 | -1.24407000 | 0.72159900  |
| H  | -1.73844500 | -0.49681200 | 1.21437000  |
| C  | -4.52363400 | -0.63365400 | -1.48447800 |
| H  | -3.30422400 | 0.61949900  | -2.67541000 |
| C  | -4.67132600 | -1.32250500 | -0.25531600 |
| H  | -3.73520700 | -1.79441900 | 1.65066800  |
| H  | -5.32217500 | -0.70946000 | -2.21406100 |
| C  | -0.62349600 | 2.88096600  | 0.29130900  |
| C  | 0.25648500  | 3.88334000  | -0.13175400 |
| C  | -1.83583500 | 3.23282400  | 0.90010700  |
| C  | -0.07001500 | 5.22514900  | 0.06790300  |
| H  | 1.20264100  | 3.58962900  | -0.57267800 |
| C  | -2.15927200 | 4.57498900  | 1.09642000  |
| H  | -2.52432400 | 2.45986000  | 1.23252300  |
| C  | -1.27811300 | 5.57434300  | 0.67628800  |
| H  | 0.62483800  | 5.99913800  | -0.24506200 |
| H  | -3.09568800 | 4.84037700  | 1.57860200  |
| H  | -1.52932700 | 6.61991600  | 0.82886100  |
| C  | -0.72271800 | 1.28509800  | -2.39104200 |
| H  | -0.00781100 | 2.10664100  | -2.38472600 |
| H  | -0.18671900 | 0.40214900  | -2.76905700 |
| H  | -1.54446500 | 1.48825200  | -3.07924500 |
| C  | -0.21989400 | 1.39638700  | 0.08730700  |
| H  | -0.43688700 | 0.87336600  | 1.02755800  |
| O  | 1.08966800  | 1.25497500  | -0.29654500 |
| Fe | 2.24106300  | -0.20520100 | -0.03456400 |
| Br | 4.64611000  | -0.16679700 | -0.20426700 |
| Br | 1.00166200  | -1.62599900 | 1.89986300  |
| Br | 0.89979200  | -2.28520800 | -1.10268400 |
| O  | -5.79871700 | -2.02432400 | -0.12372000 |
| C  | -6.03432100 | -2.77433700 | 1.07605100  |

|   |             |             |            |
|---|-------------|-------------|------------|
| H | -6.07201800 | -2.11397400 | 1.94811800 |
| H | -7.00286500 | -3.25175600 | 0.93405600 |
| H | -5.26276200 | -3.53779800 | 1.21582300 |

**TS8b**

SCF done: -934.2964041

|   |             |             |             |
|---|-------------|-------------|-------------|
| C | -1.50651600 | -0.65461200 | -0.90505600 |
| C | -2.89566700 | -0.61692500 | -0.45174500 |
| C | -3.34618000 | 0.16898600  | 0.64029800  |
| C | -3.85871400 | -1.38530800 | -1.13752400 |
| C | -4.67357100 | 0.17840300  | 1.01311500  |
| H | -2.64002400 | 0.74859700  | 1.22197400  |
| C | -5.20620900 | -1.35178700 | -0.79443000 |
| H | -3.56502700 | -1.99197000 | -1.98625500 |
| C | -5.62477600 | -0.57260400 | 0.29346200  |
| H | -5.01091100 | 0.75652300  | 1.86638900  |
| H | -5.91313900 | -1.93734100 | -1.36881100 |
| C | -0.90271500 | 1.80454800  | -0.30826400 |
| C | -1.75876300 | 2.52265800  | -1.15237000 |
| C | -0.30785200 | 2.44632500  | 0.78496900  |
| C | -2.02356500 | 3.86830800  | -0.89827600 |
| H | -2.21297300 | 2.03118500  | -2.00776200 |
| C | -0.58260000 | 3.78976900  | 1.04126900  |

|    |             |             |             |
|----|-------------|-------------|-------------|
| H  | 0.37087000  | 1.89786900  | 1.43204700  |
| C  | -1.44005800 | 4.50227000  | 0.20059700  |
| H  | -2.68180200 | 4.42196000  | -1.56125500 |
| H  | -0.11933600 | 4.27965400  | 1.89215900  |
| H  | -1.64774100 | 5.54983800  | 0.39730000  |
| C  | -0.97194100 | -1.85510200 | -1.62102700 |
| H  | -0.74025400 | -1.57513800 | -2.65701600 |
| H  | -0.01075300 | -2.14629300 | -1.18753300 |
| H  | -1.64885800 | -2.70652800 | -1.59369000 |
| C  | -0.52245600 | 0.38240400  | -0.65427200 |
| H  | -0.60111100 | -0.31510700 | 0.35620300  |
| O  | 0.68750100  | 0.23362200  | -1.18685900 |
| Fe | 2.39453000  | 0.02839800  | -0.35329300 |
| Br | 4.22887500  | 1.57025700  | -0.27231700 |
| Br | 1.41741600  | -1.15839200 | 1.87674500  |
| Br | 2.91365400  | -2.56892700 | -0.41807700 |
| O  | -6.89627000 | -0.48111100 | 0.73346600  |
| C  | -7.91242700 | -1.23204500 | 0.07179600  |
| H  | -8.83864000 | -1.00627700 | 0.60004600  |
| H  | -8.00936500 | -0.93176200 | -0.97796500 |
| H  | -7.71259300 | -2.30816700 | 0.12939800  |

**Cartesian Coordinates for the Stationary Points Given in Fig. S3.**

**TS9b**

SCF done: -1010.769433

|   |             |             |             |
|---|-------------|-------------|-------------|
| C | -0.88753600 | -0.25350400 | -0.87128400 |
| C | -2.26152300 | -0.68508000 | -0.45653900 |
| C | -2.56578400 | -0.97999700 | 0.89083000  |

|   |             |             |             |
|---|-------------|-------------|-------------|
| C | -3.29923600 | -0.79993600 | -1.39100600 |
| C | -3.84246500 | -1.34401900 | 1.27952800  |
| H | -1.78610800 | -0.94394700 | 1.64331100  |
| C | -4.59418400 | -1.16162000 | -1.01393900 |
| H | -3.11817500 | -0.59094500 | -2.43847300 |

|    |             |             |             |
|----|-------------|-------------|-------------|
| C  | -4.87543000 | -1.43597200 | 0.32858600  |
| H  | -4.06897400 | -1.57796800 | 2.31434100  |
| H  | -5.36518400 | -1.22671200 | -1.77197400 |
| C  | -0.65309900 | -0.11236600 | -2.37427500 |
| H  | -1.25618900 | 0.72304600  | -2.74836800 |
| H  | 0.39464300  | 0.11172500  | -2.57594800 |
| H  | -0.92873300 | -1.02143700 | -2.91087500 |
| C  | -0.26554400 | 0.97473300  | -0.14499300 |
| H  | -0.31178900 | 0.80646900  | 1.26785900  |
| O  | 1.04337900  | 1.10386300  | -0.26248900 |
| Fe | 2.54781300  | -0.12229000 | -0.07270400 |
| Br | 0.42805000  | -1.90863200 | -0.31920600 |
| Br | 4.28878200  | -0.61444000 | -1.64544900 |
| Br | 2.86987500  | -0.05732500 | 2.46538200  |
| O  | -0.15055300 | 0.73460100  | 2.48417000  |
| H  | -0.17963200 | 1.64560800  | 2.82240500  |
| H  | 0.81189700  | 0.41730100  | 2.60368800  |
| O  | -6.08994000 | -1.79774300 | 0.81084700  |
| C  | -7.17094000 | -1.93727700 | -0.10362200 |
| H  | -6.96282700 | -2.70774500 | -0.85583300 |
| H  | -8.03112400 | -2.23970000 | 0.49436000  |
| H  | -7.39540600 | -0.98923200 | -0.60783500 |
| C  | -0.97189800 | 4.64336800  | -0.82464700 |
| C  | -0.33671600 | 3.40795900  | -0.73436500 |
| C  | -1.02864800 | 2.27688400  | -0.25681100 |
| C  | -2.36798500 | 2.43001200  | 0.15168400  |
| C  | -2.99567900 | 3.67192700  | 0.06223900  |
| C  | -2.30472400 | 4.78167800  | -0.42798800 |
| H  | -0.42534100 | 5.49984300  | -1.20852700 |
| H  | 0.69773900  | 3.29591400  | -1.03735400 |
| H  | -2.92005700 | 1.58682800  | 0.54753200  |
| H  | -4.02863900 | 3.77152600  | 0.38272600  |

|   |             |            |             |
|---|-------------|------------|-------------|
| H | -2.79870200 | 5.74636600 | -0.49676800 |
|---|-------------|------------|-------------|

### IM7b

SCF done: -1010.822681

|    |             |             |             |
|----|-------------|-------------|-------------|
| C  | 1.86042600  | -0.31986600 | 0.59277200  |
| C  | 3.28990100  | -0.43772000 | 0.40736000  |
| C  | 3.95238600  | 0.13241100  | -0.71919300 |
| C  | 4.09060800  | -1.19531200 | 1.29875600  |
| C  | 5.30362700  | -0.04072800 | -0.92734000 |
| H  | 3.37649400  | 0.68179000  | -1.45394000 |
| C  | 5.45621100  | -1.35473400 | 1.11169600  |
| H  | 3.64121200  | -1.63652900 | 2.18104200  |
| C  | 6.07760200  | -0.78064500 | -0.01039700 |
| H  | 5.79532900  | 0.37274900  | -1.80126200 |
| H  | 6.02788200  | -1.92240100 | 1.83565500  |
| C  | 1.08196300  | -1.43490800 | 1.23130000  |
| H  | 0.26677900  | -1.06372700 | 1.86044800  |
| H  | 0.63180000  | -2.06465400 | 0.44644200  |
| H  | 1.71017100  | -2.09784000 | 1.82624600  |
| C  | 1.08549900  | 0.78321800  | 0.07662800  |
| H  | -4.71769400 | 0.35171200  | 1.01368000  |
| O  | -0.16027100 | 0.63408100  | -0.14894900 |
| Fe | -1.65818500 | -0.62900000 | -0.27055100 |
| Br | -1.44827800 | -2.65895100 | -1.67019500 |
| Br | -2.96002700 | -0.68160100 | 1.88691100  |
| Br | -5.70360500 | 1.06995100  | 0.12532900  |
| O  | -2.89570400 | 0.37707100  | -1.69594700 |
| H  | -3.05472500 | -0.27246200 | -2.39867800 |
| H  | -3.76991400 | 0.67161600  | -1.37462000 |
| O  | 7.39142900  | -0.88283700 | -0.30052600 |
| C  | 8.23489600  | -1.63928200 | 0.56564000  |
| H  | 9.23214600  | -1.58533000 | 0.12900800  |

|   |            |             |             |
|---|------------|-------------|-------------|
| H | 8.25574300 | -1.21174600 | 1.57476500  |
| H | 7.91556000 | -2.68645300 | 0.61717600  |
| C | 1.00540500 | 2.96219900  | -1.11554300 |
| C | 1.62328300 | 2.14949000  | -0.14756100 |
| C | 2.65438000 | 2.68862600  | 0.64325000  |
| C | 3.06736300 | 4.00513900  | 0.45508000  |
| C | 2.46696200 | 4.79516600  | -0.52840600 |
| C | 1.43595400 | 4.27070800  | -1.31331400 |
| H | 0.19178700 | 2.55133200  | -1.70328800 |
| H | 3.11317300 | 2.08542300  | 1.41834700  |
| H | 3.85327800 | 4.41733700  | 1.08057000  |
| H | 2.79520000 | 5.81976700  | -0.67670700 |
| H | 0.96301800 | 4.88539600  | -2.07309800 |

### IM8b

SCF done: -934.3399199

|   |            |             |             |
|---|------------|-------------|-------------|
| C | 1.79513700 | -0.55557100 | 1.07072300  |
| C | 3.12307300 | -0.36764100 | 0.53471900  |
| C | 3.35127000 | 0.37310900  | -0.66326600 |
| C | 4.25553300 | -0.98465700 | 1.12534800  |
| C | 4.60866800 | 0.48820700  | -1.21360000 |
| H | 2.51200700 | 0.82271000  | -1.17953600 |
| C | 5.52920100 | -0.85530500 | 0.59218900  |
| H | 4.14315000 | -1.54684200 | 2.04513800  |
| C | 5.71859800 | -0.11861200 | -0.59029100 |
| H | 4.76920800 | 1.02965500  | -2.13955100 |
| H | 6.36520900 | -1.32585700 | 1.09503800  |
| C | 1.43752300 | -1.82341100 | 1.79541200  |
| H | 0.66524400 | -1.65238100 | 2.54897200  |
| H | 1.03580900 | -2.55199600 | 1.07553500  |
| H | 2.30156600 | -2.29122000 | 2.26836600  |
| C | 0.70995100 | 0.36479100  | 0.83537100  |

|    |             |             |             |
|----|-------------|-------------|-------------|
| H  | -4.24876700 | 0.99768900  | -0.29232400 |
| O  | -0.49266700 | -0.07236200 | 0.89103000  |
| Fe | -1.79217600 | -1.36375300 | 0.26716200  |
| Br | -0.90964100 | -3.03442200 | -1.22044200 |
| Br | -4.06407100 | -1.05301700 | 1.06010400  |
| Br | -4.11977800 | 2.19757400  | -1.13485800 |
| O  | 6.90555800  | 0.05987600  | -1.20385600 |
| C  | 8.07051300  | -0.55159900 | -0.65225400 |
| H  | 8.88985800  | -0.28139400 | -1.31820700 |
| H  | 8.27930700  | -0.17278900 | 0.35484400  |
| H  | 7.96925900  | -1.64231200 | -0.62158600 |
| C  | -0.13023000 | 2.52965400  | -0.05219500 |
| C  | 0.87597500  | 1.82207500  | 0.63238700  |
| C  | 1.95491500  | 2.53486800  | 1.19191900  |
| C  | 2.03159900  | 3.91700500  | 1.04971100  |
| C  | 1.04075800  | 4.60602900  | 0.34441000  |
| C  | -0.03937700 | 3.90956000  | -0.20494500 |
| H  | -0.97842800 | 1.99419200  | -0.46307800 |
| H  | 2.71600700  | 2.00879400  | 1.75665700  |
| H  | 2.85962700  | 4.45901000  | 1.49627000  |
| H  | 1.10557800  | 5.68433900  | 0.23204900  |
| H  | -0.81767200 | 4.44013500  | -0.74417500 |

### TS10b

SCF done: -934.3277818

|   |            |             |             |
|---|------------|-------------|-------------|
| C | 1.08206600 | -0.33850300 | 0.96297600  |
| C | 2.42856100 | -0.51057500 | 0.45923600  |
| C | 2.86659700 | 0.13977800  | -0.73411600 |
| C | 3.33523500 | -1.41852100 | 1.06554700  |
| C | 4.12022900 | -0.08101000 | -1.25546800 |
| H | 2.19188600 | 0.80960300  | -1.25568400 |
| C | 4.60400600 | -1.64078500 | 0.55291600  |

|    |             |             |             |
|----|-------------|-------------|-------------|
| H  | 3.04403500  | -1.94264700 | 1.96832300  |
| C  | 5.01094400  | -0.97263900 | -0.61689200 |
| H  | 4.44630100  | 0.40759000  | -2.16715500 |
| H  | 5.26899100  | -2.32935900 | 1.05968800  |
| C  | 0.58696300  | -1.15901300 | 2.14289200  |
| H  | 1.04889300  | -0.80587500 | 3.07523700  |
| H  | -0.49544700 | -1.07101800 | 2.25594300  |
| H  | 0.82649900  | -2.21882400 | 2.02662100  |
| C  | 0.30561600  | 0.92594700  | 0.73317600  |
| H  | 0.34958500  | -1.17633200 | -0.19161400 |
| O  | -0.93200400 | 0.87145500  | 0.61028100  |
| Fe | -2.58081000 | -0.26661300 | -0.07914700 |
| Br | -3.45801700 | -1.51799200 | 1.79892500  |
| Br | -3.49162400 | 1.10265800  | -1.84826800 |
| Br | -0.60316800 | -1.94451500 | -1.21725700 |
| O  | 6.21288700  | -1.11690800 | -1.20609000 |
| C  | 7.16151800  | -2.02366300 | -0.64355600 |
| H  | 8.03669000  | -1.97403700 | -1.29095800 |
| H  | 7.44151900  | -1.72438100 | 0.37274800  |
| H  | 6.77180600  | -3.04753100 | -0.63298200 |
| C  | 0.94084400  | 2.26698400  | 0.70929900  |
| C  | 2.16958400  | 2.53602200  | 1.33920600  |
| C  | 2.67658000  | 3.83265900  | 1.35495900  |
| C  | 1.97379200  | 4.86646400  | 0.73046300  |
| C  | 0.75083300  | 4.60768200  | 0.10337700  |
| C  | 0.22678000  | 3.31940500  | 0.10364500  |
| H  | 2.71642600  | 1.73993900  | 1.83182600  |
| H  | 3.61770800  | 4.03807900  | 1.85557700  |
| H  | 2.37664300  | 5.87509800  | 0.73707400  |
| H  | 0.20435200  | 5.41168600  | -0.37953300 |
| H  | -0.72868000 | 3.10505200  | -0.36371100 |

### TS11b

SCF done: -1175.129322

|    |             |             |             |
|----|-------------|-------------|-------------|
| C  | -1.79233200 | -0.25024700 | -0.81316200 |
| C  | -1.51603400 | 1.53413300  | 1.14064200  |
| C  | -2.74002200 | 2.19443100  | 0.89350700  |
| C  | -0.69696600 | 2.01024600  | 2.19714200  |
| C  | -3.10247200 | 3.30507700  | 1.64822000  |
| H  | -3.39065000 | 1.86054300  | 0.09784000  |
| C  | -1.07638100 | 3.10857900  | 2.95551200  |
| H  | 0.24741100  | 1.51480200  | 2.40306200  |
| C  | -2.28222300 | 3.76393100  | 2.68319500  |
| H  | -4.03156700 | 3.81957600  | 1.42371200  |
| H  | -0.42861000 | 3.46198600  | 3.75141000  |
| C  | -1.29760400 | 0.42298600  | -2.09079100 |
| H  | -1.62237500 | 1.47068600  | -2.09408000 |
| H  | -0.21024000 | 0.40786500  | -2.14044800 |
| H  | -1.68586400 | -0.07724400 | -2.97854500 |
| C  | -1.03423500 | 0.32299700  | 0.41220600  |
| H  | -1.27181300 | -0.50293200 | 1.45154500  |
| O  | 0.31356400  | 0.22978100  | 0.31640200  |
| Fe | 1.83477000  | 1.75773000  | -0.14058900 |
| Br | 0.90073600  | 3.93428100  | -0.54373100 |
| Br | 2.99619900  | -2.06860500 | -1.56201000 |
| Br | 2.76485100  | 0.82135100  | -2.39532400 |
| Fe | 1.48869100  | -1.41446600 | 0.43872500  |
| Br | 3.17830900  | 0.47347400  | 1.57292500  |
| Br | 1.24474700  | -3.10564200 | 2.25109600  |
| Br | -0.96233500 | -2.26844900 | -0.95253300 |
| O  | -1.34730600 | -1.26674400 | 2.53602500  |
| H  | -0.63446700 | -1.97123500 | 2.48975900  |
| H  | -1.12012900 | -0.69954700 | 3.29167700  |
| H  | -2.57848000 | 4.62697100  | 3.27132600  |

|   |             |             |             |
|---|-------------|-------------|-------------|
| C | -3.27489400 | -0.43488000 | -0.69541500 |
| C | -3.86888000 | -1.03980800 | 0.43500100  |
| C | -4.13435300 | -0.01203400 | -1.72198100 |
| C | -5.23968400 | -1.18693900 | 0.53868300  |
| H | -3.25242700 | -1.42235200 | 1.23918400  |
| C | -5.51972800 | -0.14915900 | -1.62910100 |
| H | -3.73494500 | 0.45097900  | -2.61578500 |
| C | -6.08513400 | -0.73869400 | -0.49243500 |
| H | -5.68807200 | -1.65696600 | 1.40744400  |
| H | -6.13918700 | 0.20094800  | -2.44563600 |
| O | -7.41096100 | -0.92427100 | -0.29142300 |
| C | -8.32009400 | -0.51572000 | -1.30851600 |
| H | -8.13802200 | -1.05254600 | -2.24706800 |
| H | -9.31433100 | -0.76461800 | -0.93685500 |
| H | -8.26008700 | 0.56437600  | -1.48914600 |

### IM9b

SCF done: -1175.190836

|   |            |             |             |
|---|------------|-------------|-------------|
| C | 2.02178600 | -0.33783300 | -1.15971200 |
| C | 1.79603100 | 1.57875900  | 0.53598800  |
| C | 2.79493300 | 2.41776000  | -0.00359000 |
| C | 1.23076900 | 1.90283200  | 1.78740600  |
| C | 3.22189400 | 3.53912300  | 0.69772400  |
| H | 3.20385500 | 2.20610100  | -0.98456600 |
| C | 1.67852500 | 3.01566100  | 2.49104400  |
| H | 0.47433800 | 1.25744600  | 2.21920000  |
| C | 2.67123400 | 3.83656500  | 1.94841400  |
| H | 3.97600400 | 4.18948600  | 0.26575900  |
| H | 1.25187900 | 3.24232500  | 3.46268900  |
| C | 1.22868800 | -1.04286300 | -2.22367400 |
| H | 0.66076300 | -1.86967000 | -1.77406100 |
| H | 0.49514700 | -0.37354400 | -2.68327600 |

|    |             |             |             |
|----|-------------|-------------|-------------|
| H  | 1.86274000  | -1.47519000 | -2.99685200 |
| C  | 1.27321200  | 0.43070400  | -0.21614700 |
| H  | -3.42276100 | -2.92231100 | -1.04084300 |
| O  | 0.00322300  | 0.12764600  | -0.05608500 |
| Fe | -0.58421000 | -1.65299700 | 1.16500900  |
| Br | 1.24077200  | -1.86171800 | 2.75463100  |
| Br | -4.71623800 | -2.37598700 | -1.54017000 |
| Br | -1.28489000 | -3.45044800 | -0.39687100 |
| Fe | -1.65340500 | 1.26980500  | -0.18140000 |
| Br | -2.58604000 | -0.13079600 | 1.84320800  |
| Br | -0.82025300 | 2.80652300  | -2.25658200 |
| Br | -2.08568900 | 3.75806200  | 0.38086100  |
| O  | -3.20675100 | 0.66093500  | -1.40954600 |
| H  | -3.76735200 | -0.12858000 | -1.27495400 |
| H  | -3.19197700 | 0.88218800  | -2.35026700 |
| H  | 3.01047000  | 4.71106500  | 2.49555600  |
| C  | 3.44809600  | -0.51487400 | -1.05880600 |
| C  | 4.24034700  | -0.80517500 | -2.20121900 |
| C  | 4.11391300  | -0.49432400 | 0.20527200  |
| C  | 5.60468700  | -1.02213700 | -2.11115100 |
| H  | 3.78204900  | -0.81570800 | -3.18359800 |
| C  | 5.46462200  | -0.73735900 | 0.30612600  |
| H  | 3.53485300  | -0.35430700 | 1.11005800  |
| C  | 6.23205100  | -0.99588100 | -0.84986500 |
| H  | 6.17466100  | -1.21144900 | -3.01235900 |
| H  | 5.96062700  | -0.75876100 | 1.27025100  |
| O  | 7.54276500  | -1.21217700 | -0.64368100 |
| C  | 8.38578200  | -1.52319100 | -1.75388800 |
| H  | 8.40969200  | -0.69962300 | -2.47616800 |
| H  | 9.38136900  | -1.66848300 | -1.33545000 |
| H  | 8.06015900  | -2.44310700 | -2.25167000 |

**IM10b**

SCF done: -1098.674016

|    |             |             |             |
|----|-------------|-------------|-------------|
| C  | 1.99957100  | 0.01911000  | -1.06866600 |
| C  | 1.29397300  | 1.51870600  | 0.89883900  |
| C  | 2.11452100  | 2.62677700  | 0.59856200  |
| C  | 0.59734100  | 1.49448900  | 2.12616700  |
| C  | 2.24093700  | 3.67196700  | 1.50653400  |
| H  | 2.61737000  | 2.68137500  | -0.35962700 |
| C  | 0.74331800  | 2.53653800  | 3.03580900  |
| H  | -0.02763400 | 0.64355700  | 2.37458100  |
| C  | 1.56204900  | 3.62743200  | 2.72796600  |
| H  | 2.85760300  | 4.52966500  | 1.25700900  |
| H  | 0.21838300  | 2.49721000  | 3.98477100  |
| C  | 1.42466300  | -0.65922400 | -2.28077400 |
| H  | 1.02850200  | -1.64463800 | -1.99895100 |
| H  | 0.58287900  | -0.09748300 | -2.69664400 |
| H  | 2.17206200  | -0.82686300 | -3.05538600 |
| C  | 1.06566000  | 0.44291100  | -0.07639200 |
| H  | -2.32268000 | -1.98388400 | -1.85226800 |
| O  | -0.12435400 | -0.11845700 | -0.08082000 |
| Fe | -0.44065400 | -2.17392100 | 0.77111500  |
| Br | 1.47337000  | -2.44752600 | 2.22815400  |
| Br | -3.00680000 | -0.67216900 | -2.23062900 |
| Br | -1.07496200 | -3.58331700 | -1.19265600 |
| Fe | -1.96114000 | 0.71134200  | -0.08065900 |
| Br | -2.60887900 | -1.10914600 | 1.71538900  |
| Br | -1.38548800 | 2.87634400  | -1.57360200 |
| Br | -3.53058100 | 2.61062800  | 0.59427100  |
| H  | 1.66470700  | 4.44487500  | 3.43529800  |
| C  | 3.42454900  | 0.15894000  | -0.90708800 |
| C  | 4.28318600  | 0.28175500  | -2.03161400 |
| C  | 4.04137700  | 0.10659000  | 0.38028100  |

|   |            |             |             |
|---|------------|-------------|-------------|
| C | 5.65597300 | 0.39595700  | -1.89570700 |
| H | 3.85766500 | 0.33896800  | -3.02706000 |
| C | 5.40787200 | 0.18750700  | 0.52140400  |
| H | 3.42871800 | -0.06833400 | 1.25646600  |
| C | 6.23470700 | 0.34668400  | -0.61183900 |
| H | 6.27033900 | 0.52162700  | -2.77870800 |
| H | 5.87766800 | 0.11166500  | 1.49585200  |
| O | 7.55285400 | 0.43257300  | -0.36474100 |
| C | 8.46423200 | 0.56748300  | -1.45672800 |
| H | 8.27610100 | 1.48991200  | -2.01722500 |
| H | 9.45624600 | 0.61049000  | -1.00805700 |
| H | 8.40403600 | -0.29422400 | -2.13036200 |

**TS12b**

SCF done: -1098.689088

|   |             |             |             |
|---|-------------|-------------|-------------|
| C | -1.84234800 | 0.11012900  | -1.15123800 |
| C | -3.27432300 | 0.04687700  | -0.91104200 |
| C | -3.78636900 | -0.16901000 | 0.40460200  |
| C | -4.20784800 | 0.06240000  | -1.97835500 |
| C | -5.13342200 | -0.31973400 | 0.63151000  |
| H | -3.09879100 | -0.25065200 | 1.23986700  |
| C | -5.56864500 | -0.07368100 | -1.75880500 |
| H | -3.85821900 | 0.20881100  | -2.99382100 |
| C | -6.04693700 | -0.26844300 | -0.44701900 |
| H | -5.52189700 | -0.49958600 | 1.62783500  |
| H | -6.25141200 | -0.03143500 | -2.59837400 |
| C | -1.32140200 | 1.82669100  | 0.72980600  |
| C | -2.34707000 | 2.73194000  | 0.38080900  |
| C | -0.59743900 | 2.02784300  | 1.92552800  |
| C | -2.63563000 | 3.81048300  | 1.20737900  |
| H | -2.88709700 | 2.60987600  | -0.55053200 |
| C | -0.91415400 | 3.09243600  | 2.76013000  |

|    |             |             |             |
|----|-------------|-------------|-------------|
| H  | 0.18528400  | 1.33143400  | 2.20286400  |
| C  | -1.92661900 | 3.98717200  | 2.40010300  |
| H  | -3.40681400 | 4.51860500  | 0.92187800  |
| H  | -0.36780800 | 3.22786000  | 3.68768100  |
| H  | -2.16059300 | 4.82719400  | 3.04738700  |
| C  | -1.29698800 | 0.12649000  | -2.57733100 |
| H  | -1.48441000 | 1.10022800  | -3.04776900 |
| H  | -0.21861300 | -0.03820700 | -2.57106300 |
| H  | -1.75871100 | -0.65190600 | -3.18851900 |
| C  | -0.92496400 | 0.73260800  | -0.16134100 |
| H  | -1.52458000 | -1.31502500 | -0.86660000 |
| O  | 0.28173700  | 0.31955300  | -0.13511600 |
| Fe | 2.19353700  | 1.47676500  | -0.33131400 |
| Br | 1.62205900  | 3.71035100  | -1.00148800 |
| Br | 2.77287700  | -2.59946100 | -0.82634200 |
| Br | 3.11355700  | 0.01485000  | -2.29228300 |
| Fe | 1.10096800  | -1.52061900 | 0.84017400  |
| Br | 3.02149000  | 0.27851100  | 1.71232100  |
| Br | -0.08382500 | -1.83580900 | 2.92456800  |
| Br | -1.02045200 | -2.86923200 | -0.68203300 |
| O  | -7.33901900 | -0.42473000 | -0.11927100 |
| C  | -8.33335300 | -0.42888500 | -1.14673800 |
| H  | -9.28247900 | -0.58492400 | -0.63510700 |
| H  | -8.35626200 | 0.52916600  | -1.67738700 |
| H  | -8.16111700 | -1.24405600 | -1.85757700 |
